# Supplementary material
Source: publisher figshare collection journal article supplement (https://wiley.figshare.com/ndownloader/files/17599193)
Supplement: Supplementary file 1 [file 17599193]

PHOTO_FILE_NAME	PHOTO_TIMESTAMP	LATITUDE_WGS84	LONGITUDE_WGS84	ALTITUDE	SURVEY_TYPE	COUNT_ADULT	COUNT_PUP	KELP_PRESENT	LAND_PRESENT	IMAGE_QUALITY	COUNTED_BY	COUNTED_DATE	PROTOCOL_ID	QUALITY_FLAG
SO_C_20180719_A_0021.JPG	2018-07-19 14:55:23	58.39951667	-135.64430278	216	Abundance	0	0	0	1	Good	LFT	2018-09-25	SO-2017.1	0
SO_C_20180719_A_0022.JPG	2018-07-19 14:55:24	58.39936389	-135.64499444	216	Abundance	0	0	0	1	Good	LFT	2018-09-25	SO-2017.1	0
SO_C_20180719_A_0023.JPG	2018-07-19 14:55:25	58.39921667	-135.64569722	216	Abundance	0	0	0	1	Good	LFT	2018-09-25	SO-2017.1	0
SO_C_20180719_A_0024.JPG	2018-07-19 14:55:26	58.39907778	-135.64640556	216	Abundance	0	0	0	1	Good	LFT	2018-09-25	SO-2017.1	0
SO_C_20180719_A_0025.JPG	2018-07-19 14:55:27	58.39894722	-135.64711944	216	Abundance	0	0	0	1	Good	LFT	2018-09-25	SO-2017.1	0
SO_C_20180719_A_0026.JPG	2018-07-19 14:55:28	58.39882778	-135.64783611	215	Abundance	0	0	0	1	Good	LFT	2018-09-25	SO-2017.1	0
SO_C_20180719_A_0027.JPG	2018-07-19 14:55:29	58.39871111	-135.64855556	215	Abundance	0	0	0	1	Good	LFT	2018-09-25	SO-2017.1	0
SO_C_20180719_A_0028.JPG	2018-07-19 15:02:52	58.49840000	-135.91413611	218	Abundance	0	0	0	0	Good	LFT	2018-09-25	SO-2017.1	0
SO_C_20180719_A_0029.JPG	2018-07-19 15:02:53	58.49843056	-135.91495556	219	Abundance	0	0	0	0	Good	LFT	2018-09-25	SO-2017.1	0
SO_C_20180719_A_0030.JPG	2018-07-19 15:02:54	58.49845556	-135.91577500	219	Abundance	0	0	0	0	Good	LFT	2018-09-25	SO-2017.1	0
SO_C_20180719_A_0031.JPG	2018-07-19 15:02:55	58.49847500	-135.91659722	219	Abundance	0	0	0	0	Good	LFT	2018-09-25	SO-2017.1	0
SO_C_20180719_A_0032.JPG	2018-07-19 15:02:56	58.49848889	-135.91741667	218	Abundance	0	0	1	0	Good	LFT	2018-09-25	SO-2017.1	0
SO_C_20180719_A_0033.JPG	2018-07-19 15:02:57	58.49849444	-135.91823889	218	Abundance	0	0	0	0	Good	LFT	2018-09-25	SO-2017.1	0
SO_C_20180719_A_0034.JPG	2018-07-19 15:02:58	58.49849167	-135.91905833	217	Abundance	0	0	0	0	Good	LFT	2018-09-25	SO-2017.1	0
SO_C_20180719_A_0035.JPG	2018-07-19 15:02:59	58.49848611	-135.91987778	216	Abundance	0	0	0	0	Good	LFT	2018-09-25	SO-2017.1	0
SO_C_20180719_A_0036.JPG	2018-07-19 15:03:00	58.49847500	-135.92069722	216	Abundance	0	0	0	0	Good	LFT	2018-09-25	SO-2017.1	0
SO_C_20180719_A_0037.JPG	2018-07-19 15:03:01	58.49846111	-135.92151389	215	Abundance	0	0	0	0	Good	LFT	2018-09-25	SO-2017.1	0
SO_C_20180719_A_0038.JPG	2018-07-19 15:03:02	58.49845278	-135.92232222	214	Abundance	0	0	0	0	Good	LFT	2018-09-25	SO-2017.1	0
SO_C_20180719_A_0039.JPG	2018-07-19 15:03:03	58.49844167	-135.92313056	214	Abundance	0	0	0	0	Good	LFT	2018-09-25	SO-2017.1	0
SO_C_20180719_A_0040.JPG	2018-07-19 15:03:04	58.49843611	-135.92393889	213	Abundance	0	0	0	0	Good	LFT	2018-09-25	SO-2017.1	0
SO_C_20180719_A_0041.JPG	2018-07-19 15:03:05	58.49843333	-135.92474722	213	Abundance	0	0	0	0	Good	LFT	2018-09-25	SO-2017.1	0
SO_C_20180719_A_0042.JPG	2018-07-19 15:03:06	58.49843056	-135.92555278	213	Abundance	0	0	0	0	Good	LFT	2018-09-25	SO-2017.1	0
SO_C_20180719_A_0043.JPG	2018-07-19 15:03:07	58.49842500	-135.92636389	213	Abundance	0	0	1	1	Good	LFT	2018-09-25	SO-2017.1	0
SO_C_20180719_A_0044.JPG	2018-07-19 15:03:08	58.49841944	-135.92717222	213	Abundance	0	0	1	1	Good	LFT	2018-09-25	SO-2017.1	0
SO_C_20180719_A_0045.JPG	2018-07-19 15:03:09	58.49841111	-135.92797778	213	Abundance	0	0	1	1	Good	LFT	2018-09-25	SO-2017.1	0
SO_C_20180719_A_0046.JPG	2018-07-19 15:03:10	58.49840556	-135.92878889	212	Abundance	0	0	0	1	Good	LFT	2018-09-25	SO-2017.1	0
SO_C_20180719_A_0047.JPG	2018-07-19 15:03:11	58.49840556	-135.92959722	212	Abundance	0	0	0	1	Good	LFT	2018-09-25	SO-2017.1	0
SO_C_20180719_A_0048.JPG	2018-07-19 15:03:12	58.49840556	-135.93041111	212	Abundance	0	0	0	1	Good	LFT	2018-09-25	SO-2017.1	0
SO_C_20180719_A_0049.JPG	2018-07-19 15:03:13	58.49840278	-135.93122500	211	Abundance	0	0	0	1	Good	LFT	2018-09-25	SO-2017.1	0
SO_C_20180719_A_0050.JPG	2018-07-19 15:03:14	58.49840278	-135.93203611	211	Abundance	0	0	0	1	Good	LFT	2018-09-25	SO-2017.1	0
SO_C_20180719_A_0051.JPG	2018-07-19 15:03:15	58.49840278	-135.93285000	210	Abundance	0	0	0	1	Good	LFT	2018-09-25	SO-2017.1	0
SO_C_20180719_A_0052.JPG	2018-07-19 15:03:16	58.49840556	-135.93366389	210	Abundance	0	0	0	1	Good	LFT	2018-09-25	SO-2017.1	0
SO_C_20180719_A_0053.JPG	2018-07-19 15:03:17	58.49841111	-135.93447778	210	Abundance	0	0	0	1	Good	LFT	2018-09-25	SO-2017.1	0
SO_C_20180719_A_0054.JPG	2018-07-19 15:03:18	58.49841944	-135.93529167	209	Abundance	0	0	0	1	Good	LFT	2018-09-25	SO-2017.1	0
SO_C_20180719_A_0055.JPG	2018-07-19 15:03:19	58.49842778	-135.93610556	209	Abundance	0	0	0	1	Good	LFT	2018-09-25	SO-2017.1	0
SO_C_20180719_A_0056.JPG	2018-07-19 15:03:20	58.49843333	-135.93691667	209	Abundance	0	0	1	1	Good	LFT	2018-09-25	SO-2017.1	0
SO_C_20180719_A_0057.JPG	2018-07-19 15:03:21	58.49843056	-135.93772500	209	Abundance	0	0	1	1	Good	LFT	2018-09-25	SO-2017.1	0
SO_C_20180719_A_0058.JPG	2018-07-19 15:03:22	58.49843056	-135.93853056	209	Abundance	0	0	1	1	Good	LFT	2018-09-25	SO-2017.1	0
SO_C_20180719_A_0059.JPG	2018-07-19 15:03:23	58.49842500	-135.93933611	210	Abundance	0	0	1	1	Good	LFT	2018-09-25	SO-2017.1	0
SO_C_20180719_A_0060.JPG	2018-07-19 15:03:24	58.49841944	-135.94013889	210	Abundance	0	0	1	1	Good	LFT	2018-09-25	SO-2017.1	0
SO_C_20180719_A_0061.JPG	2018-07-19 15:03:25	58.49841389	-135.94093889	210	Abundance	0	0	1	0	Good	LFT	2018-09-25	SO-2017.1	0
SO_C_20180719_A_0062.JPG	2018-07-19 15:03:26	58.49841111	-135.94174167	210	Abundance	0	0	1	0	Good	LFT	2018-09-25	SO-2017.1	0
SO_C_20180719_A_0063.JPG	2018-07-19 15:03:27	58.49840556	-135.94254444	210	Abundance	0	0	1	0	Good	LFT	2018-09-25	SO-2017.1	0
SO_C_20180719_A_0064.JPG	2018-07-19 15:03:28	58.49840000	-135.94334722	210	Abundance	0	0	1	0	Good	LFT	2018-09-25	SO-2017.1	0
SO_C_20180719_A_0065.JPG	2018-07-19 15:03:29	58.49838611	-135.94415278	210	Abundance	0	0	1	0	Good	LFT	2018-09-25	SO-2017.1	0
SO_C_20180719_A_0066.JPG	2018-07-19 15:03:30	58.49837778	-135.94496111	210	Abundance	0	0	1	0	Good	LFT	2018-09-25	SO-2017.1	0
SO_C_20180719_A_0067.JPG	2018-07-19 15:03:31	58.49836944	-135.94577500	210	Abundance	0	0	1	0	Good	LFT	2018-09-25	SO-2017.1	0
SO_C_20180719_A_0068.JPG	2018-07-19 15:03:32	58.49835556	-135.94658889	209	Abundance	0	0	1	0	Good	LFT	2018-09-25	SO-2017.1	0
SO_C_20180719_A_0069.JPG	2018-07-19 15:03:33	58.49834167	-135.94740556	209	Abundance	0	0	1	0	Good	LFT	2018-09-25	SO-2017.1	0
SO_C_20180719_A_0070.JPG	2018-07-19 15:03:34	58.49832500	-135.94822778	210	Abundance	0	0	0	0	Good	LFT	2018-09-25	SO-2017.1	0
SO_C_20180719_A_0071.JPG	2018-07-19 15:03:35	58.49831944	-135.94904722	210	Abundance	0	0	0	0	Good	LFT	2018-09-25	SO-2017.1	0
SO_C_20180719_A_0072.JPG	2018-07-19 15:03:36	58.49830833	-135.94986667	210	Abundance	0	0	1	0	Good	LFT	2018-09-25	SO-2017.1	0
SO_C_20180719_A_0073.JPG	2018-07-19 15:03:37	58.49830278	-135.95068611	211	Abundance	0	0	0	1	Good	LFT	2018-09-25	SO-2017.1	0
SO_C_20180719_A_0074.JPG	2018-07-19 15:03:38	58.49829444	-135.95150556	211	Abundance	0	0	0	1	Good	LFT	2018-09-25	SO-2017.1	0
SO_C_20180719_A_0075.JPG	2018-07-19 15:03:39	58.49828333	-135.95232778	211	Abundance	0	0	0	1	Good	LFT	2018-09-25	SO-2017.1	0
SO_C_20180719_A_0076.JPG	2018-07-19 15:03:40	58.49827500	-135.95314722	211	Abundance	0	0	1	1	Good	LFT	2018-09-25	SO-2017.1	0
SO_C_20180719_A_0077.JPG	2018-07-19 15:03:41	58.49825833	-135.95396667	211	Abundance	0	0	1	1	Good	LFT	2018-09-25	SO-2017.1	0
SO_C_20180719_A_0078.JPG	2018-07-19 15:03:42	58.49824167	-135.95478889	211	Abundance	0	0	1	1	Good	LFT	2018-09-25	SO-2017.1	0
SO_C_20180719_A_0079.JPG	2018-07-19 15:03:43	58.49823056	-135.95560833	211	Abundance	0	0	1	0	Good	LFT	2018-09-25	SO-2017.1	0
SO_C_20180719_A_0080.JPG	2018-07-19 15:03:44	58.49821667	-135.95642500	211	Abundance	0	0	1	1	Good	LFT	2018-09-25	SO-2017.1	0
SO_C_20180719_A_0081.JPG	2018-07-19 15:03:45	58.49820278	-135.95723889	210	Abundance	0	0	1	0	Good	LFT	2018-09-25	SO-2017.1	0
SO_C_20180719_A_0082.JPG	2018-07-19 15:03:46	58.49818611	-135.95805278	210	Abundance	0	0	1	0	Good	LFT	2018-09-25	SO-2017.1	0
SO_C_20180719_A_0083.JPG	2018-07-19 15:03:47	58.49817778	-135.95886944	210	Abundance	0	0	1	0	Good	LFT	2018-09-25	SO-2017.1	0
SO_C_20180719_A_0084.JPG	2018-07-19 15:03:48	58.49816944	-135.95968333	210	Abundance	0	0	1	0	Good	LFT	2018-09-25	SO-2017.1	0
SO_C_20180719_A_0085.JPG	2018-07-19 15:03:49	58.49815833	-135.96048889	211	Abundance	0	0	1	1	Good	LFT	2018-09-25	SO-2017.1	0
SO_C_20180719_A_0086.JPG	2018-07-19 15:03:50	58.49815278	-135.96129167	211	Abundance	0	0	1	1	Good	LFT	2018-09-25	SO-2017.1	0
SO_C_20180719_A_0087.JPG	2018-07-19 15:03:51	58.49814722	-135.96210000	212	Abundance	0	0	1	1	Good	LFT	2018-09-25	SO-2017.1	0
SO_C_20180719_A_0088.JPG	2018-07-19 15:03:52	58.49814722	-135.96290556	212	Abundance	0	0	1	0	Good	LFT	2018-09-25	SO-2017.1	0
SO_C_20180719_A_0089.JPG	2018-07-19 15:03:53	58.49815000	-135.96371389	213	Abundance	0	0	1	0	Good	LFT	2018-09-25	SO-2017.1	0
SO_C_20180719_A_0090.JPG	2018-07-19 15:03:54	58.49815278	-135.96452500	214	Abundance	0	0	1	1	Good	LFT	2018-09-25	SO-2017.1	0
SO_C_20180719_A_0091.JPG	2018-07-19 15:03:55	58.49815833	-135.96533889	215	Abundance	0	0	1	1	Good	LFT	2018-09-25	SO-2017.1	0
SO_C_20180719_A_0092.JPG	2018-07-19 15:03:56	58.49816389	-135.96615556	215	Abundance	0	0	1	1	Good	LFT	2018-09-25	SO-2017.1	0
SO_C_20180719_A_0093.JPG	2018-07-19 15:03:57	58.49816944	-135.96697500	216	Abundance	0	0	1	1	Good	LFT	2018-09-25	SO-2017.1	0
SO_C_20180719_A_0094.JPG	2018-07-19 15:03:58	58.49817222	-135.96778889	216	Abundance	0	0	0	0	Good	LFT	2018-09-25	SO-2017.1	0
SO_C_20180719_A_0095.JPG	2018-07-19 15:03:59	58.49817222	-135.96860833	217	Abundance	0	0	0	0	Good	LFT	2018-09-25	SO-2017.1	0
SO_C_20180719_A_0096.JPG	2018-07-19 15:04:00	58.49816944	-135.96942500	217	Abundance	0	0	0	0	Good	LFT	2018-09-25	SO-2017.1	0
SO_C_20180719_A_0097.JPG	2018-07-19 15:04:01	58.49816389	-135.97024167	217	Abundance	0	0	0	0	Good	LFT	2018-09-25	SO-2017.1	0
SO_C_20180719_A_0098.JPG	2018-07-19 15:04:02	58.49815833	-135.97106111	217	Abundance	0	0	0	0	Good	LFT	2018-09-25	SO-2017.1	0
SO_C_20180719_A_0099.JPG	2018-07-19 15:04:03	58.49815000	-135.97187778	217	Abundance	0	0	1	0	Good	LFT	2018-09-25	SO-2017.1	0
SO_C_20180719_A_0100.JPG	2018-07-19 15:04:04	58.49814167	-135.97269722	217	Abundance	0	0	1	0	Good	LFT	2018-09-25	SO-2017.1	0
SO_C_20180719_A_0101.JPG	2018-07-19 15:04:05	58.49813056	-135.97351667	217	Abundance	0	0	1	0	Good	LFT	2018-09-25	SO-2017.1	0
SO_C_20180719_A_0102.JPG	2018-07-19 15:04:06	58.49811389	-135.97433889	217	Abundance	0	0	1	0	Good	LFT	2018-09-25	SO-2017.1	0
SO_C_20180719_A_0103.JPG	2018-07-19 15:04:07	58.49809722	-135.97515833	217	Abundance	0	0	0	0	Good	LFT	2018-09-25	SO-2017.1	0
SO_C_20180719_A_0104.JPG	2018-07-19 15:04:08	58.49808056	-135.97598056	217	Abundance	0	0	0	0	Good	LFT	2018-09-25	SO-2017.1	0
SO_C_20180719_A_0105.JPG	2018-07-19 15:04:09	58.49806667	-135.97680278	217	Abundance	0	0	0	0	Good	LFT	2018-09-25	SO-2017.1	0
SO_C_20180719_A_0106.JPG	2018-07-19 15:04:10	58.49805278	-135.97763056	217	Abundance	0	0	1	0	Good	LFT	2018-09-25	SO-2017.1	0
SO_C_20180719_A_0107.JPG	2018-07-19 15:04:11	58.49803889	-135.97845556	217	Abundance	0	0	0	0	Good	LFT	2018-09-25	SO-2017.1	0
SO_C_20180719_A_0108.JPG	2018-07-19 15:04:12	58.49802222	-135.97928056	217	Abundance	0	0	0	0	Good	LFT	2018-09-25	SO-2017.1	0
SO_C_20180719_A_0109.JPG	2018-07-19 15:04:13	58.49800278	-135.98010556	217	Abundance	0	0	0	0	Good	LFT	2018-09-25	SO-2017.1	0
SO_C_20180719_A_0110.JPG	2018-07-19 15:04:14	58.49798611	-135.98093333	217	Abundance	0	0	1	0	Good	LFT	2018-09-25	SO-2017.1	0
SO_C_20180719_A_0111.JPG	2018-07-19 15:04:15	58.49796389	-135.98176111	217	Abundance	0	0	1	0	Good	LFT	2018-09-25	SO-2017.1	0
SO_C_20180719_A_0112.JPG	2018-07-19 15:04:16	58.49794167	-135.98258889	217	Abundance	0	0	0	0	Good	LFT	2018-09-25	SO-2017.1	0
SO_C_20180719_A_0113.JPG	2018-07-19 15:04:17	58.49791944	-135.98341667	218	Abundance	0	0	1	0	Good	LFT	2018-09-25	SO-2017.1	0
SO_C_20180719_A_0114.JPG	2018-07-19 15:04:18	58.49789444	-135.98424444	218	Abundance	0	0	1	0	Good	LFT	2018-09-25	SO-2017.1	0
SO_C_20180719_A_0115.JPG	2018-07-19 15:04:19	58.49786944	-135.98506944	218	Abundance	0	0	1	0	Good	LFT	2018-09-25	SO-2017.1	0
SO_C_20180719_A_0116.JPG	2018-07-19 15:04:20	58.49784444	-135.98589444	218	Abundance	0	0	1	0	Good	LFT	2018-09-25	SO-2017.1	0
SO_C_20180719_A_0117.JPG	2018-07-19 15:04:21	58.49782500	-135.98672500	218	Abundance	0	0	1	0	Good	LFT	2018-09-25	SO-2017.1	0
SO_C_20180719_A_0118.JPG	2018-07-19 15:04:22	58.49781111	-135.98755278	218	Abundance	0	0	0	0	Good	LFT	2018-09-25	SO-2017.1	0
SO_C_20180719_A_0119.JPG	2018-07-19 15:04:23	58.49780000	-135.98838333	218	Abundance	0	0	0	0	Good	LFT	2018-09-25	SO-2017.1	0
SO_C_20180719_A_0120.JPG	2018-07-19 15:04:24	58.49778889	-135.98921667	218	Abundance	0	0	0	0	Good	LFT	2018-09-25	SO-2017.1	0
SO_C_20180719_A_0121.JPG	2018-07-19 15:04:25	58.49778333	-135.99005278	218	Abundance	0	0	1	0	Good	LFT	2018-09-25	SO-2017.1	0
SO_C_20180719_A_0122.JPG	2018-07-19 15:04:26	58.49777778	-135.99089167	218	Abundance	0	0	0	0	Good	LFT	2018-09-25	SO-2017.1	0
SO_C_20180719_A_0123.JPG	2018-07-19 15:04:27	58.49777222	-135.99173333	218	Abundance	0	0	0	0	Good	LFT	2018-09-25	SO-2017.1	0
SO_C_20180719_A_0124.JPG	2018-07-19 15:04:28	58.49776667	-135.99258056	217	Abundance	0	0	0	0	Good	LFT	2018-09-25	SO-2017.1	0
SO_C_20180719_A_0125.JPG	2018-07-19 15:04:29	58.49776111	-135.99343056	217	Abundance	0	0	1	0	Good	LFT	2018-09-25	SO-2017.1	0
SO_C_20180719_A_0126.JPG	2018-07-19 15:04:30	58.49775278	-135.99428333	217	Abundance	0	0	0	0	Good	LFT	2018-09-25	SO-2017.1	0
SO_C_20180719_A_0127.JPG	2018-07-19 15:04:31	58.49774444	-135.99513889	216	Abundance	0	0	0	0	Good	LFT	2018-09-25	SO-2017.1	0
SO_C_20180719_A_0128.JPG	2018-07-19 15:04:32	58.49773333	-135.99599722	216	Abundance	0	0	0	0	Good	LFT	2018-09-25	SO-2017.1	0
SO_C_20180719_A_0129.JPG	2018-07-19 15:04:33	58.49772222	-135.99685833	215	Abundance	0	0	0	0	Good	LFT	2018-09-25	SO-2017.1	0
SO_C_20180719_A_0130.JPG	2018-07-19 15:04:34	58.49771111	-135.99771389	214	Abundance	0	0	1	0	Good	LFT	2018-09-25	SO-2017.1	0
SO_C_20180719_A_0131.JPG	2018-07-19 15:04:35	58.49770000	-135.99856667	212	Abundance	0	0	1	0	Good	LFT	2018-09-25	SO-2017.1	0
SO_C_20180719_A_0132.JPG	2018-07-19 15:04:36	58.49769167	-135.99941667	211	Abundance	0	0	1	0	Good	LFT	2018-09-25	SO-2017.1	0
SO_C_20180719_A_0133.JPG	2018-07-19 15:04:37	58.49768333	-136.00026111	210	Abundance	0	0	1	0	Good	LFT	2018-09-25	SO-2017.1	0
SO_C_20180719_A_0134.JPG	2018-07-19 15:04:38	58.49767778	-136.00110278	210	Abundance	0	0	1	0	Good	LFT	2018-09-25	SO-2017.1	0
SO_C_20180719_A_0135.JPG	2018-07-19 15:04:39	58.49767222	-136.00193889	209	Abundance	0	0	1	0	Good	LFT	2018-09-25	SO-2017.1	0
SO_C_20180719_A_0136.JPG	2018-07-19 15:04:40	58.49766944	-136.00277222	209	Abundance	0	0	1	0	Good	LFT	2018-09-25	SO-2017.1	0
SO_C_20180719_A_0137.JPG	2018-07-19 15:04:41	58.49766944	-136.00360278	209	Abundance	0	0	1	0	Good	LFT	2018-09-25	SO-2017.1	0
SO_C_20180719_A_0138.JPG	2018-07-19 15:04:42	58.49767222	-136.00442778	210	Abundance	0	0	1	0	Good	LFT	2018-09-25	SO-2017.1	0
SO_C_20180719_A_0139.JPG	2018-07-19 15:04:43	58.49767500	-136.00525556	211	Abundance	0	0	1	0	Good	LFT	2018-09-25	SO-2017.1	0
SO_C_20180719_A_0140.JPG	2018-07-19 15:04:44	58.49768333	-136.00608333	211	Abundance	0	0	0	0	Good	LFT	2018-09-25	SO-2017.1	0
SO_C_20180719_A_0141.JPG	2018-07-19 15:04:45	58.49769444	-136.00691111	212	Abundance	0	0	1	0	Good	LFT	2018-09-25	SO-2017.1	0
SO_C_20180719_A_0142.JPG	2018-07-19 15:04:46	58.49770278	-136.00773889	213	Abundance	0	0	1	0	Good	LFT	2018-09-25	SO-2017.1	0
SO_C_20180719_A_0143.JPG	2018-07-19 15:04:47	58.49771389	-136.00857222	213	Abundance	0	0	1	0	Good	LFT	2018-09-25	SO-2017.1	0
SO_C_20180719_A_0144.JPG	2018-07-19 15:04:48	58.49772500	-136.00941111	214	Abundance	0	0	1	0	Good	LFT	2018-09-25	SO-2017.1	0
SO_C_20180719_A_0145.JPG	2018-07-19 15:04:49	58.49773611	-136.01025000	214	Abundance	0	0	1	0	Good	LFT	2018-09-25	SO-2017.1	0
SO_C_20180719_A_0146.JPG	2018-07-19 15:04:50	58.49774444	-136.01109444	214	Abundance	0	0	1	0	Good	LFT	2018-09-25	SO-2017.1	0
SO_C_20180719_A_0147.JPG	2018-07-19 15:04:51	58.49775556	-136.01193611	214	Abundance	0	0	0	0	Good	LFT	2018-09-25	SO-2017.1	0
SO_C_20180719_A_0148.JPG	2018-07-19 15:04:52	58.49776944	-136.01278056	213	Abundance	0	0	1	0	Good	LFT	2018-09-25	SO-2017.1	0
SO_C_20180719_A_0149.JPG	2018-07-19 15:04:53	58.49778056	-136.01362500	213	Abundance	0	0	1	0	Good	LFT	2018-09-25	SO-2017.1	0
SO_C_20180719_A_0150.JPG	2018-07-19 15:04:54	58.49779167	-136.01446944	213	Abundance	0	0	1	0	Good	LFT	2018-09-25	SO-2017.1	0
SO_C_20180719_A_0151.JPG	2018-07-19 15:04:55	58.49780000	-136.01531111	212	Abundance	0	0	1	0	Good	LFT	2018-09-25	SO-2017.1	0
SO_C_20180719_A_0152.JPG	2018-07-19 15:04:56	58.49781111	-136.01615000	211	Abundance	1	0	1	0	Good	LFT	2018-09-25	SO-2017.1	0
SO_C_20180719_A_0153.JPG	2018-07-19 15:04:57	58.49782222	-136.01698889	211	Abundance	0	0	1	0	Good	LFT	2018-09-25	SO-2017.1	0
SO_C_20180719_A_0154.JPG	2018-07-19 15:04:58	58.49783333	-136.01782222	211	Abundance	0	0	1	0	Good	LFT	2018-09-25	SO-2017.1	0
SO_C_20180719_A_0155.JPG	2018-07-19 15:04:59	58.49784722	-136.01865556	211	Abundance	0	0	1	0	Good	LFT	2018-09-25	SO-2017.1	0
SO_C_20180719_A_0156.JPG	2018-07-19 15:05:00	58.49786111	-136.01948611	211	Abundance	0	0	0	0	Good	LFT	2018-09-25	SO-2017.1	0
SO_C_20180719_A_0157.JPG	2018-07-19 15:05:01	58.49787500	-136.02031667	211	Abundance	0	0	0	0	Good	LFT	2018-09-25	SO-2017.1	0
SO_C_20180719_A_0158.JPG	2018-07-19 15:05:02	58.49788611	-136.02114444	211	Abundance	0	0	0	0	Good	LFT	2018-09-25	SO-2017.1	0
SO_C_20180719_A_0159.JPG	2018-07-19 15:05:03	58.49789722	-136.02197222	211	Abundance	0	0	1	0	Good	LFT	2018-09-25	SO-2017.1	0
SO_C_20180719_A_0160.JPG	2018-07-19 15:05:04	58.49790556	-136.02280000	212	Abundance	0	0	0	0	Good	LFT	2018-09-25	SO-2017.1	0
SO_C_20180719_A_0161.JPG	2018-07-19 15:05:05	58.49791944	-136.02362222	212	Abundance	0	0	0	0	Good	LFT	2018-09-25	SO-2017.1	0
SO_C_20180719_A_0162.JPG	2018-07-19 15:05:06	58.49793056	-136.02444722	212	Abundance	0	0	0	0	Good	LFT	2018-09-25	SO-2017.1	0
SO_C_20180719_A_0163.JPG	2018-07-19 15:07:39	58.50225278	-135.97785000	212	Abundance	0	0	1	0	Good	LFT	2018-09-25	SO-2017.1	0
SO_C_20180719_A_0164.JPG	2018-07-19 15:07:40	58.50218333	-135.97704722	212	Abundance	0	0	1	0	Good	LFT	2018-09-25	SO-2017.1	0
SO_C_20180719_A_0165.JPG	2018-07-19 15:07:41	58.50211944	-135.97624444	212	Abundance	0	0	1	0	Good	LFT	2018-09-25	SO-2017.1	0
SO_C_20180719_A_0166.JPG	2018-07-19 15:07:42	58.50205833	-135.97543889	211	Abundance	0	0	1	0	Good	LFT	2018-09-25	SO-2017.1	0
SO_C_20180719_A_0167.JPG	2018-07-19 15:07:43	58.50200556	-135.97462778	211	Abundance	0	0	1	0	Good	LFT	2018-09-25	SO-2017.1	0
SO_C_20180719_A_0168.JPG	2018-07-19 15:07:44	58.50196111	-135.97381389	211	Abundance	0	0	1	0	Good	LFT	2018-09-25	SO-2017.1	0
SO_C_20180719_A_0169.JPG	2018-07-19 15:07:45	58.50192778	-135.97299444	210	Abundance	0	0	1	0	Good	LFT	2018-09-25	SO-2017.1	0
SO_C_20180719_A_0170.JPG	2018-07-19 15:07:46	58.50190556	-135.97217222	210	Abundance	0	0	1	0	Good	LFT	2018-09-25	SO-2017.1	0
SO_C_20180719_A_0171.JPG	2018-07-19 15:07:47	58.50189444	-135.97134722	209	Abundance	0	0	1	0	Good	LFT	2018-09-25	SO-2017.1	0
SO_C_20180719_A_0172.JPG	2018-07-19 15:07:48	58.50188889	-135.97051944	209	Abundance	0	0	1	0	Good	LFT	2018-09-25	SO-2017.1	0
SO_C_20180719_A_0173.JPG	2018-07-19 15:07:49	58.50188889	-135.96969167	209	Abundance	0	0	0	0	Good	LFT	2018-09-25	SO-2017.1	0
SO_C_20180719_A_0174.JPG	2018-07-19 15:07:50	58.50189167	-135.96886111	208	Abundance	0	0	0	0	Good	LFT	2018-09-25	SO-2017.1	0
SO_C_20180719_A_0175.JPG	2018-07-19 15:07:51	58.50190000	-135.96803056	208	Abundance	0	0	0	0	Good	LFT	2018-09-25	SO-2017.1	0
SO_C_20180719_A_0176.JPG	2018-07-19 15:07:52	58.50191389	-135.96720556	207	Abundance	0	0	0	0	Good	LFT	2018-09-25	SO-2017.1	0
SO_C_20180719_A_0177.JPG	2018-07-19 15:07:53	58.50193056	-135.96638333	207	Abundance	0	0	0	0	Good	LFT	2018-09-25	SO-2017.1	0
SO_C_20180719_A_0178.JPG	2018-07-19 15:07:54	58.50195556	-135.96556111	207	Abundance	0	0	1	0	Good	LFT	2018-09-25	SO-2017.1	0
SO_C_20180719_A_0179.JPG	2018-07-19 15:07:55	58.50198333	-135.96474444	207	Abundance	0	0	1	0	Good	LFT	2018-09-25	SO-2017.1	0
SO_C_20180719_A_0180.JPG	2018-07-19 15:07:56	58.50201389	-135.96392778	208	Abundance	0	0	1	0	Good	LFT	2018-09-25	SO-2017.1	0
SO_C_20180719_A_0181.JPG	2018-07-19 15:07:57	58.50204722	-135.96311111	208	Abundance	0	0	1	0	Good	LFT	2018-09-25	SO-2017.1	0
SO_C_20180719_A_0182.JPG	2018-07-19 15:07:58	58.50207500	-135.96229167	209	Abundance	0	0	1	0	Good	LFT	2018-09-25	SO-2017.1	0
SO_C_20180719_A_0183.JPG	2018-07-19 15:07:59	58.50210278	-135.96147500	209	Abundance	0	0	1	0	Good	LFT	2018-09-25	SO-2017.1	0
SO_C_20180719_A_0184.JPG	2018-07-19 15:08:00	58.50212500	-135.96065000	210	Abundance	0	0	1	0	Good	LFT	2018-09-25	SO-2017.1	0
SO_C_20180719_A_0185.JPG	2018-07-19 15:08:01	58.50214167	-135.95982222	211	Abundance	0	0	1	1	Good	LFT	2018-09-25	SO-2017.1	0
SO_C_20180719_A_0186.JPG	2018-07-19 15:08:02	58.50215556	-135.95898889	211	Abundance	0	0	0	1	Good	LFT	2018-09-25	SO-2017.1	0
SO_C_20180719_A_0187.JPG	2018-07-19 15:08:03	58.50216389	-135.95815000	212	Abundance	0	0	0	1	Good	LFT	2018-09-25	SO-2017.1	0
SO_C_20180719_A_0188.JPG	2018-07-19 15:08:04	58.50216667	-135.95730556	213	Abundance	0	0	0	1	Good	LFT	2018-09-25	SO-2017.1	0
SO_C_20180719_A_0189.JPG	2018-07-19 15:08:05	58.50216667	-135.95646111	213	Abundance	0	0	0	1	Good	LFT	2018-09-25	SO-2017.1	0
SO_C_20180719_A_0190.JPG	2018-07-19 15:08:06	58.50215833	-135.95561667	213	Abundance	0	0	0	1	Good	LFT	2018-09-25	SO-2017.1	0
SO_C_20180719_A_0191.JPG	2018-07-19 15:08:07	58.50215000	-135.95476944	213	Abundance	0	0	0	1	Good	LFT	2018-09-25	SO-2017.1	0
SO_C_20180719_A_0192.JPG	2018-07-19 15:08:08	58.50213611	-135.95392222	212	Abundance	0	0	0	1	Good	LFT	2018-09-25	SO-2017.1	0
SO_C_20180719_A_0193.JPG	2018-07-19 15:08:09	58.50211944	-135.95307778	212	Abundance	0	0	1	1	Good	LFT	2018-09-25	SO-2017.1	0
SO_C_20180719_A_0194.JPG	2018-07-19 15:08:10	58.50210000	-135.95223611	211	Abundance	0	0	1	1	Good	LFT	2018-09-25	SO-2017.1	0
SO_C_20180719_A_0195.JPG	2018-07-19 15:08:11	58.50207500	-135.95140278	210	Abundance	0	0	1	0	Good	LFT	2018-09-25	SO-2017.1	0
SO_C_20180719_A_0196.JPG	2018-07-19 15:08:12	58.50204167	-135.95057500	209	Abundance	0	0	1	0	Good	LFT	2018-09-25	SO-2017.1	0
SO_C_20180719_A_0197.JPG	2018-07-19 15:08:13	58.50200278	-135.94974722	209	Abundance	0	0	1	1	Good	LFT	2018-09-25	SO-2017.1	0
SO_C_20180719_A_0198.JPG	2018-07-19 15:08:14	58.50196389	-135.94892500	209	Abundance	0	0	1	1	Good	LFT	2018-09-25	SO-2017.1	0
SO_C_20180719_A_0199.JPG	2018-07-19 15:08:15	58.50192778	-135.94810556	209	Abundance	0	0	1	1	Good	LFT	2018-09-25	SO-2017.1	0
SO_C_20180719_A_0200.JPG	2018-07-19 15:08:16	58.50189722	-135.94728889	209	Abundance	0	0	1	0	Good	LFT	2018-09-25	SO-2017.1	0
SO_C_20180719_A_0201.JPG	2018-07-19 15:08:17	58.50187500	-135.94647500	209	Abundance	0	0	0	0	Good	LFT	2018-09-25	SO-2017.1	0
SO_C_20180719_A_0202.JPG	2018-07-19 15:08:18	58.50185833	-135.94566389	209	Abundance	0	0	0	0	Good	LFT	2018-09-25	SO-2017.1	0
SO_C_20180719_A_0203.JPG	2018-07-19 15:08:19	58.50185000	-135.94485278	210	Abundance	0	0	0	0	Good	LFT	2018-09-25	SO-2017.1	0
SO_C_20180719_A_0204.JPG	2018-07-19 15:08:20	58.50184722	-135.94404167	210	Abundance	0	0	1	0	Good	LFT	2018-09-25	SO-2017.1	0
SO_C_20180719_A_0205.JPG	2018-07-19 15:08:21	58.50185000	-135.94323333	211	Abundance	0	0	0	0	Good	LFT	2018-09-25	SO-2017.1	0
SO_C_20180719_A_0206.JPG	2018-07-19 15:08:22	58.50185556	-135.94242500	211	Abundance	0	0	0	0	Good	LFT	2018-09-25	SO-2017.1	0
SO_C_20180719_A_0207.JPG	2018-07-19 15:08:23	58.50186944	-135.94161389	212	Abundance	0	0	1	0	Good	LFT	2018-09-25	SO-2017.1	0
SO_C_20180719_A_0208.JPG	2018-07-19 15:08:24	58.50189167	-135.94079722	213	Abundance	0	0	1	0	Good	LFT	2018-09-25	SO-2017.1	0
SO_C_20180719_A_0209.JPG	2018-07-19 15:08:25	58.50192500	-135.93998056	213	Abundance	0	0	1	0	Good	LFT	2018-09-25	SO-2017.1	0
SO_C_20180719_A_0210.JPG	2018-07-19 15:08:26	58.50195556	-135.93916111	213	Abundance	0	0	0	0	Good	LFT	2018-09-25	SO-2017.1	0
SO_C_20180719_A_0211.JPG	2018-07-19 15:08:27	58.50198889	-135.93833889	214	Abundance	0	0	1	0	Good	LFT	2018-09-25	SO-2017.1	0
SO_C_20180719_A_0212.JPG	2018-07-19 15:08:28	58.50201944	-135.93751667	214	Abundance	0	0	1	0	Good	LFT	2018-09-25	SO-2017.1	0
SO_C_20180719_A_0213.JPG	2018-07-19 15:08:29	58.50205278	-135.93669444	215	Abundance	0	0	1	0	Good	LFT	2018-09-25	SO-2017.1	0
SO_C_20180719_A_0214.JPG	2018-07-19 15:08:30	58.50208611	-135.93586944	215	Abundance	0	0	0	0	Good	LFT	2018-09-25	SO-2017.1	0
SO_C_20180719_A_0215.JPG	2018-07-19 15:08:31	58.50211389	-135.93504444	216	Abundance	0	0	0	0	Good	LFT	2018-09-25	SO-2017.1	0
SO_C_20180719_A_0216.JPG	2018-07-19 15:08:32	58.50214167	-135.93421667	217	Abundance	0	0	0	0	Good	LFT	2018-09-25	SO-2017.1	0
SO_C_20180719_A_0217.JPG	2018-07-19 15:08:33	58.50216389	-135.93338889	217	Abundance	0	0	0	0	Good	LFT	2018-09-25	SO-2017.1	0
SO_C_20180719_A_0218.JPG	2018-07-19 15:08:34	58.50218889	-135.93256111	217	Abundance	0	0	0	0	Good	LFT	2018-09-25	SO-2017.1	0
SO_C_20180719_A_0219.JPG	2018-07-19 15:08:35	58.50220833	-135.93173056	218	Abundance	0	0	0	0	Good	LFT	2018-09-25	SO-2017.1	0
SO_C_20180719_A_0220.JPG	2018-07-19 15:08:36	58.50222500	-135.93090000	218	Abundance	0	0	0	0	Good	LFT	2018-09-25	SO-2017.1	0
SO_C_20180719_A_0221.JPG	2018-07-19 15:08:37	58.50223889	-135.93007222	218	Abundance	0	0	0	0	Good	LFT	2018-09-25	SO-2017.1	0
SO_C_20180719_A_0222.JPG	2018-07-19 15:08:38	58.50224444	-135.92924167	218	Abundance	0	0	0	0	Good	LFT	2018-09-25	SO-2017.1	0
SO_C_20180719_A_0223.JPG	2018-07-19 15:08:39	58.50224722	-135.92841667	218	Abundance	0	0	1	0	Good	LFT	2018-09-25	SO-2017.1	0
SO_C_20180719_A_0224.JPG	2018-07-19 15:08:40	58.50224167	-135.92759167	218	Abundance	0	0	1	0	Good	LFT	2018-09-25	SO-2017.1	0
SO_C_20180719_A_0225.JPG	2018-07-19 15:08:41	58.50223333	-135.92676667	218	Abundance	0	0	0	0	Good	LFT	2018-09-25	SO-2017.1	0
SO_C_20180719_A_0226.JPG	2018-07-19 15:08:42	58.50222500	-135.92594444	218	Abundance	0	0	0	0	Good	LFT	2018-09-25	SO-2017.1	0
SO_C_20180719_A_0227.JPG	2018-07-19 15:08:43	58.50221389	-135.92512222	218	Abundance	0	0	0	0	Good	LFT	2018-09-25	SO-2017.1	0
SO_C_20180719_A_0228.JPG	2018-07-19 15:08:44	58.50220278	-135.92430278	218	Abundance	0	0	0	0	Good	LFT	2018-09-25	SO-2017.1	0
SO_C_20180719_A_0229.JPG	2018-07-19 15:08:45	58.50218889	-135.92347778	218	Abundance	0	0	0	0	Good	LFT	2018-09-25	SO-2017.1	0
SO_C_20180719_A_0230.JPG	2018-07-19 15:08:46	58.50217778	-135.92265556	218	Abundance	0	0	0	0	Good	LFT	2018-09-25	SO-2017.1	0
SO_C_20180719_A_0231.JPG	2018-07-19 15:08:47	58.50216944	-135.92182778	218	Abundance	0	0	0	0	Good	LFT	2018-09-25	SO-2017.1	0
SO_C_20180719_A_0232.JPG	2018-07-19 15:08:48	58.50215833	-135.92100000	218	Abundance	0	0	0	0	Good	LFT	2018-09-25	SO-2017.1	0
SO_C_20180719_A_0233.JPG	2018-07-19 15:08:49	58.50215278	-135.92016944	218	Abundance	0	0	0	0	Good	LFT	2018-09-25	SO-2017.1	0
SO_C_20180719_A_0234.JPG	2018-07-19 15:08:50	58.50214444	-135.91933889	218	Abundance	0	0	0	0	Good	LFT	2018-09-25	SO-2017.1	0
SO_C_20180719_A_0235.JPG	2018-07-19 15:08:51	58.50214167	-135.91850833	219	Abundance	0	0	0	0	Good	LFT	2018-09-25	SO-2017.1	0
SO_C_20180719_A_0236.JPG	2018-07-19 15:08:52	58.50213611	-135.91767222	219	Abundance	0	0	0	0	Good	LFT	2018-09-25	SO-2017.1	0
SO_C_20180719_A_0237.JPG	2018-07-19 15:08:53	58.50213056	-135.91683611	219	Abundance	0	0	0	0	Good	LFT	2018-09-25	SO-2017.1	0
SO_C_20180719_A_0238.JPG	2018-07-19 15:08:54	58.50212778	-135.91599722	219	Abundance	0	0	0	0	Good	LFT	2018-09-25	SO-2017.1	0
SO_C_20180719_A_0239.JPG	2018-07-19 15:08:55	58.50213056	-135.91515278	219	Abundance	0	0	0	0	Good	LFT	2018-09-25	SO-2017.1	0
SO_C_20180719_A_0240.JPG	2018-07-19 15:08:56	58.50213333	-135.91430556	219	Abundance	0	0	0	0	Good	LFT	2018-09-25	SO-2017.1	0
SO_C_20180719_A_0241.JPG	2018-07-19 15:08:57	58.50213611	-135.91345278	219	Abundance	0	0	0	0	Good	LFT	2018-09-25	SO-2017.1	0
SO_C_20180719_A_0242.JPG	2018-07-19 15:08:58	58.50213333	-135.91260278	219	Abundance	0	0	1	0	Good	LFT	2018-09-25	SO-2017.1	0
SO_C_20180719_A_0243.JPG	2018-07-19 15:08:59	58.50213333	-135.91175000	219	Abundance	0	0	1	0	Good	LFT	2018-09-25	SO-2017.1	0
SO_C_20180719_A_0244.JPG	2018-07-19 15:09:00	58.50213056	-135.91089722	218	Abundance	0	0	0	0	Good	LFT	2018-09-25	SO-2017.1	0
SO_C_20180719_A_0245.JPG	2018-07-19 15:09:01	58.50212778	-135.91005000	218	Abundance	0	0	0	0	Good	LFT	2018-09-25	SO-2017.1	0
SO_C_20180719_A_0246.JPG	2018-07-19 15:09:02	58.50212500	-135.90920278	217	Abundance	0	0	0	0	Good	LFT	2018-09-25	SO-2017.1	0
SO_C_20180719_A_0247.JPG	2018-07-19 15:09:03	58.50212222	-135.90835833	217	Abundance	0	0	0	0	Good	LFT	2018-09-25	SO-2017.1	0
SO_C_20180719_A_0248.JPG	2018-07-19 15:09:04	58.50211944	-135.90751667	217	Abundance	0	0	1	1	Good	LFT	2018-09-25	SO-2017.1	0
SO_C_20180719_A_0249.JPG	2018-07-19 15:09:05	58.50211667	-135.90668056	217	Abundance	0	0	1	1	Good	LFT	2018-09-25	SO-2017.1	0
SO_C_20180719_A_0250.JPG	2018-07-19 15:09:06	58.50211389	-135.90585000	217	Abundance	0	0	1	1	Good	LFT	2018-09-25	SO-2017.1	0
SO_C_20180719_A_0251.JPG	2018-07-19 15:09:07	58.50211111	-135.90502222	217	Abundance	0	0	0	1	Good	LFT	2018-09-25	SO-2017.1	0
SO_C_20180719_A_0252.JPG	2018-07-19 15:09:08	58.50211111	-135.90419444	217	Abundance	0	0	0	1	Good	LFT	2018-09-25	SO-2017.1	0
SO_C_20180719_A_0253.JPG	2018-07-19 15:09:09	58.50211944	-135.90336667	218	Abundance	0	0	0	1	Good	LFT	2018-09-25	SO-2017.1	0
SO_C_20180719_A_0254.JPG	2018-07-19 15:09:10	58.50213056	-135.90253611	218	Abundance	0	0	0	1	Good	LFT	2018-09-25	SO-2017.1	0
SO_C_20180719_A_0255.JPG	2018-07-19 15:09:11	58.50215000	-135.90170556	219	Abundance	0	0	0	1	Good	LFT	2018-09-25	SO-2017.1	0
SO_C_20180719_A_0256.JPG	2018-07-19 15:09:12	58.50216944	-135.90087500	219	Abundance	0	0	0	1	Good	LFT	2018-09-25	SO-2017.1	0
SO_C_20180719_A_0257.JPG	2018-07-19 15:09:13	58.50218889	-135.90003611	220	Abundance	0	0	0	1	Good	LFT	2018-09-25	SO-2017.1	0
SO_C_20180719_A_0258.JPG	2018-07-19 15:09:14	58.50220556	-135.89919167	220	Abundance	0	0	0	1	Good	LFT	2018-09-25	SO-2017.1	0
SO_C_20180719_A_0259.JPG	2018-07-19 15:09:15	58.50222222	-135.89834444	221	Abundance	0	0	0	1	Good	LFT	2018-09-25	SO-2017.1	0
SO_C_20180719_A_0260.JPG	2018-07-19 15:09:16	58.50223611	-135.89749167	221	Abundance	0	0	0	1	Good	LFT	2018-09-25	SO-2017.1	0
SO_C_20180719_A_0261.JPG	2018-07-19 15:09:17	58.50225278	-135.89663333	222	Abundance	0	0	0	1	Good	LFT	2018-09-25	SO-2017.1	0
SO_C_20180719_A_0262.JPG	2018-07-19 15:09:18	58.50226944	-135.89576667	222	Abundance	0	0	0	1	Good	LFT	2018-09-25	SO-2017.1	0
SO_C_20180719_A_0263.JPG	2018-07-19 15:09:19	58.50228333	-135.89490000	221	Abundance	0	0	0	1	Good	LFT	2018-09-25	SO-2017.1	0
SO_C_20180719_A_0264.JPG	2018-07-19 15:09:20	58.50229444	-135.89403056	221	Abundance	0	0	0	1	Good	LFT	2018-09-25	SO-2017.1	0
SO_C_20180719_A_0265.JPG	2018-07-19 15:09:21	58.50230278	-135.89316667	220	Abundance	0	0	0	1	Good	LFT	2018-09-25	SO-2017.1	0
SO_C_20180719_A_0266.JPG	2018-07-19 15:09:22	58.50231111	-135.89230556	219	Abundance	0	0	0	1	Good	LFT	2018-09-25	SO-2017.1	0
SO_C_20180719_A_0267.JPG	2018-07-19 15:09:23	58.50231667	-135.89145000	218	Abundance	0	0	0	1	Good	LFT	2018-09-25	SO-2017.1	0
SO_C_20180719_A_0268.JPG	2018-07-19 15:09:24	58.50231944	-135.89059722	218	Abundance	0	0	0	1	Good	LFT	2018-09-25	SO-2017.1	0
SO_C_20180719_A_0269.JPG	2018-07-19 15:09:25	58.50232222	-135.88975000	218	Abundance	0	0	1	1	Good	LFT	2018-09-25	SO-2017.1	0
SO_C_20180719_A_0270.JPG	2018-07-19 15:09:26	58.50232222	-135.88890278	217	Abundance	0	0	0	0	Good	LFT	2018-09-25	SO-2017.1	0
SO_C_20180719_A_0271.JPG	2018-07-19 15:09:27	58.50231944	-135.88805556	217	Abundance	0	0	1	0	Good	LFT	2018-09-25	SO-2017.1	0
SO_C_20180719_A_0272.JPG	2018-07-19 15:09:28	58.50231667	-135.88720556	218	Abundance	0	0	0	0	Good	LFT	2018-09-25	SO-2017.1	0
SO_C_20180719_A_0273.JPG	2018-07-19 15:09:29	58.50231389	-135.88635833	218	Abundance	0	0	0	0	Good	LFT	2018-09-25	SO-2017.1	0
SO_C_20180719_A_0274.JPG	2018-07-19 15:09:30	58.50231389	-135.88550556	218	Abundance	0	0	1	0	Good	LFT	2018-09-25	SO-2017.1	0
SO_C_20180719_A_0275.JPG	2018-07-19 15:09:31	58.50231111	-135.88465278	218	Abundance	0	0	0	0	Good	LFT	2018-09-25	SO-2017.1	0
SO_C_20180719_A_0276.JPG	2018-07-19 15:09:32	58.50231111	-135.88380000	218	Abundance	0	0	0	0	Good	LFT	2018-09-25	SO-2017.1	0
SO_C_20180719_A_0277.JPG	2018-07-19 15:09:33	58.50231111	-135.88294167	218	Abundance	0	0	0	0	Good	LFT	2018-09-25	SO-2017.1	0
SO_C_20180719_A_0278.JPG	2018-07-19 15:09:34	58.50231389	-135.88208056	218	Abundance	0	0	0	0	Good	LFT	2018-09-25	SO-2017.1	0
SO_C_20180719_A_0279.JPG	2018-07-19 15:09:35	58.50231389	-135.88121944	218	Abundance	0	0	0	0	Good	LFT	2018-09-25	SO-2017.1	0
SO_C_20180719_A_0280.JPG	2018-07-19 15:09:36	58.50231111	-135.88035833	218	Abundance	0	0	1	1	Good	LFT	2018-09-25	SO-2017.1	0
SO_C_20180719_A_0281.JPG	2018-07-19 15:09:37	58.50230833	-135.87949722	218	Abundance	0	0	0	1	Good	LFT	2018-09-25	SO-2017.1	0
SO_C_20180719_A_0282.JPG	2018-07-19 15:09:38	58.50230556	-135.87863611	218	Abundance	0	0	0	0	Good	LFT	2018-09-25	SO-2017.1	0
SO_C_20180719_A_0283.JPG	2018-07-19 15:09:39	58.50230833	-135.87777500	218	Abundance	0	0	0	1	Good	LFT	2018-09-25	SO-2017.1	0
SO_C_20180719_A_0284.JPG	2018-07-19 15:11:23	58.50606667	-135.90008333	218	Abundance	0	0	0	1	Good	LFT	2018-09-25	SO-2017.1	0
SO_C_20180719_A_0285.JPG	2018-07-19 15:11:24	58.50605556	-135.90088333	218	Abundance	0	0	0	1	Good	LFT	2018-09-25	SO-2017.1	0
SO_C_20180719_A_0286.JPG	2018-07-19 15:11:25	58.50605833	-135.90168611	218	Abundance	0	0	0	1	Good	LFT	2018-09-25	SO-2017.1	0
SO_C_20180719_A_0287.JPG	2018-07-19 15:11:26	58.50607222	-135.90249167	217	Abundance	0	0	0	1	Good	LFT	2018-09-25	SO-2017.1	0
SO_C_20180719_A_0288.JPG	2018-07-19 15:11:27	58.50609444	-135.90330000	217	Abundance	0	0	0	1	Good	LFT	2018-09-25	SO-2017.1	0
SO_C_20180719_A_0289.JPG	2018-07-19 15:11:28	58.50611111	-135.90410556	217	Abundance	0	0	0	1	Good	LFT	2018-09-25	SO-2017.1	0
SO_C_20180719_A_0290.JPG	2018-07-19 15:11:29	58.50611667	-135.90491111	216	Abundance	0	0	0	1	Good	LFT	2018-09-25	SO-2017.1	0
SO_C_20180719_A_0291.JPG	2018-07-19 15:11:30	58.50611389	-135.90571389	216	Abundance	0	0	0	1	Good	LFT	2018-09-25	SO-2017.1	0
SO_C_20180719_A_0292.JPG	2018-07-19 15:11:31	58.50610833	-135.90651667	216	Abundance	0	0	0	1	Good	LFT	2018-09-25	SO-2017.1	0
SO_C_20180719_A_0293.JPG	2018-07-19 15:11:32	58.50609722	-135.90731667	216	Abundance	0	0	1	1	Good	LFT	2018-09-25	SO-2017.1	0
SO_C_20180719_A_0294.JPG	2018-07-19 15:11:33	58.50608056	-135.90811944	215	Abundance	0	0	1	0	Good	LFT	2018-09-25	SO-2017.1	0
SO_C_20180719_A_0295.JPG	2018-07-19 15:11:34	58.50605833	-135.90891944	215	Abundance	0	0	1	0	Good	LFT	2018-09-25	SO-2017.1	0
SO_C_20180719_A_0296.JPG	2018-07-19 15:11:35	58.50603333	-135.90971667	215	Abundance	0	0	1	0	Good	LFT	2018-09-25	SO-2017.1	0
SO_C_20180719_A_0297.JPG	2018-07-19 15:11:36	58.50600000	-135.91051111	215	Abundance	0	0	0	0	Good	LFT	2018-09-25	SO-2017.1	0
SO_C_20180719_A_0298.JPG	2018-07-19 15:11:37	58.50596667	-135.91130556	215	Abundance	0	0	0	0	Good	LFT	2018-09-25	SO-2017.1	0
SO_C_20180719_A_0299.JPG	2018-07-19 15:11:38	58.50593056	-135.91210278	215	Abundance	0	0	0	0	Good	LFT	2018-09-25	SO-2017.1	0
SO_C_20180719_A_0300.JPG	2018-07-19 15:11:39	58.50589167	-135.91290000	215	Abundance	0	0	0	0	Good	LFT	2018-09-25	SO-2017.1	0
SO_C_20180719_A_0301.JPG	2018-07-19 15:11:40	58.50585000	-135.91370000	215	Abundance	0	0	0	0	Good	LFT	2018-09-25	SO-2017.1	0
SO_C_20180719_A_0302.JPG	2018-07-19 15:11:41	58.50581111	-135.91450556	215	Abundance	0	0	0	0	Good	LFT	2018-09-25	SO-2017.1	0
SO_C_20180719_A_0303.JPG	2018-07-19 15:11:42	58.50577778	-135.91531111	215	Abundance	0	0	0	0	Good	LFT	2018-09-25	SO-2017.1	0
SO_C_20180719_A_0304.JPG	2018-07-19 15:11:43	58.50575000	-135.91612222	215	Abundance	0	0	0	0	Good	LFT	2018-09-25	SO-2017.1	0
SO_C_20180719_A_0305.JPG	2018-07-19 15:11:44	58.50572778	-135.91693333	215	Abundance	0	0	1	0	Good	LFT	2018-09-25	SO-2017.1	0
SO_C_20180719_A_0306.JPG	2018-07-19 15:11:45	58.50570556	-135.91774444	215	Abundance	0	0	0	0	Good	LFT	2018-09-25	SO-2017.1	0
SO_C_20180719_A_0307.JPG	2018-07-19 15:11:46	58.50568333	-135.91855833	215	Abundance	0	0	0	0	Good	LFT	2018-09-25	SO-2017.1	0
SO_C_20180719_A_0308.JPG	2018-07-19 15:11:47	58.50566667	-135.91937778	215	Abundance	0	0	1	0	Good	LFT	2018-09-25	SO-2017.1	0
SO_C_20180719_A_0309.JPG	2018-07-19 15:11:48	58.50565000	-135.92020556	215	Abundance	0	0	0	0	Good	LFT	2018-09-25	SO-2017.1	0
SO_C_20180719_A_0310.JPG	2018-07-19 15:11:49	58.50563056	-135.92102778	214	Abundance	0	0	0	0	Good	LFT	2018-09-25	SO-2017.1	0
SO_C_20180719_A_0311.JPG	2018-07-19 15:11:50	58.50561111	-135.92185278	214	Abundance	0	0	0	0	Good	LFT	2018-09-25	SO-2017.1	0
SO_C_20180719_A_0312.JPG	2018-07-19 15:11:51	58.50559722	-135.92267778	213	Abundance	0	0	0	0	Good	LFT	2018-09-25	SO-2017.1	0
SO_C_20180719_A_0313.JPG	2018-07-19 15:11:52	58.50558611	-135.92350000	213	Abundance	0	0	0	0	Good	LFT	2018-09-25	SO-2017.1	0
SO_C_20180719_A_0314.JPG	2018-07-19 15:11:53	58.50557500	-135.92432222	213	Abundance	0	0	0	0	Good	LFT	2018-09-25	SO-2017.1	0
SO_C_20180719_A_0315.JPG	2018-07-19 15:11:54	58.50556111	-135.92514167	212	Abundance	0	0	0	0	Good	LFT	2018-09-25	SO-2017.1	0
SO_C_20180719_A_0316.JPG	2018-07-19 15:11:55	58.50555000	-135.92596111	212	Abundance	0	0	0	0	Good	LFT	2018-09-25	SO-2017.1	0
SO_C_20180719_A_0317.JPG	2018-07-19 15:11:56	58.50553889	-135.92677778	212	Abundance	0	0	0	0	Good	LFT	2018-09-25	SO-2017.1	0
SO_C_20180719_A_0318.JPG	2018-07-19 15:11:57	58.50553333	-135.92759167	212	Abundance	0	0	0	0	Good	LFT	2018-09-25	SO-2017.1	0
SO_C_20180719_A_0319.JPG	2018-07-19 15:11:58	58.50552778	-135.92840278	212	Abundance	0	0	0	0	Good	LFT	2018-09-25	SO-2017.1	0
SO_C_20180719_A_0320.JPG	2018-07-19 15:11:59	58.50553056	-135.92921389	212	Abundance	0	0	0	0	Good	LFT	2018-09-25	SO-2017.1	0
SO_C_20180719_A_0321.JPG	2018-07-19 15:12:00	58.50553333	-135.93002500	212	Abundance	0	0	0	0	Good	LFT	2018-09-25	SO-2017.1	0
SO_C_20180719_A_0322.JPG	2018-07-19 15:12:01	58.50554167	-135.93083611	213	Abundance	0	0	1	0	Good	LFT	2018-09-25	SO-2017.1	0
SO_C_20180719_A_0323.JPG	2018-07-19 15:12:02	58.50555833	-135.93164722	213	Abundance	0	0	0	0	Good	LFT	2018-09-25	SO-2017.1	0
SO_C_20180719_A_0324.JPG	2018-07-19 15:12:03	58.50557500	-135.93245278	213	Abundance	0	0	0	0	Good	LFT	2018-09-25	SO-2017.1	0
SO_C_20180719_A_0325.JPG	2018-07-19 15:12:04	58.50559167	-135.93326111	214	Abundance	0	0	1	0	Good	LFT	2018-09-25	SO-2017.1	0
SO_C_20180719_A_0326.JPG	2018-07-19 15:12:05	58.50560833	-135.93406667	214	Abundance	0	0	1	0	Good	LFT	2018-09-25	SO-2017.1	0
SO_C_20180719_A_0327.JPG	2018-07-19 15:12:06	58.50561944	-135.93487222	214	Abundance	0	0	0	0	Good	LFT	2018-09-25	SO-2017.1	0
SO_C_20180719_A_0328.JPG	2018-07-19 15:12:07	58.50562500	-135.93567500	214	Abundance	0	0	0	0	Good	LFT	2018-09-25	SO-2017.1	0
SO_C_20180719_A_0329.JPG	2018-07-19 15:12:08	58.50563056	-135.93648056	214	Abundance	0	0	0	0	Good	LFT	2018-09-25	SO-2017.1	0
SO_C_20180719_A_0330.JPG	2018-07-19 15:12:09	58.50563056	-135.93728333	214	Abundance	0	0	0	0	Good	LFT	2018-09-25	SO-2017.1	0
SO_C_20180719_A_0331.JPG	2018-07-19 15:12:10	58.50563056	-135.93808889	215	Abundance	0	0	0	0	Good	LFT	2018-09-25	SO-2017.1	0
SO_C_20180719_A_0332.JPG	2018-07-19 15:12:11	58.50562778	-135.93890000	215	Abundance	0	0	0	0	Good	LFT	2018-09-25	SO-2017.1	0
SO_C_20180719_A_0333.JPG	2018-07-19 15:12:12	58.50562778	-135.93970833	215	Abundance	0	0	0	0	Good	LFT	2018-09-25	SO-2017.1	0
SO_C_20180719_A_0334.JPG	2018-07-19 15:12:13	58.50562500	-135.94051944	215	Abundance	0	0	0	0	Good	LFT	2018-09-25	SO-2017.1	0
SO_C_20180719_A_0335.JPG	2018-07-19 15:12:14	58.50561944	-135.94132778	215	Abundance	0	0	0	0	Good	LFT	2018-09-25	SO-2017.1	0
SO_C_20180719_A_0336.JPG	2018-07-19 15:12:15	58.50561667	-135.94213889	216	Abundance	0	0	0	0	Good	LFT	2018-09-25	SO-2017.1	0
SO_C_20180719_A_0337.JPG	2018-07-19 15:12:16	58.50561111	-135.94295000	216	Abundance	1	0	0	0	Good	LFT	2018-09-25	SO-2017.1	0
SO_C_20180719_A_0338.JPG	2018-07-19 15:12:17	58.50560000	-135.94375833	216	Abundance	0	0	0	0	Good	LFT	2018-09-25	SO-2017.1	0
SO_C_20180719_A_0339.JPG	2018-07-19 15:12:18	58.50558611	-135.94456667	216	Abundance	0	0	0	0	Good	LFT	2018-09-25	SO-2017.1	0
SO_C_20180719_A_0340.JPG	2018-07-19 15:12:19	58.50556944	-135.94538056	217	Abundance	0	0	0	0	Good	LFT	2018-09-25	SO-2017.1	0
SO_C_20180719_A_0341.JPG	2018-07-19 15:12:20	58.50555278	-135.94619167	217	Abundance	0	0	1	0	Good	LFT	2018-09-25	SO-2017.1	0
SO_C_20180719_A_0342.JPG	2018-07-19 15:12:21	58.50553056	-135.94700556	217	Abundance	0	0	0	0	Good	LFT	2018-09-25	SO-2017.1	0
SO_C_20180719_A_0343.JPG	2018-07-19 15:12:22	58.50551111	-135.94782222	217	Abundance	0	0	0	0	Good	LFT	2018-09-25	SO-2017.1	0
SO_C_20180719_A_0344.JPG	2018-07-19 15:12:23	58.50548889	-135.94864167	217	Abundance	0	0	1	0	Good	LFT	2018-09-25	SO-2017.1	0
SO_C_20180719_A_0345.JPG	2018-07-19 15:12:24	58.50547222	-135.94946667	217	Abundance	0	0	1	0	Good	LFT	2018-09-25	SO-2017.1	0
SO_C_20180719_A_0346.JPG	2018-07-19 15:12:25	58.50545278	-135.95029167	217	Abundance	0	0	1	0	Good	LFT	2018-09-25	SO-2017.1	0
SO_C_20180719_A_0347.JPG	2018-07-19 15:12:26	58.50543889	-135.95111667	217	Abundance	0	0	1	0	Good	LFT	2018-09-25	SO-2017.1	0
SO_C_20180719_A_0348.JPG	2018-07-19 15:12:27	58.50542222	-135.95193889	217	Abundance	0	0	1	0	Good	LFT	2018-09-25	SO-2017.1	0
SO_C_20180719_A_0349.JPG	2018-07-19 15:12:28	58.50540833	-135.95276389	216	Abundance	0	0	1	0	Good	LFT	2018-09-25	SO-2017.1	0
SO_C_20180719_A_0350.JPG	2018-07-19 15:12:29	58.50540000	-135.95358333	216	Abundance	0	0	1	0	Good	LFT	2018-09-25	SO-2017.1	0
SO_C_20180719_A_0351.JPG	2018-07-19 15:12:30	58.50539722	-135.95440556	216	Abundance	0	0	1	0	Good	LFT	2018-09-25	SO-2017.1	0
SO_C_20180719_A_0352.JPG	2018-07-19 15:12:31	58.50539722	-135.95523333	216	Abundance	0	0	1	0	Good	LFT	2018-09-25	SO-2017.1	0
SO_C_20180719_A_0353.JPG	2018-07-19 15:12:32	58.50539722	-135.95605556	215	Abundance	2	0	1	0	Good	LFT	2018-09-25	SO-2017.1	0
SO_C_20180719_A_0354.JPG	2018-07-19 15:12:33	58.50539444	-135.95687778	215	Abundance	1	0	0	0	Good	LFT	2018-09-25	SO-2017.1	0
SO_C_20180719_A_0355.JPG	2018-07-19 15:12:34	58.50538889	-135.95770000	215	Abundance	0	0	0	0	Good	LFT	2018-09-25	SO-2017.1	0
SO_C_20180719_A_0356.JPG	2018-07-19 15:12:35	58.50538611	-135.95851944	215	Abundance	0	0	0	0	Good	LFT	2018-09-25	SO-2017.1	0
SO_C_20180719_A_0357.JPG	2018-07-19 15:12:36	58.50538333	-135.95933889	215	Abundance	0	0	0	0	Good	LFT	2018-09-25	SO-2017.1	0
SO_C_20180719_A_0358.JPG	2018-07-19 15:12:37	58.50538056	-135.96015833	215	Abundance	0	0	1	0	Good	LFT	2018-09-25	SO-2017.1	0
SO_C_20180719_A_0359.JPG	2018-07-19 15:12:38	58.50538056	-135.96097500	214	Abundance	0	0	1	0	Good	LFT	2018-09-25	SO-2017.1	0
SO_C_20180719_A_0360.JPG	2018-07-19 15:12:39	58.50538333	-135.96179167	214	Abundance	0	0	1	0	Good	LFT	2018-09-25	SO-2017.1	0
SO_C_20180719_A_0361.JPG	2018-07-19 15:12:40	58.50538611	-135.96260833	214	Abundance	0	0	1	0	Good	LFT	2018-09-25	SO-2017.1	0
SO_C_20180719_A_0362.JPG	2018-07-19 15:12:41	58.50539444	-135.96342778	215	Abundance	0	0	1	0	Good	LFT	2018-09-25	SO-2017.1	0
SO_C_20180719_A_0363.JPG	2018-07-19 15:12:42	58.50540278	-135.96424444	215	Abundance	0	0	0	0	Good	LFT	2018-09-25	SO-2017.1	0
SO_C_20180719_A_0364.JPG	2018-07-19 15:12:43	58.50540833	-135.96506111	215	Abundance	0	0	0	0	Good	LFT	2018-09-25	SO-2017.1	0
SO_C_20180719_A_0365.JPG	2018-07-19 15:12:44	58.50541667	-135.96587778	215	Abundance	0	0	1	0	Good	LFT	2018-09-25	SO-2017.1	0
SO_C_20180719_A_0366.JPG	2018-07-19 15:12:45	58.50542222	-135.96669444	215	Abundance	2	2	1	0	Good	LFT	2018-09-25	SO-2017.1	0
SO_C_20180719_A_0367.JPG	2018-07-19 15:12:46	58.50542500	-135.96751111	215	Abundance	0	0	1	0	Good	LFT	2018-09-25	SO-2017.1	0
SO_C_20180719_A_0368.JPG	2018-07-19 15:12:47	58.50542500	-135.96833056	216	Abundance	0	0	1	0	Good	LFT	2018-09-25	SO-2017.1	0
SO_C_20180719_A_0369.JPG	2018-07-19 15:12:48	58.50542778	-135.96915000	216	Abundance	0	0	1	0	Good	LFT	2018-09-25	SO-2017.1	0
SO_C_20180719_A_0370.JPG	2018-07-19 15:12:49	58.50542778	-135.96996667	216	Abundance	0	0	0	0	Good	LFT	2018-09-25	SO-2017.1	0
SO_C_20180719_A_0371.JPG	2018-07-19 15:12:50	58.50542778	-135.97078611	216	Abundance	0	0	0	0	Good	LFT	2018-09-25	SO-2017.1	0
SO_C_20180719_A_0372.JPG	2018-07-19 15:12:51	58.50541944	-135.97160556	217	Abundance	0	0	0	0	Good	LFT	2018-09-25	SO-2017.1	0
SO_C_20180719_A_0373.JPG	2018-07-19 15:12:52	58.50540833	-135.97242222	217	Abundance	0	0	0	0	Good	LFT	2018-09-25	SO-2017.1	0
SO_C_20180719_A_0374.JPG	2018-07-19 15:12:53	58.50539444	-135.97324444	217	Abundance	0	0	1	0	Good	LFT	2018-09-25	SO-2017.1	0
SO_C_20180719_A_0375.JPG	2018-07-19 15:12:54	58.50537778	-135.97406667	218	Abundance	0	0	1	0	Good	LFT	2018-09-25	SO-2017.1	0
SO_C_20180719_A_0376.JPG	2018-07-19 15:12:55	58.50535833	-135.97488611	218	Abundance	0	0	1	0	Good	LFT	2018-09-25	SO-2017.1	0
SO_C_20180719_A_0377.JPG	2018-07-19 15:12:56	58.50533889	-135.97570833	218	Abundance	0	0	1	0	Good	LFT	2018-09-25	SO-2017.1	0
SO_C_20180719_A_0378.JPG	2018-07-19 15:12:57	58.50531944	-135.97653333	218	Abundance	1	0	1	0	Good	LFT	2018-09-25	SO-2017.1	0
SO_C_20180719_A_0379.JPG	2018-07-19 15:12:58	58.50529722	-135.97735833	218	Abundance	1	0	0	0	Good	LFT	2018-09-25	SO-2017.1	0
SO_C_20180719_A_0380.JPG	2018-07-19 15:12:59	58.50527500	-135.97818611	217	Abundance	0	0	1	0	Good	LFT	2018-09-25	SO-2017.1	0
SO_C_20180719_A_0381.JPG	2018-07-19 15:13:00	58.50525556	-135.97901667	217	Abundance	0	0	0	0	Good	LFT	2018-09-25	SO-2017.1	0
SO_C_20180719_A_0382.JPG	2018-07-19 15:13:01	58.50523611	-135.97984167	217	Abundance	0	0	0	0	Good	LFT	2018-09-25	SO-2017.1	0
SO_C_20180719_A_0383.JPG	2018-07-19 15:13:02	58.50521944	-135.98066667	216	Abundance	0	0	0	0	Good	LFT	2018-09-25	SO-2017.1	0
SO_C_20180719_A_0384.JPG	2018-07-19 15:13:03	58.50520278	-135.98149444	216	Abundance	0	0	0	0	Good	LFT	2018-09-25	SO-2017.1	0
SO_C_20180719_A_0385.JPG	2018-07-19 15:13:04	58.50518611	-135.98232222	215	Abundance	0	0	0	0	Good	LFT	2018-09-25	SO-2017.1	0
SO_C_20180719_A_0386.JPG	2018-07-19 15:13:05	58.50516944	-135.98315000	215	Abundance	0	0	0	0	Good	LFT	2018-09-25	SO-2017.1	0
SO_C_20180719_A_0387.JPG	2018-07-19 15:13:06	58.50515278	-135.98396944	214	Abundance	0	0	0	0	Good	LFT	2018-09-25	SO-2017.1	0
SO_C_20180719_A_0388.JPG	2018-07-19 15:13:07	58.50513611	-135.98478611	214	Abundance	0	0	0	0	Good	LFT	2018-09-25	SO-2017.1	0
SO_C_20180719_A_0389.JPG	2018-07-19 15:13:08	58.50512500	-135.98560000	214	Abundance	1	0	0	0	Good	LFT	2018-09-25	SO-2017.1	0
SO_C_20180719_A_0390.JPG	2018-07-19 15:13:09	58.50511389	-135.98641111	214	Abundance	1	0	0	0	Good	LFT	2018-09-25	SO-2017.1	0
SO_C_20180719_A_0391.JPG	2018-07-19 15:13:10	58.50510556	-135.98722222	214	Abundance	0	0	0	0	Good	LFT	2018-09-25	SO-2017.1	0
SO_C_20180719_A_0392.JPG	2018-07-19 15:13:11	58.50510278	-135.98803056	214	Abundance	0	0	0	0	Good	LFT	2018-09-25	SO-2017.1	0
SO_C_20180719_A_0393.JPG	2018-07-19 15:13:12	58.50510278	-135.98884167	215	Abundance	0	0	0	0	Good	LFT	2018-09-25	SO-2017.1	0
SO_C_20180719_A_0394.JPG	2018-07-19 15:13:13	58.50510833	-135.98965556	216	Abundance	0	0	0	0	Good	LFT	2018-09-25	SO-2017.1	0
SO_C_20180719_A_0395.JPG	2018-07-19 15:13:14	58.50511667	-135.99047222	217	Abundance	0	0	0	0	Good	LFT	2018-09-25	SO-2017.1	0
SO_C_20180719_A_0396.JPG	2018-07-19 15:13:15	58.50513056	-135.99129167	217	Abundance	0	0	0	0	Good	LFT	2018-09-25	SO-2017.1	0
SO_C_20180719_A_0397.JPG	2018-07-19 15:13:16	58.50514167	-135.99211111	217	Abundance	0	0	0	0	Good	LFT	2018-09-25	SO-2017.1	0
SO_C_20180719_A_0398.JPG	2018-07-19 15:13:17	58.50515278	-135.99293333	217	Abundance	0	0	0	0	Good	LFT	2018-09-25	SO-2017.1	0
SO_C_20180719_A_0399.JPG	2018-07-19 15:13:18	58.50516389	-135.99375833	217	Abundance	0	0	0	0	Good	LFT	2018-09-25	SO-2017.1	0
SO_C_20180719_A_0400.JPG	2018-07-19 15:13:19	58.50516944	-135.99458611	217	Abundance	0	0	1	0	Good	LFT	2018-09-25	SO-2017.1	0
SO_C_20180719_A_0401.JPG	2018-07-19 15:13:20	58.50517222	-135.99541111	217	Abundance	0	0	1	0	Good	LFT	2018-09-25	SO-2017.1	0
SO_C_20180719_A_0402.JPG	2018-07-19 15:13:21	58.50517500	-135.99623611	216	Abundance	0	0	0	0	Good	LFT	2018-09-25	SO-2017.1	0
SO_C_20180719_A_0403.JPG	2018-07-19 15:13:22	58.50517500	-135.99705833	216	Abundance	0	0	0	0	Good	LFT	2018-09-25	SO-2017.1	0
SO_C_20180719_A_0404.JPG	2018-07-19 15:13:23	58.50517222	-135.99788333	215	Abundance	0	0	0	0	Good	LFT	2018-09-25	SO-2017.1	0
SO_C_20180719_A_0405.JPG	2018-07-19 15:13:24	58.50516667	-135.99870833	215	Abundance	0	0	0	0	Good	LFT	2018-09-25	SO-2017.1	0
SO_C_20180719_A_0406.JPG	2018-07-19 15:13:25	58.50515833	-135.99953056	214	Abundance	0	0	0	0	Good	LFT	2018-09-25	SO-2017.1	0
SO_C_20180719_A_0407.JPG	2018-07-19 15:13:26	58.50515000	-136.00035278	214	Abundance	0	0	0	0	Good	LFT	2018-09-25	SO-2017.1	0
SO_C_20180719_A_0408.JPG	2018-07-19 15:13:27	58.50513889	-136.00117500	214	Abundance	0	0	0	0	Good	LFT	2018-09-25	SO-2017.1	0
SO_C_20180719_A_0409.JPG	2018-07-19 15:13:28	58.50512778	-136.00199722	214	Abundance	0	0	0	0	Good	LFT	2018-09-25	SO-2017.1	0
SO_C_20180719_A_0410.JPG	2018-07-19 15:13:29	58.50511667	-136.00281944	214	Abundance	0	0	0	0	Good	LFT	2018-09-25	SO-2017.1	0
SO_C_20180719_A_0411.JPG	2018-07-19 15:13:30	58.50510833	-136.00364444	214	Abundance	0	0	0	0	Good	LFT	2018-09-25	SO-2017.1	0
SO_C_20180719_A_0412.JPG	2018-07-19 15:13:31	58.50509722	-136.00446667	214	Abundance	0	0	1	0	Good	LFT	2018-09-25	SO-2017.1	0
SO_C_20180719_A_0413.JPG	2018-07-19 15:13:32	58.50508611	-136.00528889	214	Abundance	0	0	1	0	Good	LFT	2018-09-25	SO-2017.1	0
SO_C_20180719_A_0414.JPG	2018-07-19 15:13:33	58.50507500	-136.00611389	214	Abundance	0	0	1	0	Good	LFT	2018-09-25	SO-2017.1	0
SO_C_20180719_A_0415.JPG	2018-07-19 15:13:34	58.50506111	-136.00693611	214	Abundance	0	0	1	0	Good	LFT	2018-09-25	SO-2017.1	0
SO_C_20180719_A_0416.JPG	2018-07-19 15:13:35	58.50504167	-136.00775278	214	Abundance	0	0	1	0	Good	LFT	2018-09-25	SO-2017.1	0
SO_C_20180719_A_0417.JPG	2018-07-19 15:13:36	58.50502222	-136.00856667	215	Abundance	0	0	1	0	Good	LFT	2018-09-25	SO-2017.1	0
SO_C_20180719_A_0418.JPG	2018-07-19 15:13:37	58.50500000	-136.00938056	215	Abundance	0	0	1	0	Good	LFT	2018-09-25	SO-2017.1	0
SO_C_20180719_A_0419.JPG	2018-07-19 15:15:31	58.50945556	-136.00393889	213	Abundance	0	0	0	1	Good	LFT	2018-09-25	SO-2017.1	0
SO_C_20180719_A_0420.JPG	2018-07-19 15:15:32	58.50947222	-136.00309167	212	Abundance	0	0	0	1	Good	LFT	2018-09-25	SO-2017.1	0
SO_C_20180719_A_0421.JPG	2018-07-19 15:15:33	58.50946944	-136.00224722	211	Abundance	0	0	0	1	Good	LFT	2018-09-25	SO-2017.1	0
SO_C_20180719_A_0422.JPG	2018-07-19 15:15:34	58.50944722	-136.00140833	210	Abundance	0	0	0	1	Good	LFT	2018-09-25	SO-2017.1	0
SO_C_20180719_A_0423.JPG	2018-07-19 15:15:35	58.50941111	-136.00057778	209	Abundance	0	0	0	1	Good	LFT	2018-09-25	SO-2017.1	0
SO_C_20180719_A_0424.JPG	2018-07-19 15:15:36	58.50936389	-135.99975000	208	Abundance	0	0	0	1	Good	LFT	2018-09-25	SO-2017.1	0
SO_C_20180719_A_0425.JPG	2018-07-19 15:15:37	58.50931389	-135.99893056	208	Abundance	0	0	0	1	Good	LFT	2018-09-25	SO-2017.1	0
SO_C_20180719_A_0426.JPG	2018-07-19 15:15:38	58.50926389	-135.99812500	208	Abundance	0	0	1	1	Good	LFT	2018-09-25	SO-2017.1	0
SO_C_20180719_A_0427.JPG	2018-07-19 15:15:39	58.50920833	-135.99731111	208	Abundance	0	0	1	1	Good	LFT	2018-09-25	SO-2017.1	0
SO_C_20180719_A_0428.JPG	2018-07-19 15:15:40	58.50916389	-135.99650556	208	Abundance	0	0	1	0	Good	LFT	2018-09-25	SO-2017.1	0
SO_C_20180719_A_0429.JPG	2018-07-19 15:15:41	58.50912500	-135.99570278	208	Abundance	0	0	0	0	Good	LFT	2018-09-25	SO-2017.1	0
SO_C_20180719_A_0430.JPG	2018-07-19 15:15:42	58.50909167	-135.99489722	208	Abundance	0	0	0	0	Good	LFT	2018-09-25	SO-2017.1	0
SO_C_20180719_A_0431.JPG	2018-07-19 15:15:43	58.50906389	-135.99409167	208	Abundance	0	0	0	0	Good	LFT	2018-09-25	SO-2017.1	0
SO_C_20180719_A_0432.JPG	2018-07-19 15:15:44	58.50904722	-135.99328611	209	Abundance	0	0	0	0	Good	LFT	2018-09-25	SO-2017.1	0
SO_C_20180719_A_0433.JPG	2018-07-19 15:15:45	58.50903611	-135.99247778	209	Abundance	0	0	0	0	Good	LFT	2018-09-25	SO-2017.1	0
SO_C_20180719_A_0434.JPG	2018-07-19 15:15:46	58.50903333	-135.99166667	210	Abundance	0	0	0	0	Good	LFT	2018-09-25	SO-2017.1	0
SO_C_20180719_A_0435.JPG	2018-07-19 15:15:47	58.50903333	-135.99085000	210	Abundance	0	0	0	0	Good	LFT	2018-09-25	SO-2017.1	0
SO_C_20180719_A_0436.JPG	2018-07-19 15:15:48	58.50904167	-135.99003333	210	Abundance	0	0	0	0	Good	LFT	2018-09-25	SO-2017.1	0
SO_C_20180719_A_0437.JPG	2018-07-19 15:15:49	58.50905278	-135.98921389	210	Abundance	0	0	0	0	Good	LFT	2018-09-25	SO-2017.1	0
SO_C_20180719_A_0438.JPG	2018-07-19 15:15:50	58.50906667	-135.98839444	210	Abundance	0	0	0	0	Good	LFT	2018-09-25	SO-2017.1	0
SO_C_20180719_A_0439.JPG	2018-07-19 15:15:51	58.50908333	-135.98757778	210	Abundance	0	0	0	0	Good	LFT	2018-09-25	SO-2017.1	0
SO_C_20180719_A_0440.JPG	2018-07-19 15:15:52	58.50910556	-135.98675833	210	Abundance	0	0	0	0	Good	LFT	2018-09-25	SO-2017.1	0
SO_C_20180719_A_0441.JPG	2018-07-19 15:15:53	58.50913333	-135.98593611	209	Abundance	0	0	0	0	Good	LFT	2018-09-25	SO-2017.1	0
SO_C_20180719_A_0442.JPG	2018-07-19 15:15:54	58.50916111	-135.98511667	209	Abundance	0	0	0	0	Good	LFT	2018-09-25	SO-2017.1	0
SO_C_20180719_A_0443.JPG	2018-07-19 15:15:55	58.50919167	-135.98429444	208	Abundance	0	0	0	0	Good	LFT	2018-09-25	SO-2017.1	0
SO_C_20180719_A_0444.JPG	2018-07-19 15:15:56	58.50921944	-135.98347222	207	Abundance	0	0	0	0	Good	LFT	2018-09-25	SO-2017.1	0
SO_C_20180719_A_0445.JPG	2018-07-19 15:15:57	58.50924444	-135.98265278	207	Abundance	0	0	0	0	Good	LFT	2018-09-25	SO-2017.1	0
SO_C_20180719_A_0446.JPG	2018-07-19 15:15:58	58.50926667	-135.98183333	206	Abundance	0	0	0	0	Good	LFT	2018-09-25	SO-2017.1	0
SO_C_20180719_A_0447.JPG	2018-07-19 15:15:59	58.50928333	-135.98101389	206	Abundance	0	0	0	0	Good	LFT	2018-09-25	SO-2017.1	0
SO_C_20180719_A_0448.JPG	2018-07-19 15:16:00	58.50929722	-135.98020000	205	Abundance	0	0	0	0	Good	LFT	2018-09-25	SO-2017.1	0
SO_C_20180719_A_0449.JPG	2018-07-19 15:16:01	58.50930278	-135.97938889	205	Abundance	0	0	0	0	Good	LFT	2018-09-25	SO-2017.1	0
SO_C_20180719_A_0450.JPG	2018-07-19 15:16:02	58.50930556	-135.97857500	204	Abundance	0	0	0	0	Good	LFT	2018-09-25	SO-2017.1	0
SO_C_20180719_A_0451.JPG	2018-07-19 15:16:03	58.50930000	-135.97776667	204	Abundance	0	0	0	0	Good	LFT	2018-09-25	SO-2017.1	0
SO_C_20180719_A_0452.JPG	2018-07-19 15:16:04	58.50929167	-135.97695833	204	Abundance	0	0	1	0	Good	LFT	2018-09-25	SO-2017.1	0
SO_C_20180719_A_0453.JPG	2018-07-19 15:16:05	58.50927778	-135.97615556	205	Abundance	0	0	0	0	Good	LFT	2018-09-25	SO-2017.1	0
SO_C_20180719_A_0454.JPG	2018-07-19 15:16:06	58.50925833	-135.97535278	205	Abundance	0	0	0	0	Good	LFT	2018-09-25	SO-2017.1	0
SO_C_20180719_A_0455.JPG	2018-07-19 15:16:07	58.50923889	-135.97455278	205	Abundance	0	0	0	0	Good	LFT	2018-09-25	SO-2017.1	0
SO_C_20180719_A_0456.JPG	2018-07-19 15:16:08	58.50921667	-135.97375278	206	Abundance	0	0	0	0	Good	LFT	2018-09-25	SO-2017.1	0
SO_C_20180719_A_0457.JPG	2018-07-19 15:16:09	58.50919722	-135.97296389	206	Abundance	0	0	0	0	Good	LFT	2018-09-25	SO-2017.1	0
SO_C_20180719_A_0458.JPG	2018-07-19 15:16:10	58.50916667	-135.97216667	207	Abundance	0	0	0	0	Good	LFT	2018-09-25	SO-2017.1	0
SO_C_20180719_A_0459.JPG	2018-07-19 15:16:11	58.50913611	-135.97137778	207	Abundance	0	0	0	0	Good	LFT	2018-09-25	SO-2017.1	0
SO_C_20180719_A_0460.JPG	2018-07-19 15:16:12	58.50910278	-135.97058889	208	Abundance	0	0	0	0	Good	LFT	2018-09-25	SO-2017.1	0
SO_C_20180719_A_0461.JPG	2018-07-19 15:16:13	58.50907222	-135.96980000	208	Abundance	0	0	0	0	Good	LFT	2018-09-25	SO-2017.1	0
SO_C_20180719_A_0462.JPG	2018-07-19 15:16:14	58.50904167	-135.96901389	208	Abundance	0	0	0	0	Good	LFT	2018-09-25	SO-2017.1	0
SO_C_20180719_A_0463.JPG	2018-07-19 15:16:15	58.50900556	-135.96822222	208	Abundance	0	0	0	0	Good	LFT	2018-09-25	SO-2017.1	0
SO_C_20180719_A_0464.JPG	2018-07-19 15:16:16	58.50897500	-135.96743333	209	Abundance	0	0	0	0	Good	LFT	2018-09-25	SO-2017.1	0
SO_C_20180719_A_0465.JPG	2018-07-19 15:16:17	58.50893889	-135.96664167	209	Abundance	0	0	0	0	Good	LFT	2018-09-25	SO-2017.1	0
SO_C_20180719_A_0466.JPG	2018-07-19 15:16:18	58.50890556	-135.96585000	209	Abundance	0	0	1	0	Good	LFT	2018-09-25	SO-2017.1	0
SO_C_20180719_A_0467.JPG	2018-07-19 15:16:19	58.50887500	-135.96505556	210	Abundance	0	0	1	0	Good	LFT	2018-09-25	SO-2017.1	0
SO_C_20180719_A_0468.JPG	2018-07-19 15:16:20	58.50885000	-135.96426389	210	Abundance	0	0	1	0	Good	LFT	2018-09-25	SO-2017.1	0
SO_C_20180719_A_0469.JPG	2018-07-19 15:16:21	58.50883056	-135.96346944	211	Abundance	0	0	1	0	Good	LFT	2018-09-25	SO-2017.1	0
SO_C_20180719_A_0470.JPG	2018-07-19 15:16:22	58.50881667	-135.96267222	211	Abundance	0	0	1	0	Good	LFT	2018-09-25	SO-2017.1	0
SO_C_20180719_A_0471.JPG	2018-07-19 15:16:23	58.50880556	-135.96187500	212	Abundance	0	0	1	0	Good	LFT	2018-09-25	SO-2017.1	0
SO_C_20180719_A_0472.JPG	2018-07-19 15:16:24	58.50880000	-135.96107222	212	Abundance	0	0	1	0	Good	LFT	2018-09-25	SO-2017.1	0
SO_C_20180719_A_0473.JPG	2018-07-19 15:16:25	58.50879444	-135.96026944	212	Abundance	0	0	1	0	Good	LFT	2018-09-25	SO-2017.1	0
SO_C_20180719_A_0474.JPG	2018-07-19 15:16:26	58.50879444	-135.95946389	212	Abundance	0	0	1	0	Good	LFT	2018-09-25	SO-2017.1	0
SO_C_20180719_A_0475.JPG	2018-07-19 15:16:27	58.50879444	-135.95865556	212	Abundance	0	0	1	0	Good	LFT	2018-09-25	SO-2017.1	0
SO_C_20180719_A_0476.JPG	2018-07-19 15:16:28	58.50879722	-135.95784444	212	Abundance	0	0	1	0	Good	LFT	2018-09-25	SO-2017.1	0
SO_C_20180719_A_0477.JPG	2018-07-19 15:16:29	58.50880000	-135.95703889	212	Abundance	0	0	0	0	Good	LFT	2018-09-25	SO-2017.1	0
SO_C_20180719_A_0478.JPG	2018-07-19 15:16:30	58.50880556	-135.95622778	212	Abundance	0	0	0	0	Good	LFT	2018-09-25	SO-2017.1	0
SO_C_20180719_A_0479.JPG	2018-07-19 15:16:31	58.50881111	-135.95541667	211	Abundance	0	0	1	0	Good	LFT	2018-09-25	SO-2017.1	0
SO_C_20180719_A_0480.JPG	2018-07-19 15:16:32	58.50881944	-135.95460278	211	Abundance	0	0	1	0	Good	LFT	2018-09-25	SO-2017.1	0
SO_C_20180719_A_0481.JPG	2018-07-19 15:16:33	58.50883333	-135.95379167	210	Abundance	0	0	0	0	Good	LFT	2018-09-25	SO-2017.1	0
SO_C_20180719_A_0482.JPG	2018-07-19 15:16:34	58.50884444	-135.95297778	210	Abundance	0	0	0	0	Good	LFT	2018-09-25	SO-2017.1	0
SO_C_20180719_A_0483.JPG	2018-07-19 15:16:35	58.50885833	-135.95216389	210	Abundance	0	0	0	0	Good	LFT	2018-09-25	SO-2017.1	0
SO_C_20180719_A_0484.JPG	2018-07-19 15:16:36	58.50887500	-135.95135556	210	Abundance	0	0	0	0	Good	LFT	2018-09-25	SO-2017.1	0
SO_C_20180719_A_0485.JPG	2018-07-19 15:16:37	58.50889167	-135.95054722	210	Abundance	0	0	0	0	Good	LFT	2018-09-25	SO-2017.1	0
SO_C_20180719_A_0486.JPG	2018-07-19 15:16:38	58.50891111	-135.94973889	210	Abundance	0	0	0	0	Good	LFT	2018-09-25	SO-2017.1	0
SO_C_20180719_A_0487.JPG	2018-07-19 15:16:39	58.50893333	-135.94893056	210	Abundance	0	0	0	0	Good	LFT	2018-09-25	SO-2017.1	0
SO_C_20180719_A_0488.JPG	2018-07-19 15:16:40	58.50895278	-135.94812222	210	Abundance	0	0	0	0	Good	LFT	2018-09-25	SO-2017.1	0
SO_C_20180719_A_0489.JPG	2018-07-19 15:16:41	58.50897222	-135.94731111	210	Abundance	0	0	0	0	Good	LFT	2018-09-25	SO-2017.1	0
SO_C_20180719_A_0490.JPG	2018-07-19 15:16:42	58.50899167	-135.94650000	210	Abundance	0	0	0	0	Good	LFT	2018-09-25	SO-2017.1	0
SO_C_20180719_A_0491.JPG	2018-07-19 15:16:43	58.50901667	-135.94568889	211	Abundance	0	0	0	0	Good	LFT	2018-09-25	SO-2017.1	0
SO_C_20180719_A_0492.JPG	2018-07-19 15:16:44	58.50904167	-135.94487500	211	Abundance	0	0	1	0	Good	LFT	2018-09-25	SO-2017.1	0
SO_C_20180719_A_0493.JPG	2018-07-19 15:16:45	58.50906944	-135.94406389	211	Abundance	0	0	0	0	Good	LFT	2018-09-25	SO-2017.1	0
SO_C_20180719_A_0494.JPG	2018-07-19 15:16:46	58.50909444	-135.94325833	211	Abundance	0	0	0	0	Good	LFT	2018-09-25	SO-2017.1	0
SO_C_20180719_A_0495.JPG	2018-07-19 15:16:47	58.50912222	-135.94245000	211	Abundance	0	0	0	0	Good	LFT	2018-09-25	SO-2017.1	0
SO_C_20180719_A_0496.JPG	2018-07-19 15:16:48	58.50914444	-135.94164167	211	Abundance	0	0	0	0	Good	LFT	2018-09-25	SO-2017.1	0
SO_C_20180719_A_0497.JPG	2018-07-19 15:16:49	58.50916944	-135.94083056	211	Abundance	0	0	0	0	Good	LFT	2018-09-25	SO-2017.1	0
SO_C_20180719_A_0498.JPG	2018-07-19 15:16:50	58.50919167	-135.94002500	211	Abundance	0	0	0	0	Good	LFT	2018-09-25	SO-2017.1	0
SO_C_20180719_A_0499.JPG	2018-07-19 15:16:51	58.50921389	-135.93922222	211	Abundance	0	0	0	0	Good	LFT	2018-09-25	SO-2017.1	0
SO_C_20180719_A_0500.JPG	2018-07-19 15:16:52	58.50923611	-135.93842222	211	Abundance	0	0	0	0	Good	LFT	2018-09-25	SO-2017.1	0
SO_C_20180719_A_0501.JPG	2018-07-19 15:16:53	58.50925556	-135.93761667	211	Abundance	0	0	1	0	Good	LFT	2018-09-25	SO-2017.1	0
SO_C_20180719_A_0502.JPG	2018-07-19 15:16:54	58.50927500	-135.93681667	211	Abundance	0	0	0	0	Good	LFT	2018-09-25	SO-2017.1	0
SO_C_20180719_A_0503.JPG	2018-07-19 15:16:55	58.50929444	-135.93601667	212	Abundance	0	0	0	0	Good	LFT	2018-09-25	SO-2017.1	0
SO_C_20180719_A_0504.JPG	2018-07-19 15:16:56	58.50931111	-135.93521667	212	Abundance	0	0	0	0	Good	LFT	2018-09-25	SO-2017.1	0
SO_C_20180719_A_0505.JPG	2018-07-19 15:16:57	58.50933056	-135.93441667	212	Abundance	0	0	1	0	Good	LFT	2018-09-25	SO-2017.1	0
SO_C_20180719_A_0506.JPG	2018-07-19 15:16:58	58.50934722	-135.93361111	212	Abundance	0	0	1	1	Good	LFT	2018-09-25	SO-2017.1	0
SO_C_20180719_A_0507.JPG	2018-07-19 15:16:59	58.50936389	-135.93280556	212	Abundance	0	0	1	1	Good	LFT	2018-09-25	SO-2017.1	0
SO_C_20180719_A_0508.JPG	2018-07-19 15:17:00	58.50937500	-135.93199722	212	Abundance	0	0	0	1	Good	LFT	2018-09-25	SO-2017.1	0
SO_C_20180719_A_0509.JPG	2018-07-19 15:17:01	58.50938333	-135.93119167	213	Abundance	0	0	0	1	Good	LFT	2018-09-25	SO-2017.1	0
SO_C_20180719_A_0510.JPG	2018-07-19 15:17:02	58.50938889	-135.93038056	213	Abundance	0	0	0	1	Good	LFT	2018-09-25	SO-2017.1	0
SO_C_20180719_A_0511.JPG	2018-07-19 15:17:03	58.50939167	-135.92956944	213	Abundance	0	0	0	1	Good	LFT	2018-09-25	SO-2017.1	0
SO_C_20180719_A_0512.JPG	2018-07-19 15:17:04	58.50938611	-135.92875278	213	Abundance	0	0	0	1	Good	LFT	2018-09-25	SO-2017.1	0
SO_C_20180719_A_0513.JPG	2018-07-19 15:17:05	58.50937222	-135.92793889	213	Abundance	0	0	0	1	Good	LFT	2018-09-25	SO-2017.1	0
SO_C_20180719_A_0514.JPG	2018-07-19 15:17:06	58.50935833	-135.92711944	213	Abundance	0	0	1	1	Good	LFT	2018-09-25	SO-2017.1	0
SO_C_20180719_A_0515.JPG	2018-07-19 15:17:07	58.50933889	-135.92630278	212	Abundance	0	0	1	0	Good	LFT	2018-09-25	SO-2017.1	0
SO_C_20180719_A_0516.JPG	2018-07-19 15:17:08	58.50931667	-135.92547778	212	Abundance	0	0	0	0	Good	LFT	2018-09-25	SO-2017.1	0
SO_C_20180719_A_0517.JPG	2018-07-19 15:17:09	58.50929167	-135.92465278	212	Abundance	0	0	0	0	Good	LFT	2018-09-25	SO-2017.1	0
SO_C_20180719_A_0518.JPG	2018-07-19 15:17:10	58.50927222	-135.92383056	212	Abundance	0	0	0	0	Good	LFT	2018-09-25	SO-2017.1	0
SO_C_20180719_A_0519.JPG	2018-07-19 15:17:11	58.50925278	-135.92300833	212	Abundance	0	0	0	0	Good	LFT	2018-09-25	SO-2017.1	0
SO_C_20180719_A_0520.JPG	2018-07-19 15:17:12	58.50923056	-135.92218333	212	Abundance	0	0	1	0	Good	LFT	2018-09-25	SO-2017.1	0
SO_C_20180719_A_0521.JPG	2018-07-19 15:17:13	58.50921111	-135.92135833	212	Abundance	0	0	0	0	Good	LFT	2018-09-25	SO-2017.1	0
SO_C_20180719_A_0522.JPG	2018-07-19 15:17:14	58.50919444	-135.92053333	212	Abundance	0	0	0	0	Good	LFT	2018-09-25	SO-2017.1	0
SO_C_20180719_A_0523.JPG	2018-07-19 15:17:15	58.50918333	-135.91971111	211	Abundance	0	0	0	0	Good	LFT	2018-09-25	SO-2017.1	0
SO_C_20180719_A_0524.JPG	2018-07-19 15:17:16	58.50917222	-135.91888611	211	Abundance	0	0	0	0	Good	LFT	2018-09-25	SO-2017.1	0
SO_C_20180719_A_0525.JPG	2018-07-19 15:17:17	58.50916389	-135.91806111	211	Abundance	0	0	0	0	Good	LFT	2018-09-25	SO-2017.1	0
SO_C_20180719_A_0526.JPG	2018-07-19 15:17:18	58.50915833	-135.91724167	211	Abundance	0	0	1	0	Good	LFT	2018-09-25	SO-2017.1	0
SO_C_20180719_A_0527.JPG	2018-07-19 15:17:19	58.50915278	-135.91641667	211	Abundance	0	0	1	0	Good	LFT	2018-09-25	SO-2017.1	0
SO_C_20180719_A_0528.JPG	2018-07-19 15:17:20	58.50915278	-135.91559444	211	Abundance	0	0	0	0	Good	LFT	2018-09-25	SO-2017.1	0
SO_C_20180719_A_0529.JPG	2018-07-19 15:17:21	58.50915556	-135.91477500	211	Abundance	0	0	1	0	Good	LFT	2018-09-25	SO-2017.1	0
SO_C_20180719_A_0530.JPG	2018-07-19 15:17:22	58.50916389	-135.91395556	211	Abundance	0	0	0	0	Good	LFT	2018-09-25	SO-2017.1	0
SO_C_20180719_A_0531.JPG	2018-07-19 15:17:23	58.50917778	-135.91313889	211	Abundance	0	0	0	0	Good	LFT	2018-09-25	SO-2017.1	0
SO_C_20180719_A_0532.JPG	2018-07-19 15:17:24	58.50919167	-135.91232500	212	Abundance	0	0	0	0	Good	LFT	2018-09-25	SO-2017.1	0
SO_C_20180719_A_0533.JPG	2018-07-19 15:17:25	58.50921389	-135.91150833	212	Abundance	0	0	0	0	Good	LFT	2018-09-25	SO-2017.1	0
SO_C_20180719_A_0534.JPG	2018-07-19 15:17:26	58.50923889	-135.91069444	212	Abundance	0	0	0	0	Good	LFT	2018-09-25	SO-2017.1	0
SO_C_20180719_A_0535.JPG	2018-07-19 15:17:27	58.50926389	-135.90988333	212	Abundance	0	0	1	0	Good	LFT	2018-09-25	SO-2017.1	0
SO_C_20180719_A_0536.JPG	2018-07-19 15:17:28	58.50928889	-135.90908056	213	Abundance	0	0	0	0	Good	LFT	2018-09-25	SO-2017.1	0
SO_C_20180719_A_0537.JPG	2018-07-19 15:17:29	58.50931944	-135.90828056	213	Abundance	0	0	0	0	Good	LFT	2018-09-25	SO-2017.1	0
SO_C_20180719_A_0538.JPG	2018-07-19 15:17:30	58.50935000	-135.90748333	214	Abundance	0	0	1	0	Good	LFT	2018-09-25	SO-2017.1	0
SO_C_20180719_A_0539.JPG	2018-07-19 15:17:31	58.50938611	-135.90668889	214	Abundance	0	0	1	1	Good	LFT	2018-09-25	SO-2017.1	0
SO_C_20180719_A_0540.JPG	2018-07-19 15:17:32	58.50942222	-135.90589167	215	Abundance	0	0	1	1	Good	LFT	2018-09-25	SO-2017.1	0
SO_C_20180719_A_0541.JPG	2018-07-19 15:17:33	58.50946111	-135.90509722	215	Abundance	0	0	0	1	Good	LFT	2018-09-25	SO-2017.1	0
SO_C_20180719_A_0542.JPG	2018-07-19 15:17:34	58.50950000	-135.90430556	216	Abundance	0	0	0	1	Good	LFT	2018-09-25	SO-2017.1	0
SO_C_20180719_A_0543.JPG	2018-07-19 15:17:35	58.50953889	-135.90350833	216	Abundance	0	0	0	1	Good	LFT	2018-09-25	SO-2017.1	0
SO_C_20180719_A_0544.JPG	2018-07-19 15:17:36	58.50957778	-135.90271389	216	Abundance	0	0	0	1	Good	LFT	2018-09-25	SO-2017.1	0
SO_C_20180719_A_0545.JPG	2018-07-19 15:19:15	58.51294444	-135.90103333	226	Abundance	0	0	0	0	Good	LFT	2018-09-25	SO-2017.1	0
SO_C_20180719_A_0546.JPG	2018-07-19 15:19:16	58.51295833	-135.90181111	226	Abundance	0	0	0	0	Good	LFT	2018-09-25	SO-2017.1	0
SO_C_20180719_A_0547.JPG	2018-07-19 15:19:17	58.51296944	-135.90258611	227	Abundance	0	0	0	0	Good	LFT	2018-09-25	SO-2017.1	0
SO_C_20180719_A_0548.JPG	2018-07-19 15:19:18	58.51298056	-135.90336389	227	Abundance	0	0	0	0	Good	LFT	2018-09-25	SO-2017.1	0
SO_C_20180719_A_0549.JPG	2018-07-19 15:19:19	58.51298889	-135.90414444	227	Abundance	0	0	0	0	Good	LFT	2018-09-25	SO-2017.1	0
SO_C_20180719_A_0550.JPG	2018-07-19 15:19:20	58.51299722	-135.90492500	227	Abundance	0	0	0	0	Good	LFT	2018-09-25	SO-2017.1	0
SO_C_20180719_A_0551.JPG	2018-07-19 15:19:21	58.51300833	-135.90570833	227	Abundance	0	0	0	0	Good	LFT	2018-09-25	SO-2017.1	0
SO_C_20180719_A_0552.JPG	2018-07-19 15:19:22	58.51302222	-135.90650000	227	Abundance	0	0	0	0	Good	LFT	2018-09-25	SO-2017.1	0
SO_C_20180719_A_0553.JPG	2018-07-19 15:19:23	58.51303611	-135.90728889	227	Abundance	0	0	0	0	Good	LFT	2018-09-25	SO-2017.1	0
SO_C_20180719_A_0554.JPG	2018-07-19 15:19:24	58.51304722	-135.90807778	226	Abundance	0	0	0	0	Good	LFT	2018-09-25	SO-2017.1	0
SO_C_20180719_A_0555.JPG	2018-07-19 15:19:25	58.51305556	-135.90886389	226	Abundance	0	0	0	0	Good	LFT	2018-09-25	SO-2017.1	0
SO_C_20180719_A_0556.JPG	2018-07-19 15:19:26	58.51306389	-135.90965278	226	Abundance	0	0	0	0	Good	LFT	2018-09-25	SO-2017.1	0
SO_C_20180719_A_0557.JPG	2018-07-19 15:19:27	58.51307222	-135.91045278	225	Abundance	0	0	0	0	Good	LFT	2018-09-25	SO-2017.1	0
SO_C_20180719_A_0558.JPG	2018-07-19 15:19:28	58.51307778	-135.91125000	225	Abundance	0	0	0	0	Good	LFT	2018-09-25	SO-2017.1	0
SO_C_20180719_A_0559.JPG	2018-07-19 15:19:29	58.51307500	-135.91204444	225	Abundance	0	0	1	0	Good	LFT	2018-09-25	SO-2017.1	0
SO_C_20180719_A_0560.JPG	2018-07-19 15:19:30	58.51306667	-135.91283889	224	Abundance	0	0	0	0	Good	LFT	2018-09-25	SO-2017.1	0
SO_C_20180719_A_0561.JPG	2018-07-19 15:19:31	58.51305556	-135.91363056	224	Abundance	0	0	0	0	Good	LFT	2018-09-25	SO-2017.1	0
SO_C_20180719_A_0562.JPG	2018-07-19 15:19:32	58.51304444	-135.91442500	224	Abundance	0	0	0	0	Good	LFT	2018-09-25	SO-2017.1	0
SO_C_20180719_A_0563.JPG	2018-07-19 15:19:33	58.51303056	-135.91521944	223	Abundance	0	0	0	0	Good	LFT	2018-09-25	SO-2017.1	0
SO_C_20180719_A_0564.JPG	2018-07-19 15:19:34	58.51301667	-135.91601389	223	Abundance	0	0	0	0	Good	LFT	2018-09-25	SO-2017.1	0
SO_C_20180719_A_0565.JPG	2018-07-19 15:19:35	58.51300278	-135.91681111	223	Abundance	0	0	0	0	Good	LFT	2018-09-25	SO-2017.1	0
SO_C_20180719_A_0566.JPG	2018-07-19 15:19:36	58.51299167	-135.91760278	222	Abundance	0	0	0	0	Good	LFT	2018-09-25	SO-2017.1	0
SO_C_20180719_A_0567.JPG	2018-07-19 15:19:37	58.51298333	-135.91839444	222	Abundance	0	0	0	0	Good	LFT	2018-09-25	SO-2017.1	0
SO_C_20180719_A_0568.JPG	2018-07-19 15:19:38	58.51297778	-135.91918333	222	Abundance	0	0	0	0	Good	LFT	2018-09-25	SO-2017.1	0
SO_C_20180719_A_0569.JPG	2018-07-19 15:19:39	58.51297500	-135.91997500	222	Abundance	0	0	0	0	Good	LFT	2018-09-25	SO-2017.1	0
SO_C_20180719_A_0570.JPG	2018-07-19 15:19:40	58.51297222	-135.92076389	221	Abundance	0	0	0	0	Good	LFT	2018-09-25	SO-2017.1	0
SO_C_20180719_A_0571.JPG	2018-07-19 15:19:41	58.51296944	-135.92155278	221	Abundance	0	0	0	0	Good	LFT	2018-09-25	SO-2017.1	0
SO_C_20180719_A_0572.JPG	2018-07-19 15:19:42	58.51296944	-135.92233889	221	Abundance	0	0	0	0	Good	LFT	2018-09-25	SO-2017.1	0
SO_C_20180719_A_0573.JPG	2018-07-19 15:19:43	58.51296667	-135.92313333	221	Abundance	0	0	1	0	Good	LFT	2018-09-25	SO-2017.1	0
SO_C_20180719_A_0574.JPG	2018-07-19 15:19:44	58.51296667	-135.92392500	221	Abundance	0	0	0	0	Good	LFT	2018-09-25	SO-2017.1	0
SO_C_20180719_A_0575.JPG	2018-07-19 15:19:45	58.51296667	-135.92472222	221	Abundance	0	0	0	0	Good	LFT	2018-09-25	SO-2017.1	0
SO_C_20180719_A_0576.JPG	2018-07-19 15:19:46	58.51296389	-135.92551389	221	Abundance	0	0	0	0	Good	LFT	2018-09-25	SO-2017.1	0
SO_C_20180719_A_0577.JPG	2018-07-19 15:19:47	58.51296111	-135.92630556	220	Abundance	0	0	0	0	Good	LFT	2018-09-25	SO-2017.1	0
SO_C_20180719_A_0578.JPG	2018-07-19 15:19:48	58.51295833	-135.92709722	220	Abundance	0	0	1	0	Good	LFT	2018-09-25	SO-2017.1	0
SO_C_20180719_A_0579.JPG	2018-07-19 15:19:49	58.51295833	-135.92789167	220	Abundance	0	0	1	0	Good	LFT	2018-09-25	SO-2017.1	0
SO_C_20180719_A_0580.JPG	2018-07-19 15:19:50	58.51295556	-135.92868333	219	Abundance	0	0	1	0	Good	LFT	2018-09-25	SO-2017.1	0
SO_C_20180719_A_0581.JPG	2018-07-19 15:19:51	58.51295556	-135.92947778	219	Abundance	0	0	1	0	Good	LFT	2018-09-25	SO-2017.1	0
SO_C_20180719_A_0582.JPG	2018-07-19 15:19:52	58.51295278	-135.93026944	219	Abundance	0	0	1	0	Good	LFT	2018-09-25	SO-2017.1	0
SO_C_20180719_A_0583.JPG	2018-07-19 15:19:53	58.51295000	-135.93105833	218	Abundance	0	0	1	0	Good	LFT	2018-09-25	SO-2017.1	0
SO_C_20180719_A_0584.JPG	2018-07-19 15:19:54	58.51295000	-135.93185000	218	Abundance	0	0	1	0	Good	LFT	2018-09-25	SO-2017.1	0
SO_C_20180719_A_0585.JPG	2018-07-19 15:19:55	58.51294722	-135.93263889	218	Abundance	0	0	1	0	Good	LFT	2018-09-25	SO-2017.1	0
SO_C_20180719_A_0586.JPG	2018-07-19 15:19:56	58.51294167	-135.93342778	218	Abundance	0	0	0	0	Good	LFT	2018-09-25	SO-2017.1	0
SO_C_20180719_A_0587.JPG	2018-07-19 15:19:57	58.51293611	-135.93421944	218	Abundance	0	0	1	0	Good	LFT	2018-09-25	SO-2017.1	0
SO_C_20180719_A_0588.JPG	2018-07-19 15:19:58	58.51293056	-135.93501111	219	Abundance	0	0	1	0	Good	LFT	2018-09-25	SO-2017.1	0
SO_C_20180719_A_0589.JPG	2018-07-19 15:19:59	58.51292778	-135.93580000	219	Abundance	0	0	1	0	Good	LFT	2018-09-25	SO-2017.1	0
SO_C_20180719_A_0590.JPG	2018-07-19 15:20:00	58.51292222	-135.93658333	219	Abundance	0	0	1	0	Good	LFT	2018-09-25	SO-2017.1	0
SO_C_20180719_A_0591.JPG	2018-07-19 15:20:01	58.51291389	-135.93736667	220	Abundance	0	0	1	0	Good	LFT	2018-09-25	SO-2017.1	0
SO_C_20180719_A_0592.JPG	2018-07-19 15:20:02	58.51291111	-135.93814444	220	Abundance	0	0	1	0	Good	LFT	2018-09-25	SO-2017.1	0
SO_C_20180719_A_0593.JPG	2018-07-19 15:20:03	58.51290556	-135.93892222	221	Abundance	0	0	1	0	Good	LFT	2018-09-25	SO-2017.1	0
SO_C_20180719_A_0594.JPG	2018-07-19 15:20:04	58.51289444	-135.93970278	221	Abundance	0	0	1	0	Good	LFT	2018-09-25	SO-2017.1	0
SO_C_20180719_A_0595.JPG	2018-07-19 15:20:05	58.51288611	-135.94048333	222	Abundance	0	0	1	0	Good	LFT	2018-09-25	SO-2017.1	0
SO_C_20180719_A_0596.JPG	2018-07-19 15:20:06	58.51287778	-135.94126667	222	Abundance	0	0	1	0	Good	LFT	2018-09-25	SO-2017.1	0
SO_C_20180719_A_0597.JPG	2018-07-19 15:20:07	58.51286944	-135.94205000	222	Abundance	0	0	0	0	Good	LFT	2018-09-25	SO-2017.1	0
SO_C_20180719_A_0598.JPG	2018-07-19 15:20:08	58.51286389	-135.94283611	223	Abundance	0	0	0	0	Good	LFT	2018-09-25	SO-2017.1	0
SO_C_20180719_A_0599.JPG	2018-07-19 15:20:09	58.51285833	-135.94362222	223	Abundance	1	0	0	0	Good	LFT	2018-09-25	SO-2017.1	0
SO_C_20180719_A_0600.JPG	2018-07-19 15:20:10	58.51284722	-135.94441111	223	Abundance	0	0	0	0	Good	LFT	2018-09-25	SO-2017.1	0
SO_C_20180719_A_0601.JPG	2018-07-19 15:20:11	58.51283611	-135.94519722	223	Abundance	0	0	1	0	Good	LFT	2018-09-25	SO-2017.1	0
SO_C_20180719_A_0602.JPG	2018-07-19 15:20:12	58.51282222	-135.94598889	223	Abundance	0	0	0	0	Good	LFT	2018-09-25	SO-2017.1	0
SO_C_20180719_A_0603.JPG	2018-07-19 15:20:13	58.51280833	-135.94678333	222	Abundance	0	0	0	0	Good	LFT	2018-09-25	SO-2017.1	0
SO_C_20180719_A_0604.JPG	2018-07-19 15:20:14	58.51278889	-135.94758056	222	Abundance	0	0	0	0	Good	LFT	2018-09-25	SO-2017.1	0
SO_C_20180719_A_0605.JPG	2018-07-19 15:20:15	58.51276944	-135.94838056	222	Abundance	0	0	0	0	Good	LFT	2018-09-25	SO-2017.1	0
SO_C_20180719_A_0606.JPG	2018-07-19 15:20:16	58.51275000	-135.94918889	221	Abundance	0	0	0	0	Good	LFT	2018-09-25	SO-2017.1	0
SO_C_20180719_A_0607.JPG	2018-07-19 15:20:17	58.51272778	-135.94999167	221	Abundance	0	0	1	0	Good	LFT	2018-09-25	SO-2017.1	0
SO_C_20180719_A_0608.JPG	2018-07-19 15:20:18	58.51270556	-135.95079167	220	Abundance	0	0	1	0	Good	LFT	2018-09-25	SO-2017.1	0
SO_C_20180719_A_0609.JPG	2018-07-19 15:20:19	58.51268056	-135.95159722	219	Abundance	0	0	1	0	Good	LFT	2018-09-25	SO-2017.1	0
SO_C_20180719_A_0610.JPG	2018-07-19 15:20:20	58.51265556	-135.95240000	219	Abundance	0	0	1	0	Good	LFT	2018-09-25	SO-2017.1	0
SO_C_20180719_A_0611.JPG	2018-07-19 15:20:21	58.51263333	-135.95320278	218	Abundance	0	0	1	0	Good	LFT	2018-09-25	SO-2017.1	0
SO_C_20180719_A_0612.JPG	2018-07-19 15:20:22	58.51261667	-135.95400278	218	Abundance	0	0	0	0	Good	LFT	2018-09-25	SO-2017.1	0
SO_C_20180719_A_0613.JPG	2018-07-19 15:20:23	58.51259444	-135.95479722	217	Abundance	0	0	0	0	Good	LFT	2018-09-25	SO-2017.1	0
SO_C_20180719_A_0614.JPG	2018-07-19 15:20:24	58.51257500	-135.95559167	216	Abundance	0	0	0	0	Good	LFT	2018-09-25	SO-2017.1	0
SO_C_20180719_A_0615.JPG	2018-07-19 15:20:25	58.51255556	-135.95638056	216	Abundance	0	0	0	0	Good	LFT	2018-09-25	SO-2017.1	0
SO_C_20180719_A_0616.JPG	2018-07-19 15:20:26	58.51253611	-135.95716389	216	Abundance	0	0	1	0	Good	LFT	2018-09-25	SO-2017.1	0
SO_C_20180719_A_0617.JPG	2018-07-19 15:20:27	58.51251944	-135.95794444	216	Abundance	0	0	1	0	Good	LFT	2018-09-25	SO-2017.1	0
SO_C_20180719_A_0618.JPG	2018-07-19 15:20:28	58.51250556	-135.95872778	217	Abundance	0	0	0	0	Good	LFT	2018-09-25	SO-2017.1	0
SO_C_20180719_A_0619.JPG	2018-07-19 15:20:29	58.51250000	-135.95951389	217	Abundance	0	0	0	0	Good	LFT	2018-09-25	SO-2017.1	0
SO_C_20180719_A_0620.JPG	2018-07-19 15:20:30	58.51249722	-135.96030000	218	Abundance	0	0	0	0	Good	LFT	2018-09-25	SO-2017.1	0
SO_C_20180719_A_0621.JPG	2018-07-19 15:20:31	58.51250000	-135.96109167	219	Abundance	0	0	1	0	Good	LFT	2018-09-25	SO-2017.1	0
SO_C_20180719_A_0622.JPG	2018-07-19 15:20:32	58.51250833	-135.96188056	219	Abundance	0	0	1	0	Good	LFT	2018-09-25	SO-2017.1	0
SO_C_20180719_A_0623.JPG	2018-07-19 15:20:33	58.51251944	-135.96267222	219	Abundance	0	0	0	0	Good	LFT	2018-09-25	SO-2017.1	0
SO_C_20180719_A_0624.JPG	2018-07-19 15:20:34	58.51252778	-135.96346111	219	Abundance	0	0	0	0	Good	LFT	2018-09-25	SO-2017.1	0
SO_C_20180719_A_0625.JPG	2018-07-19 15:20:35	58.51253611	-135.96425000	219	Abundance	0	0	0	0	Good	LFT	2018-09-25	SO-2017.1	0
SO_C_20180719_A_0626.JPG	2018-07-19 15:20:36	58.51254722	-135.96504444	219	Abundance	0	0	0	0	Good	LFT	2018-09-25	SO-2017.1	0
SO_C_20180719_A_0627.JPG	2018-07-19 15:20:37	58.51255833	-135.96583611	219	Abundance	0	0	0	0	Good	LFT	2018-09-25	SO-2017.1	0
SO_C_20180719_A_0628.JPG	2018-07-19 15:20:38	58.51256944	-135.96663056	218	Abundance	0	0	0	0	Good	LFT	2018-09-25	SO-2017.1	0
SO_C_20180719_A_0629.JPG	2018-07-19 15:20:39	58.51257778	-135.96742500	218	Abundance	0	0	0	0	Good	LFT	2018-09-25	SO-2017.1	0
SO_C_20180719_A_0630.JPG	2018-07-19 15:20:40	58.51258611	-135.96821944	218	Abundance	0	0	0	0	Good	LFT	2018-09-25	SO-2017.1	0
SO_C_20180719_A_0631.JPG	2018-07-19 15:20:41	58.51258889	-135.96901111	218	Abundance	0	0	1	0	Good	LFT	2018-09-25	SO-2017.1	0
SO_C_20180719_A_0632.JPG	2018-07-19 15:20:42	58.51259167	-135.96980278	218	Abundance	0	0	1	0	Good	LFT	2018-09-25	SO-2017.1	0
SO_C_20180719_A_0633.JPG	2018-07-19 15:20:43	58.51258889	-135.97059722	218	Abundance	0	0	1	0	Good	LFT	2018-09-25	SO-2017.1	0
SO_C_20180719_A_0634.JPG	2018-07-19 15:20:44	58.51258333	-135.97138889	218	Abundance	0	0	0	0	Good	LFT	2018-09-25	SO-2017.1	0
SO_C_20180719_A_0635.JPG	2018-07-19 15:20:45	58.51257778	-135.97218333	219	Abundance	0	0	0	0	Good	LFT	2018-09-25	SO-2017.1	0
SO_C_20180719_A_0636.JPG	2018-07-19 15:20:46	58.51257222	-135.97297778	219	Abundance	0	0	0	0	Good	LFT	2018-09-25	SO-2017.1	0
SO_C_20180719_A_0637.JPG	2018-07-19 15:20:47	58.51256389	-135.97377500	219	Abundance	0	0	0	0	Good	LFT	2018-09-25	SO-2017.1	0
SO_C_20180719_A_0638.JPG	2018-07-19 15:20:48	58.51255000	-135.97458056	219	Abundance	2	0	0	0	Good	LFT	2018-09-25	SO-2017.1	0
SO_C_20180719_A_0639.JPG	2018-07-19 15:20:49	58.51253889	-135.97538056	219	Abundance	0	0	0	0	Good	LFT	2018-09-25	SO-2017.1	0
SO_C_20180719_A_0640.JPG	2018-07-19 15:20:50	58.51252500	-135.97618056	219	Abundance	0	0	0	0	Good	LFT	2018-09-25	SO-2017.1	0
SO_C_20180719_A_0641.JPG	2018-07-19 15:20:51	58.51250556	-135.97698333	219	Abundance	0	0	0	0	Good	LFT	2018-09-25	SO-2017.1	0
SO_C_20180719_A_0642.JPG	2018-07-19 15:20:52	58.51248889	-135.97778611	219	Abundance	0	0	0	0	Good	LFT	2018-09-25	SO-2017.1	0
SO_C_20180719_A_0643.JPG	2018-07-19 15:20:53	58.51246944	-135.97858611	218	Abundance	0	0	0	0	Good	LFT	2018-09-25	SO-2017.1	0
SO_C_20180719_A_0644.JPG	2018-07-19 15:20:54	58.51244722	-135.97939167	218	Abundance	0	0	0	0	Good	LFT	2018-09-25	SO-2017.1	0
SO_C_20180719_A_0645.JPG	2018-07-19 15:20:55	58.51242778	-135.98019444	218	Abundance	0	0	0	0	Good	LFT	2018-09-25	SO-2017.1	0
SO_C_20180719_A_0646.JPG	2018-07-19 15:20:56	58.51241389	-135.98099444	217	Abundance	0	0	0	0	Good	LFT	2018-09-25	SO-2017.1	0
SO_C_20180719_A_0647.JPG	2018-07-19 15:20:57	58.51240556	-135.98179722	217	Abundance	0	0	0	0	Good	LFT	2018-09-25	SO-2017.1	0
SO_C_20180719_A_0648.JPG	2018-07-19 15:20:58	58.51240000	-135.98260000	216	Abundance	0	0	0	0	Good	LFT	2018-09-25	SO-2017.1	0
SO_C_20180719_A_0649.JPG	2018-07-19 15:20:59	58.51240000	-135.98340000	216	Abundance	0	0	0	0	Good	LFT	2018-09-25	SO-2017.1	0
SO_C_20180719_A_0650.JPG	2018-07-19 15:21:00	58.51240556	-135.98419722	215	Abundance	0	0	0	0	Good	LFT	2018-09-25	SO-2017.1	0
SO_C_20180719_A_0651.JPG	2018-07-19 15:21:01	58.51241111	-135.98499167	215	Abundance	0	0	0	0	Good	LFT	2018-09-25	SO-2017.1	0
SO_C_20180719_A_0652.JPG	2018-07-19 15:21:02	58.51241944	-135.98578056	215	Abundance	0	0	0	0	Good	LFT	2018-09-25	SO-2017.1	0
SO_C_20180719_A_0653.JPG	2018-07-19 15:21:03	58.51242778	-135.98656944	215	Abundance	0	0	0	0	Good	LFT	2018-09-25	SO-2017.1	0
SO_C_20180719_A_0654.JPG	2018-07-19 15:21:04	58.51243333	-135.98735556	215	Abundance	0	0	0	0	Good	LFT	2018-09-25	SO-2017.1	0
SO_C_20180719_A_0655.JPG	2018-07-19 15:21:05	58.51244167	-135.98814167	216	Abundance	0	0	0	0	Good	LFT	2018-09-25	SO-2017.1	0
SO_C_20180719_A_0656.JPG	2018-07-19 15:21:06	58.51244722	-135.98892500	216	Abundance	0	0	0	0	Good	LFT	2018-09-25	SO-2017.1	0
SO_C_20180719_A_0657.JPG	2018-07-19 15:21:07	58.51245000	-135.98970833	216	Abundance	0	0	0	0	Good	LFT	2018-09-25	SO-2017.1	0
SO_C_20180719_A_0658.JPG	2018-07-19 15:21:08	58.51245278	-135.99049167	217	Abundance	0	0	0	0	Good	LFT	2018-09-25	SO-2017.1	0
SO_C_20180719_A_0659.JPG	2018-07-19 15:21:09	58.51245278	-135.99127500	217	Abundance	0	0	0	0	Good	LFT	2018-09-25	SO-2017.1	0
SO_C_20180719_A_0660.JPG	2018-07-19 15:21:10	58.51245278	-135.99206111	217	Abundance	0	0	0	0	Good	LFT	2018-09-25	SO-2017.1	0
SO_C_20180719_A_0661.JPG	2018-07-19 15:21:11	58.51245278	-135.99284722	218	Abundance	0	0	0	0	Good	LFT	2018-09-25	SO-2017.1	0
SO_C_20180719_A_0662.JPG	2018-07-19 15:21:12	58.51245000	-135.99363889	218	Abundance	0	0	0	0	Good	LFT	2018-09-25	SO-2017.1	0
SO_C_20180719_A_0663.JPG	2018-07-19 15:21:13	58.51244444	-135.99443056	218	Abundance	0	0	0	0	Good	LFT	2018-09-25	SO-2017.1	0
SO_C_20180719_A_0664.JPG	2018-07-19 15:21:14	58.51243611	-135.99522500	218	Abundance	0	0	1	0	Good	LFT	2018-09-25	SO-2017.1	0
SO_C_20180719_A_0665.JPG	2018-07-19 15:21:15	58.51242778	-135.99601944	218	Abundance	0	0	1	1	Good	LFT	2018-09-25	SO-2017.1	0
SO_C_20180719_A_0666.JPG	2018-07-19 15:21:16	58.51241389	-135.99681111	218	Abundance	0	0	0	1	Good	LFT	2018-09-25	SO-2017.1	0
SO_C_20180719_A_0667.JPG	2018-07-19 15:21:17	58.51240000	-135.99760833	219	Abundance	0	0	0	1	Good	LFT	2018-09-25	SO-2017.1	0
SO_C_20180719_A_0668.JPG	2018-07-19 15:23:32	58.51599722	-135.99495278	220	Abundance	0	0	1	1	Good	LFT	2018-09-25	SO-2017.1	0
SO_C_20180719_A_0669.JPG	2018-07-19 15:23:33	58.51601667	-135.99414444	220	Abundance	0	0	1	1	Good	LFT	2018-09-25	SO-2017.1	0
SO_C_20180719_A_0670.JPG	2018-07-19 15:23:34	58.51603611	-135.99333611	220	Abundance	0	0	1	0	Good	LFT	2018-09-25	SO-2017.1	0
SO_C_20180719_A_0671.JPG	2018-07-19 15:23:35	58.51605556	-135.99253056	219	Abundance	0	0	0	0	Good	LFT	2018-09-25	SO-2017.1	0
SO_C_20180719_A_0672.JPG	2018-07-19 15:23:36	58.51606944	-135.99171944	219	Abundance	0	0	0	0	Good	LFT	2018-09-25	SO-2017.1	0
SO_C_20180719_A_0673.JPG	2018-07-19 15:23:37	58.51608056	-135.99090556	219	Abundance	0	0	0	0	Good	LFT	2018-09-25	SO-2017.1	0
SO_C_20180719_A_0674.JPG	2018-07-19 15:23:38	58.51609167	-135.99009444	218	Abundance	0	0	0	0	Good	LFT	2018-09-25	SO-2017.1	0
SO_C_20180719_A_0675.JPG	2018-07-19 15:23:39	58.51610556	-135.98928056	218	Abundance	0	0	0	0	Good	LFT	2018-09-25	SO-2017.1	0
SO_C_20180719_A_0676.JPG	2018-07-19 15:23:40	58.51611944	-135.98846389	218	Abundance	0	0	0	0	Good	LFT	2018-09-25	SO-2017.1	0
SO_C_20180719_A_0677.JPG	2018-07-19 15:23:41	58.51613611	-135.98764722	217	Abundance	0	0	0	0	Good	LFT	2018-09-25	SO-2017.1	0
SO_C_20180719_A_0678.JPG	2018-07-19 15:23:42	58.51615000	-135.98682778	217	Abundance	0	0	0	0	Good	LFT	2018-09-25	SO-2017.1	0
SO_C_20180719_A_0679.JPG	2018-07-19 15:23:43	58.51616111	-135.98600278	217	Abundance	0	0	0	0	Good	LFT	2018-09-25	SO-2017.1	0
SO_C_20180719_A_0680.JPG	2018-07-19 15:23:44	58.51616667	-135.98517500	216	Abundance	0	0	0	0	Good	LFT	2018-09-25	SO-2017.1	0
SO_C_20180719_A_0681.JPG	2018-07-19 15:23:45	58.51617500	-135.98435000	215	Abundance	0	0	0	0	Good	LFT	2018-09-25	SO-2017.1	0
SO_C_20180719_A_0682.JPG	2018-07-19 15:23:46	58.51617500	-135.98352500	215	Abundance	0	0	0	0	Good	LFT	2018-09-25	SO-2017.1	0
SO_C_20180719_A_0683.JPG	2018-07-19 15:23:47	58.51617222	-135.98269722	214	Abundance	0	0	0	0	Good	LFT	2018-09-25	SO-2017.1	0
SO_C_20180719_A_0684.JPG	2018-07-19 15:23:48	58.51616667	-135.98187500	214	Abundance	0	0	0	0	Good	LFT	2018-09-25	SO-2017.1	0
SO_C_20180719_A_0685.JPG	2018-07-19 15:23:49	58.51616111	-135.98105000	214	Abundance	0	0	0	0	Good	LFT	2018-09-25	SO-2017.1	0
SO_C_20180719_A_0686.JPG	2018-07-19 15:23:50	58.51615278	-135.98022500	213	Abundance	0	0	0	0	Good	LFT	2018-09-25	SO-2017.1	0
SO_C_20180719_A_0687.JPG	2018-07-19 15:23:51	58.51614722	-135.97940278	213	Abundance	0	0	0	0	Good	LFT	2018-09-25	SO-2017.1	0
SO_C_20180719_A_0688.JPG	2018-07-19 15:23:52	58.51613889	-135.97858333	213	Abundance	0	0	1	0	Good	LFT	2018-09-25	SO-2017.1	0
SO_C_20180719_A_0689.JPG	2018-07-19 15:23:53	58.51613056	-135.97776389	213	Abundance	0	0	0	0	Good	LFT	2018-09-25	SO-2017.1	0
SO_C_20180719_A_0690.JPG	2018-07-19 15:23:54	58.51612222	-135.97694167	213	Abundance	0	0	1	0	Good	LFT	2018-09-25	SO-2017.1	0
SO_C_20180719_A_0691.JPG	2018-07-19 15:23:55	58.51611111	-135.97612778	213	Abundance	0	0	0	0	Good	LFT	2018-09-25	SO-2017.1	0
SO_C_20180719_A_0692.JPG	2018-07-19 15:23:56	58.51610278	-135.97531667	213	Abundance	1	0	0	0	Good	LFT	2018-09-25	SO-2017.1	0
SO_C_20180719_A_0693.JPG	2018-07-19 15:23:57	58.51609444	-135.97450278	214	Abundance	0	0	0	0	Good	LFT	2018-09-25	SO-2017.1	0
SO_C_20180719_A_0694.JPG	2018-07-19 15:23:58	58.51608889	-135.97369167	214	Abundance	0	0	0	0	Good	LFT	2018-09-25	SO-2017.1	0
SO_C_20180719_A_0695.JPG	2018-07-19 15:23:59	58.51608611	-135.97288056	214	Abundance	0	0	0	0	Good	LFT	2018-09-25	SO-2017.1	0
SO_C_20180719_A_0696.JPG	2018-07-19 15:24:00	58.51608333	-135.97206667	214	Abundance	0	0	0	0	Good	LFT	2018-09-25	SO-2017.1	0
SO_C_20180719_A_0697.JPG	2018-07-19 15:24:01	58.51608333	-135.97125556	214	Abundance	0	0	0	0	Good	LFT	2018-09-25	SO-2017.1	0
SO_C_20180719_A_0698.JPG	2018-07-19 15:24:02	58.51608333	-135.97044444	214	Abundance	0	0	1	0	Good	LFT	2018-09-25	SO-2017.1	0
SO_C_20180719_A_0699.JPG	2018-07-19 15:24:03	58.51608611	-135.96963333	214	Abundance	0	0	0	0	Good	LFT	2018-09-25	SO-2017.1	0
SO_C_20180719_A_0700.JPG	2018-07-19 15:24:04	58.51609167	-135.96882500	214	Abundance	0	0	0	0	Good	LFT	2018-09-25	SO-2017.1	0
SO_C_20180719_A_0701.JPG	2018-07-19 15:24:05	58.51609722	-135.96801667	214	Abundance	0	0	0	0	Good	LFT	2018-09-25	SO-2017.1	0
SO_C_20180719_A_0702.JPG	2018-07-19 15:24:06	58.51610556	-135.96720556	214	Abundance	0	0	0	0	Good	LFT	2018-09-26	SO-2017.1	0
SO_C_20180719_A_0703.JPG	2018-07-19 15:24:07	58.51611944	-135.96639722	214	Abundance	0	0	0	0	Good	LFT	2018-09-26	SO-2017.1	0
SO_C_20180719_A_0704.JPG	2018-07-19 15:24:08	58.51613333	-135.96558333	214	Abundance	0	0	0	0	Good	LFT	2018-09-26	SO-2017.1	0
SO_C_20180719_A_0705.JPG	2018-07-19 15:24:09	58.51614722	-135.96477222	214	Abundance	0	0	0	0	Good	LFT	2018-09-26	SO-2017.1	0
SO_C_20180719_A_0706.JPG	2018-07-19 15:24:10	58.51616389	-135.96395833	214	Abundance	0	0	1	0	Good	LFT	2018-09-26	SO-2017.1	0
SO_C_20180719_A_0707.JPG	2018-07-19 15:24:11	58.51617778	-135.96314167	214	Abundance	0	0	1	0	Good	LFT	2018-09-26	SO-2017.1	0
SO_C_20180719_A_0708.JPG	2018-07-19 15:24:12	58.51619444	-135.96232500	214	Abundance	0	0	1	0	Good	LFT	2018-09-26	SO-2017.1	0
SO_C_20180719_A_0709.JPG	2018-07-19 15:24:13	58.51621111	-135.96150833	213	Abundance	0	0	0	0	Good	LFT	2018-09-26	SO-2017.1	0
SO_C_20180719_A_0710.JPG	2018-07-19 15:24:14	58.51622778	-135.96069444	213	Abundance	0	0	0	0	Good	LFT	2018-09-26	SO-2017.1	0
SO_C_20180719_A_0711.JPG	2018-07-19 15:24:15	58.51624722	-135.95988056	213	Abundance	0	0	0	0	Good	LFT	2018-09-26	SO-2017.1	0
SO_C_20180719_A_0712.JPG	2018-07-19 15:24:16	58.51626667	-135.95906944	213	Abundance	0	0	0	0	Good	LFT	2018-09-26	SO-2017.1	0
SO_C_20180719_A_0713.JPG	2018-07-19 15:24:17	58.51628889	-135.95825556	213	Abundance	0	0	1	0	Good	LFT	2018-09-26	SO-2017.1	0
SO_C_20180719_A_0714.JPG	2018-07-19 15:24:18	58.51630833	-135.95744444	213	Abundance	0	0	1	0	Good	LFT	2018-09-26	SO-2017.1	0
SO_C_20180719_A_0715.JPG	2018-07-19 15:24:19	58.51632778	-135.95663611	213	Abundance	0	0	1	0	Good	LFT	2018-09-26	SO-2017.1	0
SO_C_20180719_A_0716.JPG	2018-07-19 15:24:20	58.51634444	-135.95583056	213	Abundance	0	0	1	0	Good	LFT	2018-09-26	SO-2017.1	0
SO_C_20180719_A_0717.JPG	2018-07-19 15:24:21	58.51635833	-135.95502222	214	Abundance	0	0	1	0	Good	LFT	2018-09-26	SO-2017.1	0
SO_C_20180719_A_0718.JPG	2018-07-19 15:24:22	58.51636944	-135.95421944	214	Abundance	0	0	1	0	Good	LFT	2018-09-26	SO-2017.1	0
SO_C_20180719_A_0719.JPG	2018-07-19 15:24:23	58.51638056	-135.95341944	214	Abundance	0	0	1	0	Good	LFT	2018-09-26	SO-2017.1	0
SO_C_20180719_A_0720.JPG	2018-07-19 15:24:24	58.51639167	-135.95262222	214	Abundance	0	0	1	0	Good	LFT	2018-09-26	SO-2017.1	0
SO_C_20180719_A_0721.JPG	2018-07-19 15:24:25	58.51640000	-135.95182500	215	Abundance	0	0	1	0	Good	LFT	2018-09-26	SO-2017.1	0
SO_C_20180719_A_0722.JPG	2018-07-19 15:24:26	58.51640833	-135.95102778	215	Abundance	0	0	1	0	Good	LFT	2018-09-26	SO-2017.1	0
SO_C_20180719_A_0723.JPG	2018-07-19 15:24:27	58.51641111	-135.95022500	216	Abundance	1	0	1	0	Good	LFT	2018-09-26	SO-2017.1	0
SO_C_20180719_A_0724.JPG	2018-07-19 15:24:28	58.51641111	-135.94942778	217	Abundance	1	0	1	0	Good	LFT	2018-09-26	SO-2017.1	0
SO_C_20180719_A_0725.JPG	2018-07-19 15:24:29	58.51640556	-135.94862778	217	Abundance	0	0	0	0	Good	LFT	2018-09-26	SO-2017.1	0
SO_C_20180719_A_0726.JPG	2018-07-19 15:24:30	58.51639722	-135.94783056	218	Abundance	0	0	1	0	Good	LFT	2018-09-26	SO-2017.1	0
SO_C_20180719_A_0727.JPG	2018-07-19 15:24:31	58.51638611	-135.94703333	219	Abundance	0	0	0	0	Good	LFT	2018-09-26	SO-2017.1	0
SO_C_20180719_A_0728.JPG	2018-07-19 15:24:32	58.51637500	-135.94623333	219	Abundance	0	0	0	0	Good	LFT	2018-09-26	SO-2017.1	0
SO_C_20180719_A_0729.JPG	2018-07-19 15:24:33	58.51636667	-135.94543611	220	Abundance	0	0	1	0	Good	LFT	2018-09-26	SO-2017.1	0
SO_C_20180719_A_0730.JPG	2018-07-19 15:24:34	58.51635833	-135.94463611	220	Abundance	0	0	0	0	Good	LFT	2018-09-26	SO-2017.1	0
SO_C_20180719_A_0731.JPG	2018-07-19 15:24:35	58.51635000	-135.94383889	220	Abundance	0	0	0	0	Good	LFT	2018-09-26	SO-2017.1	0
SO_C_20180719_A_0732.JPG	2018-07-19 15:24:36	58.51634167	-135.94304167	221	Abundance	0	0	1	0	Good	LFT	2018-09-26	SO-2017.1	0
SO_C_20180719_A_0733.JPG	2018-07-19 15:24:37	58.51633333	-135.94224444	221	Abundance	0	0	1	0	Good	LFT	2018-09-26	SO-2017.1	0
SO_C_20180719_A_0734.JPG	2018-07-19 15:24:38	58.51632778	-135.94144444	222	Abundance	0	0	1	0	Good	LFT	2018-09-26	SO-2017.1	0
SO_C_20180719_A_0735.JPG	2018-07-19 15:24:39	58.51632222	-135.94064722	222	Abundance	0	0	1	0	Good	LFT	2018-09-26	SO-2017.1	0
SO_C_20180719_A_0736.JPG	2018-07-19 15:24:40	58.51631389	-135.93984444	222	Abundance	0	0	1	0	Good	LFT	2018-09-26	SO-2017.1	0
SO_C_20180719_A_0737.JPG	2018-07-19 15:24:41	58.51630833	-135.93904167	223	Abundance	0	0	1	0	Good	LFT	2018-09-26	SO-2017.1	0
SO_C_20180719_A_0738.JPG	2018-07-19 15:24:42	58.51630556	-135.93823611	223	Abundance	0	0	1	0	Good	LFT	2018-09-26	SO-2017.1	0
SO_C_20180719_A_0739.JPG	2018-07-19 15:24:43	58.51630833	-135.93742778	224	Abundance	0	0	1	0	Good	LFT	2018-09-26	SO-2017.1	0
SO_C_20180719_A_0740.JPG	2018-07-19 15:24:44	58.51631111	-135.93661667	224	Abundance	0	0	1	0	Good	LFT	2018-09-26	SO-2017.1	0
SO_C_20180719_A_0741.JPG	2018-07-19 15:24:45	58.51631944	-135.93580556	224	Abundance	0	0	1	0	Good	LFT	2018-09-26	SO-2017.1	0
SO_C_20180719_A_0742.JPG	2018-07-19 15:24:46	58.51632500	-135.93499167	224	Abundance	0	0	1	0	Good	LFT	2018-09-26	SO-2017.1	0
SO_C_20180719_A_0743.JPG	2018-07-19 15:24:47	58.51633056	-135.93417222	224	Abundance	0	0	1	1	Good	LFT	2018-09-26	SO-2017.1	0
SO_C_20180719_A_0744.JPG	2018-07-19 15:24:48	58.51633611	-135.93335556	224	Abundance	0	0	1	1	Good	LFT	2018-09-26	SO-2017.1	0
SO_C_20180719_A_0745.JPG	2018-07-19 15:24:49	58.51634167	-135.93253333	224	Abundance	0	0	1	1	Good	LFT	2018-09-26	SO-2017.1	0
SO_C_20180719_A_0746.JPG	2018-07-19 15:24:50	58.51635000	-135.93171111	224	Abundance	0	0	1	1	Good	LFT	2018-09-26	SO-2017.1	0
SO_C_20180719_A_0747.JPG	2018-07-19 15:24:51	58.51636389	-135.93088889	223	Abundance	0	0	1	1	Good	LFT	2018-09-26	SO-2017.1	0
SO_C_20180719_A_0748.JPG	2018-07-19 15:24:52	58.51637500	-135.93006667	223	Abundance	0	0	1	1	Good	LFT	2018-09-26	SO-2017.1	0
SO_C_20180719_A_0749.JPG	2018-07-19 15:24:53	58.51638889	-135.92924167	222	Abundance	0	0	1	0	Good	LFT	2018-09-26	SO-2017.1	0
SO_C_20180719_A_0750.JPG	2018-07-19 15:24:54	58.51640556	-135.92841667	222	Abundance	0	0	1	0	Good	LFT	2018-09-26	SO-2017.1	0
SO_C_20180719_A_0751.JPG	2018-07-19 15:24:55	58.51641944	-135.92759167	222	Abundance	0	0	1	0	Good	LFT	2018-09-26	SO-2017.1	0
SO_C_20180719_A_0752.JPG	2018-07-19 15:24:56	58.51643611	-135.92676944	222	Abundance	0	0	1	0	Good	LFT	2018-09-26	SO-2017.1	0
SO_C_20180719_A_0753.JPG	2018-07-19 15:24:57	58.51645000	-135.92593889	222	Abundance	0	0	1	0	Good	LFT	2018-09-26	SO-2017.1	0
SO_C_20180719_A_0754.JPG	2018-07-19 15:24:58	58.51646667	-135.92511111	222	Abundance	0	0	1	0	Good	LFT	2018-09-26	SO-2017.1	0
SO_C_20180719_A_0755.JPG	2018-07-19 15:24:59	58.51648056	-135.92428333	223	Abundance	0	0	1	0	Good	LFT	2018-09-26	SO-2017.1	0
SO_C_20180719_A_0756.JPG	2018-07-19 15:25:00	58.51650000	-135.92346389	223	Abundance	0	0	1	0	Good	LFT	2018-09-26	SO-2017.1	0
SO_C_20180719_A_0757.JPG	2018-07-19 15:25:01	58.51651944	-135.92264167	224	Abundance	0	0	1	0	Good	LFT	2018-09-26	SO-2017.1	0
SO_C_20180719_A_0758.JPG	2018-07-19 15:25:02	58.51653889	-135.92181389	224	Abundance	0	0	1	0	Good	LFT	2018-09-26	SO-2017.1	0
SO_C_20180719_A_0759.JPG	2018-07-19 15:25:03	58.51655833	-135.92098611	224	Abundance	0	0	1	0	Good	LFT	2018-09-26	SO-2017.1	0
SO_C_20180719_A_0760.JPG	2018-07-19 15:25:04	58.51657778	-135.92015556	224	Abundance	0	0	1	0	Good	LFT	2018-09-26	SO-2017.1	0
SO_C_20180719_A_0761.JPG	2018-07-19 15:25:05	58.51659167	-135.91932778	224	Abundance	0	0	1	0	Good	LFT	2018-09-26	SO-2017.1	0
SO_C_20180719_A_0762.JPG	2018-07-19 15:25:06	58.51660278	-135.91849722	224	Abundance	0	0	1	0	Good	LFT	2018-09-26	SO-2017.1	0
SO_C_20180719_A_0763.JPG	2018-07-19 15:25:07	58.51661111	-135.91766667	224	Abundance	0	0	1	0	Good	LFT	2018-09-26	SO-2017.1	0
SO_C_20180719_A_0764.JPG	2018-07-19 15:25:08	58.51661667	-135.91683611	224	Abundance	0	0	1	0	Good	LFT	2018-09-26	SO-2017.1	0
SO_C_20180719_A_0765.JPG	2018-07-19 15:25:09	58.51662500	-135.91601111	222	Abundance	0	0	1	0	Good	LFT	2018-09-26	SO-2017.1	0
SO_C_20180719_A_0766.JPG	2018-07-19 15:25:10	58.51663056	-135.91518333	222	Abundance	0	0	1	0	Good	LFT	2018-09-26	SO-2017.1	0
SO_C_20180719_A_0767.JPG	2018-07-19 15:25:11	58.51663611	-135.91435556	222	Abundance	0	0	1	0	Good	LFT	2018-09-26	SO-2017.1	0
SO_C_20180719_A_0768.JPG	2018-07-19 15:25:12	58.51664444	-135.91353333	221	Abundance	0	0	1	0	Good	LFT	2018-09-26	SO-2017.1	0
SO_C_20180719_A_0769.JPG	2018-07-19 15:25:13	58.51665556	-135.91271389	219	Abundance	0	0	1	0	Good	LFT	2018-09-26	SO-2017.1	0
SO_C_20180719_A_0770.JPG	2018-07-19 15:25:14	58.51666944	-135.91190000	219	Abundance	0	0	1	0	Good	LFT	2018-09-26	SO-2017.1	0
SO_C_20180719_A_0771.JPG	2018-07-19 15:25:15	58.51668333	-135.91108889	218	Abundance	0	0	1	0	Good	LFT	2018-09-26	SO-2017.1	0
SO_C_20180719_A_0772.JPG	2018-07-19 15:25:16	58.51669722	-135.91027778	218	Abundance	0	0	1	0	Good	LFT	2018-09-26	SO-2017.1	0
SO_C_20180719_A_0773.JPG	2018-07-19 15:25:17	58.51670833	-135.90946667	218	Abundance	0	0	1	0	Good	LFT	2018-09-26	SO-2017.1	0
SO_C_20180719_A_0774.JPG	2018-07-19 15:25:18	58.51671944	-135.90865556	218	Abundance	0	0	1	0	Good	LFT	2018-09-26	SO-2017.1	0
SO_C_20180719_A_0775.JPG	2018-07-19 15:25:19	58.51672778	-135.90784167	218	Abundance	0	0	1	0	Good	LFT	2018-09-26	SO-2017.1	0
SO_C_20180719_A_0776.JPG	2018-07-19 15:25:20	58.51673333	-135.90703056	218	Abundance	0	0	1	0	Good	LFT	2018-09-26	SO-2017.1	0
SO_C_20180719_A_0777.JPG	2018-07-19 15:25:21	58.51673611	-135.90621944	218	Abundance	0	0	0	0	Good	LFT	2018-09-26	SO-2017.1	0
SO_C_20180719_A_0778.JPG	2018-07-19 15:25:22	58.51673611	-135.90540556	218	Abundance	0	0	0	0	Good	LFT	2018-09-26	SO-2017.1	0
SO_C_20180719_A_0779.JPG	2018-07-19 15:25:23	58.51673611	-135.90459444	218	Abundance	0	0	0	0	Good	LFT	2018-09-26	SO-2017.1	0
SO_C_20180719_A_0780.JPG	2018-07-19 15:25:24	58.51673333	-135.90378056	218	Abundance	0	0	1	0	Good	LFT	2018-09-26	SO-2017.1	0
SO_C_20180719_A_0781.JPG	2018-07-19 15:25:25	58.51673056	-135.90296944	218	Abundance	0	0	0	0	Good	LFT	2018-09-26	SO-2017.1	0
SO_C_20180719_A_0782.JPG	2018-07-19 15:25:26	58.51673056	-135.90216111	218	Abundance	0	0	0	0	Good	LFT	2018-09-26	SO-2017.1	0
SO_C_20180719_A_0783.JPG	2018-07-19 15:25:27	58.51673333	-135.90135556	217	Abundance	0	0	1	0	Good	LFT	2018-09-26	SO-2017.1	0
SO_C_20180719_A_0784.JPG	2018-07-19 15:25:28	58.51673611	-135.90054444	217	Abundance	0	0	0	0	Good	LFT	2018-09-26	SO-2017.1	0
SO_C_20180719_A_0785.JPG	2018-07-19 15:25:29	58.51673889	-135.89973611	217	Abundance	0	0	1	0	Good	LFT	2018-09-26	SO-2017.1	0
SO_C_20180719_A_0786.JPG	2018-07-19 15:25:30	58.51674167	-135.89892500	217	Abundance	0	0	0	0	Good	LFT	2018-09-26	SO-2017.1	0
SO_C_20180719_A_0787.JPG	2018-07-19 15:25:31	58.51674444	-135.89811389	217	Abundance	0	0	0	0	Good	LFT	2018-09-26	SO-2017.1	0
SO_C_20180719_A_0788.JPG	2018-07-19 15:25:32	58.51674167	-135.89730278	217	Abundance	0	0	1	0	Good	LFT	2018-09-26	SO-2017.1	0
SO_C_20180719_A_0789.JPG	2018-07-19 15:25:33	58.51673611	-135.89649722	216	Abundance	0	0	1	0	Good	LFT	2018-09-26	SO-2017.1	0
SO_C_20180719_A_0790.JPG	2018-07-19 15:25:34	58.51673056	-135.89569167	216	Abundance	0	0	1	0	Good	LFT	2018-09-26	SO-2017.1	0
SO_C_20180719_A_0791.JPG	2018-07-19 15:25:35	58.51671944	-135.89488333	216	Abundance	0	0	1	0	Good	LFT	2018-09-26	SO-2017.1	0
SO_C_20180719_A_0792.JPG	2018-07-19 15:25:36	58.51670278	-135.89407778	217	Abundance	0	0	1	0	Good	LFT	2018-09-26	SO-2017.1	0
SO_C_20180719_A_0793.JPG	2018-07-19 15:25:37	58.51668889	-135.89327222	217	Abundance	0	0	1	0	Good	LFT	2018-09-26	SO-2017.1	0
SO_C_20180719_A_0794.JPG	2018-07-19 15:25:38	58.51667778	-135.89246944	217	Abundance	0	0	1	0	Good	LFT	2018-09-26	SO-2017.1	0
SO_C_20180719_A_0795.JPG	2018-07-19 15:25:39	58.51666389	-135.89167222	217	Abundance	0	0	1	0	Good	LFT	2018-09-26	SO-2017.1	0
SO_C_20180719_A_0796.JPG	2018-07-19 15:25:40	58.51665278	-135.89087500	217	Abundance	0	0	1	0	Good	LFT	2018-09-26	SO-2017.1	0
SO_C_20180719_A_0797.JPG	2018-07-19 15:25:41	58.51664444	-135.89008056	217	Abundance	0	0	1	0	Good	LFT	2018-09-26	SO-2017.1	0
SO_C_20180719_A_0798.JPG	2018-07-19 15:25:42	58.51663889	-135.88928889	217	Abundance	0	0	1	0	Good	LFT	2018-09-26	SO-2017.1	0
SO_C_20180719_A_0799.JPG	2018-07-19 15:27:38	58.52066944	-135.88126389	215	Abundance	0	0	1	0	Good	LFT	2018-09-26	SO-2017.1	0
SO_C_20180719_A_0800.JPG	2018-07-19 15:27:39	58.52066389	-135.88207500	215	Abundance	0	0	1	0	Good	LFT	2018-09-26	SO-2017.1	0
SO_C_20180719_A_0801.JPG	2018-07-19 15:27:40	58.52066944	-135.88289167	215	Abundance	0	0	1	1	Good	LFT	2018-09-26	SO-2017.1	0
SO_C_20180719_A_0802.JPG	2018-07-19 15:27:41	58.52067778	-135.88370833	216	Abundance	0	0	0	1	Good	LFT	2018-09-26	SO-2017.1	0
SO_C_20180719_A_0803.JPG	2018-07-19 15:27:42	58.52068333	-135.88452500	216	Abundance	0	0	0	1	Good	LFT	2018-09-26	SO-2017.1	0
SO_C_20180719_A_0804.JPG	2018-07-19 15:27:43	58.52068333	-135.88533889	216	Abundance	0	0	0	1	Good	LFT	2018-09-26	SO-2017.1	0
SO_C_20180719_A_0805.JPG	2018-07-19 15:27:44	58.52067778	-135.88615000	217	Abundance	0	0	0	1	Good	LFT	2018-09-26	SO-2017.1	0
SO_C_20180719_A_0806.JPG	2018-07-19 15:27:45	58.52066667	-135.88695833	218	Abundance	0	0	0	1	Good	LFT	2018-09-26	SO-2017.1	0
SO_C_20180719_A_0807.JPG	2018-07-19 15:27:46	58.52065278	-135.88776667	218	Abundance	0	0	1	1	Good	LFT	2018-09-26	SO-2017.1	0
SO_C_20180719_A_0808.JPG	2018-07-19 15:27:47	58.52063889	-135.88857222	219	Abundance	0	0	1	0	Good	LFT	2018-09-26	SO-2017.1	0
SO_C_20180719_A_0809.JPG	2018-07-19 15:27:48	58.52061667	-135.88937778	220	Abundance	0	0	0	0	Good	LFT	2018-09-26	SO-2017.1	0
SO_C_20180719_A_0810.JPG	2018-07-19 15:27:49	58.52059167	-135.89018333	220	Abundance	0	0	0	0	Good	LFT	2018-09-26	SO-2017.1	0
SO_C_20180719_A_0811.JPG	2018-07-19 15:27:50	58.52055556	-135.89098889	221	Abundance	0	0	0	0	Good	LFT	2018-09-26	SO-2017.1	0
SO_C_20180719_A_0812.JPG	2018-07-19 15:27:51	58.52051389	-135.89179167	222	Abundance	0	0	0	0	Good	LFT	2018-09-26	SO-2017.1	0
SO_C_20180719_A_0813.JPG	2018-07-19 15:27:52	58.52046667	-135.89259444	222	Abundance	0	0	0	0	Good	LFT	2018-09-26	SO-2017.1	0
SO_C_20180719_A_0814.JPG	2018-07-19 15:27:53	58.52041944	-135.89339444	222	Abundance	0	0	0	0	Good	LFT	2018-09-26	SO-2017.1	0
SO_C_20180719_A_0815.JPG	2018-07-19 15:27:54	58.52037500	-135.89419167	222	Abundance	0	0	0	0	Good	LFT	2018-09-26	SO-2017.1	0
SO_C_20180719_A_0816.JPG	2018-07-19 15:27:55	58.52033611	-135.89499444	222	Abundance	0	0	0	0	Good	LFT	2018-09-26	SO-2017.1	0
SO_C_20180719_A_0817.JPG	2018-07-19 15:27:56	58.52030833	-135.89579722	223	Abundance	0	0	0	0	Good	LFT	2018-09-26	SO-2017.1	0
SO_C_20180719_A_0818.JPG	2018-07-19 15:27:57	58.52028611	-135.89660278	223	Abundance	0	0	0	0	Good	LFT	2018-09-26	SO-2017.1	0
SO_C_20180719_A_0819.JPG	2018-07-19 15:27:58	58.52026667	-135.89740556	223	Abundance	0	0	0	0	Good	LFT	2018-09-26	SO-2017.1	0
SO_C_20180719_A_0820.JPG	2018-07-19 15:27:59	58.52025556	-135.89821667	224	Abundance	0	0	0	0	Good	LFT	2018-09-26	SO-2017.1	0
SO_C_20180719_A_0821.JPG	2018-07-19 15:28:00	58.52025000	-135.89903056	224	Abundance	0	0	1	0	Good	LFT	2018-09-26	SO-2017.1	0
SO_C_20180719_A_0822.JPG	2018-07-19 15:28:01	58.52024722	-135.89985000	225	Abundance	0	0	1	0	Good	LFT	2018-09-26	SO-2017.1	0
SO_C_20180719_A_0823.JPG	2018-07-19 15:28:02	58.52024444	-135.90067222	225	Abundance	0	0	0	0	Good	LFT	2018-09-26	SO-2017.1	0
SO_C_20180719_A_0824.JPG	2018-07-19 15:28:03	58.52024167	-135.90149167	225	Abundance	0	0	1	0	Good	LFT	2018-09-26	SO-2017.1	0
SO_C_20180719_A_0825.JPG	2018-07-19 15:28:04	58.52023611	-135.90231389	225	Abundance	0	0	1	0	Good	LFT	2018-09-26	SO-2017.1	0
SO_C_20180719_A_0826.JPG	2018-07-19 15:28:05	58.52023333	-135.90313056	225	Abundance	0	0	0	0	Good	LFT	2018-09-26	SO-2017.1	0
SO_C_20180719_A_0827.JPG	2018-07-19 15:28:06	58.52023056	-135.90394722	224	Abundance	0	0	1	0	Good	LFT	2018-09-26	SO-2017.1	0
SO_C_20180719_A_0828.JPG	2018-07-19 15:28:07	58.52022778	-135.90476111	224	Abundance	0	0	1	0	Good	LFT	2018-09-26	SO-2017.1	0
SO_C_20180719_A_0829.JPG	2018-07-19 15:28:08	58.52022500	-135.90557778	224	Abundance	0	0	1	0	Good	LFT	2018-09-26	SO-2017.1	0
SO_C_20180719_A_0830.JPG	2018-07-19 15:28:09	58.52022222	-135.90638889	224	Abundance	0	0	1	0	Good	LFT	2018-09-26	SO-2017.1	0
SO_C_20180719_A_0831.JPG	2018-07-19 15:28:10	58.52021944	-135.90720556	224	Abundance	0	0	1	0	Good	LFT	2018-09-26	SO-2017.1	0
SO_C_20180719_A_0832.JPG	2018-07-19 15:28:11	58.52021667	-135.90802222	224	Abundance	0	0	1	0	Good	LFT	2018-09-26	SO-2017.1	0
SO_C_20180719_A_0833.JPG	2018-07-19 15:28:12	58.52021111	-135.90884167	224	Abundance	0	0	1	0	Good	LFT	2018-09-26	SO-2017.1	0
SO_C_20180719_A_0834.JPG	2018-07-19 15:28:13	58.52020556	-135.90966111	224	Abundance	0	0	1	0	Good	LFT	2018-09-26	SO-2017.1	0
SO_C_20180719_A_0835.JPG	2018-07-19 15:28:14	58.52019722	-135.91048056	224	Abundance	0	0	1	0	Good	LFT	2018-09-26	SO-2017.1	0
SO_C_20180719_A_0836.JPG	2018-07-19 15:28:15	58.52018889	-135.91130000	224	Abundance	0	0	1	0	Good	LFT	2018-09-26	SO-2017.1	0
SO_C_20180719_A_0837.JPG	2018-07-19 15:28:16	58.52017778	-135.91212222	224	Abundance	0	0	1	0	Good	LFT	2018-09-26	SO-2017.1	0
SO_C_20180719_A_0838.JPG	2018-07-19 15:28:17	58.52016944	-135.91294167	224	Abundance	0	0	1	0	Good	LFT	2018-09-26	SO-2017.1	0
SO_C_20180719_A_0839.JPG	2018-07-19 15:28:18	58.52016111	-135.91376667	223	Abundance	0	0	1	0	Good	LFT	2018-09-26	SO-2017.1	0
SO_C_20180719_A_0840.JPG	2018-07-19 15:28:19	58.52015278	-135.91458889	223	Abundance	0	0	0	0	Good	LFT	2018-09-26	SO-2017.1	0
SO_C_20180719_A_0841.JPG	2018-07-19 15:28:20	58.52014722	-135.91540833	222	Abundance	0	0	1	0	Good	LFT	2018-09-26	SO-2017.1	0
SO_C_20180719_A_0842.JPG	2018-07-19 15:28:21	58.52013889	-135.91622778	221	Abundance	0	0	1	0	Good	LFT	2018-09-26	SO-2017.1	0
SO_C_20180719_A_0843.JPG	2018-07-19 15:28:22	58.52013056	-135.91704444	221	Abundance	0	0	1	1	Good	LFT	2018-09-26	SO-2017.1	0
SO_C_20180719_A_0844.JPG	2018-07-19 15:28:23	58.52012500	-135.91785556	220	Abundance	0	0	0	1	Good	LFT	2018-09-26	SO-2017.1	0
SO_C_20180719_A_0845.JPG	2018-07-19 15:28:24	58.52012222	-135.91866389	220	Abundance	0	0	0	1	Good	LFT	2018-09-26	SO-2017.1	0
SO_C_20180719_A_0846.JPG	2018-07-19 15:28:25	58.52011944	-135.91946944	219	Abundance	0	0	0	1	Good	LFT	2018-09-26	SO-2017.1	0
SO_C_20180719_A_0847.JPG	2018-07-19 15:28:26	58.52011944	-135.92026944	219	Abundance	0	0	0	1	Good	LFT	2018-09-26	SO-2017.1	0
SO_C_20180719_A_0848.JPG	2018-07-19 15:28:27	58.52011944	-135.92106944	219	Abundance	0	0	0	1	Good	LFT	2018-09-26	SO-2017.1	0
SO_C_20180719_A_0849.JPG	2018-07-19 15:28:28	58.52012500	-135.92186667	219	Abundance	0	0	0	1	Good	LFT	2018-09-26	SO-2017.1	0
SO_C_20180719_A_0850.JPG	2018-07-19 15:28:29	58.52012778	-135.92266111	219	Abundance	0	0	0	1	Good	LFT	2018-09-26	SO-2017.1	0
SO_C_20180719_A_0851.JPG	2018-07-19 15:28:30	58.52013333	-135.92345556	219	Abundance	0	0	0	1	Good	LFT	2018-09-26	SO-2017.1	0
SO_C_20180719_A_0852.JPG	2018-07-19 15:28:31	58.52013889	-135.92424722	219	Abundance	0	0	0	1	Good	LFT	2018-09-26	SO-2017.1	0
SO_C_20180719_A_0853.JPG	2018-07-19 15:28:32	58.52014722	-135.92503889	219	Abundance	0	0	0	1	Good	LFT	2018-09-26	SO-2017.1	0
SO_C_20180719_A_0854.JPG	2018-07-19 15:28:33	58.52015556	-135.92583333	218	Abundance	0	0	0	1	Good	LFT	2018-09-26	SO-2017.1	0
SO_C_20180719_A_0855.JPG	2018-07-19 15:28:34	58.52016389	-135.92662222	218	Abundance	0	0	0	1	Good	LFT	2018-09-26	SO-2017.1	0
SO_C_20180719_A_0856.JPG	2018-07-19 15:28:35	58.52017222	-135.92741389	218	Abundance	0	0	1	1	Good	LFT	2018-09-26	SO-2017.1	0
SO_C_20180719_A_0857.JPG	2018-07-19 15:28:36	58.52018056	-135.92820556	218	Abundance	0	0	1	0	Good	LFT	2018-09-26	SO-2017.1	0
SO_C_20180719_A_0858.JPG	2018-07-19 15:28:37	58.52018611	-135.92900000	218	Abundance	0	0	1	0	Good	LFT	2018-09-26	SO-2017.1	0
SO_C_20180719_A_0859.JPG	2018-07-19 15:28:38	58.52019167	-135.92979444	218	Abundance	0	0	1	0	Good	LFT	2018-09-26	SO-2017.1	0
SO_C_20180719_A_0860.JPG	2018-07-19 15:28:39	58.52019167	-135.93058611	218	Abundance	0	0	1	0	Good	LFT	2018-09-26	SO-2017.1	0
SO_C_20180719_A_0861.JPG	2018-07-19 15:28:40	58.52019167	-135.93138056	218	Abundance	0	0	1	0	Good	LFT	2018-09-26	SO-2017.1	0
SO_C_20180719_A_0862.JPG	2018-07-19 15:28:41	58.52018611	-135.93217500	219	Abundance	0	0	1	0	Good	LFT	2018-09-26	SO-2017.1	0
SO_C_20180719_A_0863.JPG	2018-07-19 15:28:42	58.52017778	-135.93296944	219	Abundance	0	0	1	0	Good	LFT	2018-09-26	SO-2017.1	0
SO_C_20180719_A_0864.JPG	2018-07-19 15:28:43	58.52016667	-135.93376111	219	Abundance	0	0	1	0	Good	LFT	2018-09-26	SO-2017.1	0
SO_C_20180719_A_0865.JPG	2018-07-19 15:28:44	58.52015000	-135.93455278	219	Abundance	0	0	1	0	Good	LFT	2018-09-26	SO-2017.1	0
SO_C_20180719_A_0866.JPG	2018-07-19 15:28:45	58.52012500	-135.93534444	219	Abundance	0	0	1	0	Good	LFT	2018-09-26	SO-2017.1	0
SO_C_20180719_A_0867.JPG	2018-07-19 15:28:46	58.52009722	-135.93613056	220	Abundance	0	0	1	0	Good	LFT	2018-09-26	SO-2017.1	0
SO_C_20180719_A_0868.JPG	2018-07-19 15:28:47	58.52006667	-135.93691944	220	Abundance	0	0	1	0	Good	LFT	2018-09-26	SO-2017.1	0
SO_C_20180719_A_0869.JPG	2018-07-19 15:28:48	58.52003889	-135.93771389	220	Abundance	0	0	1	1	Good	LFT	2018-09-26	SO-2017.1	0
SO_C_20180719_A_0870.JPG	2018-07-19 15:28:49	58.52000833	-135.93850833	221	Abundance	0	0	1	1	Good	LFT	2018-09-26	SO-2017.1	0
SO_C_20180719_A_0871.JPG	2018-07-19 15:28:50	58.51997778	-135.93930278	221	Abundance	0	0	1	1	Good	LFT	2018-09-26	SO-2017.1	0
SO_C_20180719_A_0872.JPG	2018-07-19 15:28:51	58.51995278	-135.94010000	221	Abundance	0	0	1	1	Good	LFT	2018-09-26	SO-2017.1	0
SO_C_20180719_A_0873.JPG	2018-07-19 15:28:52	58.51992778	-135.94090000	221	Abundance	0	0	1	1	Good	LFT	2018-09-26	SO-2017.1	0
SO_C_20180719_A_0874.JPG	2018-07-19 15:28:53	58.51990278	-135.94169722	221	Abundance	0	0	1	1	Good	LFT	2018-09-26	SO-2017.1	0
SO_C_20180719_A_0875.JPG	2018-07-19 15:28:54	58.51988333	-135.94249444	221	Abundance	0	0	1	0	Good	LFT	2018-09-26	SO-2017.1	0
SO_C_20180719_A_0876.JPG	2018-07-19 15:28:55	58.51986389	-135.94328889	221	Abundance	0	0	1	0	Good	LFT	2018-09-26	SO-2017.1	0
SO_C_20180719_A_0877.JPG	2018-07-19 15:28:56	58.51985000	-135.94408333	221	Abundance	0	0	1	0	Good	LFT	2018-09-26	SO-2017.1	0
SO_C_20180719_A_0878.JPG	2018-07-19 15:28:57	58.51983889	-135.94488056	221	Abundance	0	0	0	0	Good	LFT	2018-09-26	SO-2017.1	0
SO_C_20180719_A_0879.JPG	2018-07-19 15:28:58	58.51983611	-135.94567778	221	Abundance	0	0	1	0	Good	LFT	2018-09-26	SO-2017.1	0
SO_C_20180719_A_0880.JPG	2018-07-19 15:28:59	58.51983333	-135.94647500	221	Abundance	0	0	1	0	Good	LFT	2018-09-26	SO-2017.1	0
SO_C_20180719_A_0881.JPG	2018-07-19 15:29:00	58.51983333	-135.94727778	221	Abundance	0	0	1	0	Good	LFT	2018-09-26	SO-2017.1	0
SO_C_20180719_A_0882.JPG	2018-07-19 15:29:01	58.51983889	-135.94807778	221	Abundance	0	0	1	0	Good	LFT	2018-09-26	SO-2017.1	0
SO_C_20180719_A_0883.JPG	2018-07-19 15:29:02	58.51984444	-135.94888333	221	Abundance	0	0	0	0	Good	LFT	2018-09-26	SO-2017.1	0
SO_C_20180719_A_0884.JPG	2018-07-19 15:29:03	58.51985278	-135.94968889	222	Abundance	1	0	1	0	Good	LFT	2018-09-26	SO-2017.1	0
SO_C_20180719_A_0885.JPG	2018-07-19 15:29:04	58.51985278	-135.95050000	222	Abundance	0	0	1	0	Good	LFT	2018-09-26	SO-2017.1	0
SO_C_20180719_A_0886.JPG	2018-07-19 15:29:05	58.51985278	-135.95131667	222	Abundance	1	0	1	0	Good	LFT	2018-09-26	SO-2017.1	0
SO_C_20180719_A_0887.JPG	2018-07-19 15:29:06	58.51984722	-135.95213333	222	Abundance	0	0	0	0	Good	LFT	2018-09-26	SO-2017.1	0
SO_C_20180719_A_0888.JPG	2018-07-19 15:29:07	58.51984167	-135.95295278	222	Abundance	0	0	1	0	Good	LFT	2018-09-26	SO-2017.1	0
SO_C_20180719_A_0889.JPG	2018-07-19 15:29:08	58.51983333	-135.95377500	221	Abundance	0	0	1	0	Good	LFT	2018-09-26	SO-2017.1	0
SO_C_20180719_A_0890.JPG	2018-07-19 15:29:09	58.51981944	-135.95459444	221	Abundance	0	0	1	0	Good	LFT	2018-09-26	SO-2017.1	0
SO_C_20180719_A_0891.JPG	2018-07-19 15:29:10	58.51980556	-135.95541944	221	Abundance	0	0	1	0	Good	LFT	2018-09-26	SO-2017.1	0
SO_C_20180719_A_0892.JPG	2018-07-19 15:29:11	58.51979444	-135.95624167	221	Abundance	0	0	0	0	Good	LFT	2018-09-26	SO-2017.1	0
SO_C_20180719_A_0893.JPG	2018-07-19 15:29:12	58.51978056	-135.95706944	220	Abundance	0	0	0	0	Good	LFT	2018-09-26	SO-2017.1	0
SO_C_20180719_A_0894.JPG	2018-07-19 15:29:13	58.51976389	-135.95789722	220	Abundance	0	0	0	0	Good	LFT	2018-09-26	SO-2017.1	0
SO_C_20180719_A_0895.JPG	2018-07-19 15:29:14	58.51975000	-135.95872222	220	Abundance	0	0	0	0	Good	LFT	2018-09-26	SO-2017.1	0
SO_C_20180719_A_0896.JPG	2018-07-19 15:29:15	58.51973333	-135.95954722	220	Abundance	0	0	0	0	Good	LFT	2018-09-26	SO-2017.1	0
SO_C_20180719_A_0897.JPG	2018-07-19 15:29:16	58.51972222	-135.96037500	220	Abundance	0	0	0	0	Good	LFT	2018-09-26	SO-2017.1	0
SO_C_20180719_A_0898.JPG	2018-07-19 15:29:17	58.51971111	-135.96120556	220	Abundance	0	0	1	0	Good	LFT	2018-09-26	SO-2017.1	0
SO_C_20180719_A_0899.JPG	2018-07-19 15:29:18	58.51970000	-135.96203333	220	Abundance	0	0	0	0	Good	LFT	2018-09-26	SO-2017.1	0
SO_C_20180719_A_0900.JPG	2018-07-19 15:29:19	58.51969444	-135.96286389	219	Abundance	0	0	0	0	Good	LFT	2018-09-26	SO-2017.1	0
SO_C_20180719_A_0901.JPG	2018-07-19 15:29:20	58.51969167	-135.96369167	219	Abundance	0	0	0	0	Good	LFT	2018-09-26	SO-2017.1	0
SO_C_20180719_A_0902.JPG	2018-07-19 15:29:21	58.51968889	-135.96452500	219	Abundance	0	0	1	0	Good	LFT	2018-09-26	SO-2017.1	0
SO_C_20180719_A_0903.JPG	2018-07-19 15:29:22	58.51968889	-135.96535556	218	Abundance	0	0	1	0	Good	LFT	2018-09-26	SO-2017.1	0
SO_C_20180719_A_0904.JPG	2018-07-19 15:29:23	58.51969167	-135.96618611	218	Abundance	1	0	1	0	Good	LFT	2018-09-26	SO-2017.1	0
SO_C_20180719_A_0905.JPG	2018-07-19 15:29:24	58.51969444	-135.96701667	218	Abundance	0	0	1	0	Good	LFT	2018-09-26	SO-2017.1	0
SO_C_20180719_A_0906.JPG	2018-07-19 15:29:25	58.51970000	-135.96785000	217	Abundance	0	0	1	0	Good	LFT	2018-09-26	SO-2017.1	0
SO_C_20180719_A_0907.JPG	2018-07-19 15:29:26	58.51970278	-135.96868333	217	Abundance	0	0	0	0	Good	LFT	2018-09-26	SO-2017.1	0
SO_C_20180719_A_0908.JPG	2018-07-19 15:29:27	58.51970833	-135.96951667	217	Abundance	0	0	0	0	Good	LFT	2018-09-26	SO-2017.1	0
SO_C_20180719_A_0909.JPG	2018-07-19 15:29:28	58.51971389	-135.97035000	216	Abundance	0	0	0	0	Good	LFT	2018-09-26	SO-2017.1	0
SO_C_20180719_A_0910.JPG	2018-07-19 15:29:29	58.51971944	-135.97118333	216	Abundance	0	0	0	0	Good	LFT	2018-09-26	SO-2017.1	0
SO_C_20180719_A_0911.JPG	2018-07-19 15:29:30	58.51972500	-135.97201389	216	Abundance	0	0	0	0	Good	LFT	2018-09-26	SO-2017.1	0
SO_C_20180719_A_0912.JPG	2018-07-19 15:29:31	58.51973056	-135.97284167	216	Abundance	0	0	0	0	Good	LFT	2018-09-26	SO-2017.1	0
SO_C_20180719_A_0913.JPG	2018-07-19 15:29:32	58.51973889	-135.97366944	216	Abundance	0	0	0	0	Good	LFT	2018-09-26	SO-2017.1	0
SO_C_20180719_A_0914.JPG	2018-07-19 15:29:33	58.51974444	-135.97449722	216	Abundance	0	0	0	0	Good	LFT	2018-09-26	SO-2017.1	0
SO_C_20180719_A_0915.JPG	2018-07-19 15:29:34	58.51975000	-135.97532500	216	Abundance	0	0	1	0	Good	LFT	2018-09-26	SO-2017.1	0
SO_C_20180719_A_0916.JPG	2018-07-19 15:29:35	58.51975556	-135.97615000	217	Abundance	1	0	1	0	Good	LFT	2018-09-26	SO-2017.1	0
SO_C_20180719_A_0917.JPG	2018-07-19 15:29:36	58.51975833	-135.97697500	217	Abundance	1	0	1	0	Good	LFT	2018-09-26	SO-2017.1	0
SO_C_20180719_A_0918.JPG	2018-07-19 15:29:37	58.51976111	-135.97780000	217	Abundance	1	0	1	0	Good	LFT	2018-09-26	SO-2017.1	0
SO_C_20180719_A_0919.JPG	2018-07-19 15:29:38	58.51976111	-135.97862222	218	Abundance	0	0	1	0	Good	LFT	2018-09-26	SO-2017.1	0
SO_C_20180719_A_0920.JPG	2018-07-19 15:29:39	58.51975833	-135.97944722	218	Abundance	0	0	0	0	Good	LFT	2018-09-26	SO-2017.1	0
SO_C_20180719_A_0921.JPG	2018-07-19 15:29:40	58.51975278	-135.98026944	219	Abundance	0	0	1	0	Good	LFT	2018-09-26	SO-2017.1	0
SO_C_20180719_A_0922.JPG	2018-07-19 15:29:41	58.51974444	-135.98109167	219	Abundance	0	0	0	0	Good	LFT	2018-09-26	SO-2017.1	0
SO_C_20180719_A_0923.JPG	2018-07-19 15:29:42	58.51973611	-135.98191389	219	Abundance	0	0	0	0	Good	LFT	2018-09-26	SO-2017.1	0
SO_C_20180719_A_0924.JPG	2018-07-19 15:29:43	58.51972222	-135.98273333	220	Abundance	0	0	0	0	Good	LFT	2018-09-26	SO-2017.1	0
SO_C_20180719_A_0925.JPG	2018-07-19 15:29:44	58.51970278	-135.98355556	220	Abundance	0	0	0	0	Good	LFT	2018-09-26	SO-2017.1	0
SO_C_20180719_A_0926.JPG	2018-07-19 15:29:45	58.51967778	-135.98437778	220	Abundance	0	0	0	0	Good	LFT	2018-09-26	SO-2017.1	0
SO_C_20180719_A_0927.JPG	2018-07-19 15:29:46	58.51965000	-135.98520000	221	Abundance	2	0	1	0	Good	LFT	2018-09-26	SO-2017.1	0
SO_C_20180719_A_0928.JPG	2018-07-19 15:29:47	58.51962222	-135.98602222	221	Abundance	2	0	1	1	Good	LFT	2018-09-26	SO-2017.1	0
SO_C_20180719_A_0929.JPG	2018-07-19 15:29:48	58.51959167	-135.98684444	221	Abundance	0	0	1	1	Good	LFT	2018-09-26	SO-2017.1	0
SO_C_20180719_A_0930.JPG	2018-07-19 15:29:49	58.51956389	-135.98766944	221	Abundance	0	0	1	1	Good	LFT	2018-09-26	SO-2017.1	0
SO_C_20180719_A_0931.JPG	2018-07-19 15:29:50	58.51953889	-135.98849444	221	Abundance	0	0	0	1	Good	LFT	2018-09-26	SO-2017.1	0
SO_C_20180719_A_0932.JPG	2018-07-19 15:32:12	58.52305556	-135.99145278	227	Abundance	0	0	1	0	Good	LFT	2018-09-26	SO-2017.1	0
SO_C_20180719_A_0933.JPG	2018-07-19 15:32:13	58.52307222	-135.99063889	226	Abundance	0	0	0	0	Good	LFT	2018-09-26	SO-2017.1	0
SO_C_20180719_A_0934.JPG	2018-07-19 15:32:14	58.52309167	-135.98982778	224	Abundance	0	0	0	0	Good	LFT	2018-09-26	SO-2017.1	0
SO_C_20180719_A_0935.JPG	2018-07-19 15:32:15	58.52311667	-135.98901389	223	Abundance	0	0	0	0	Good	LFT	2018-09-26	SO-2017.1	0
SO_C_20180719_A_0936.JPG	2018-07-19 15:32:16	58.52314444	-135.98819722	221	Abundance	0	0	0	0	Good	LFT	2018-09-26	SO-2017.1	0
SO_C_20180719_A_0937.JPG	2018-07-19 15:32:17	58.52317778	-135.98737778	220	Abundance	0	0	0	0	Good	LFT	2018-09-26	SO-2017.1	0
SO_C_20180719_A_0938.JPG	2018-07-19 15:32:18	58.52321389	-135.98656667	219	Abundance	0	0	0	0	Good	LFT	2018-09-26	SO-2017.1	0
SO_C_20180719_A_0939.JPG	2018-07-19 15:32:19	58.52325000	-135.98576111	218	Abundance	0	0	0	0	Good	LFT	2018-09-26	SO-2017.1	0
SO_C_20180719_A_0940.JPG	2018-07-19 15:32:20	58.52328889	-135.98496111	217	Abundance	0	0	0	0	Good	LFT	2018-09-26	SO-2017.1	0
SO_C_20180719_A_0941.JPG	2018-07-19 15:32:21	58.52332500	-135.98416111	216	Abundance	0	0	0	0	Good	LFT	2018-09-26	SO-2017.1	0
SO_C_20180719_A_0942.JPG	2018-07-19 15:32:22	58.52335833	-135.98336111	216	Abundance	0	0	0	0	Good	LFT	2018-09-26	SO-2017.1	0
SO_C_20180719_A_0943.JPG	2018-07-19 15:32:23	58.52339444	-135.98256667	215	Abundance	0	0	0	0	Good	LFT	2018-09-26	SO-2017.1	0
SO_C_20180719_A_0944.JPG	2018-07-19 15:32:24	58.52342778	-135.98176944	215	Abundance	0	0	0	0	Good	LFT	2018-09-26	SO-2017.1	0
SO_C_20180719_A_0945.JPG	2018-07-19 15:32:25	58.52345833	-135.98097500	214	Abundance	0	0	0	0	Good	LFT	2018-09-26	SO-2017.1	0
SO_C_20180719_A_0946.JPG	2018-07-19 15:32:26	58.52348611	-135.98018056	214	Abundance	0	0	0	0	Good	LFT	2018-09-26	SO-2017.1	0
SO_C_20180719_A_0947.JPG	2018-07-19 15:32:27	58.52350833	-135.97938611	214	Abundance	0	0	0	0	Good	LFT	2018-09-26	SO-2017.1	0
SO_C_20180719_A_0948.JPG	2018-07-19 15:32:28	58.52352500	-135.97859167	213	Abundance	0	0	1	0	Good	LFT	2018-09-26	SO-2017.1	0
SO_C_20180719_A_0949.JPG	2018-07-19 15:32:29	58.52353889	-135.97779722	213	Abundance	0	0	1	0	Good	LFT	2018-09-26	SO-2017.1	0
SO_C_20180719_A_0950.JPG	2018-07-19 15:32:30	58.52354444	-135.97700000	213	Abundance	0	0	1	0	Good	LFT	2018-09-26	SO-2017.1	0
SO_C_20180719_A_0951.JPG	2018-07-19 15:32:31	58.52355000	-135.97620278	212	Abundance	0	0	1	0	Good	LFT	2018-09-26	SO-2017.1	0
SO_C_20180719_A_0952.JPG	2018-07-19 15:32:32	58.52355000	-135.97540556	212	Abundance	0	0	0	0	Good	LFT	2018-09-26	SO-2017.1	0
SO_C_20180719_A_0953.JPG	2018-07-19 15:32:33	58.52355278	-135.97461667	212	Abundance	0	0	0	0	Good	LFT	2018-09-26	SO-2017.1	0
SO_C_20180719_A_0954.JPG	2018-07-19 15:32:34	58.52355278	-135.97382500	212	Abundance	0	0	0	0	Good	LFT	2018-09-26	SO-2017.1	0
SO_C_20180719_A_0955.JPG	2018-07-19 15:32:35	58.52355000	-135.97303611	212	Abundance	0	0	0	0	Good	LFT	2018-09-26	SO-2017.1	0
SO_C_20180719_A_0956.JPG	2018-07-19 15:32:36	58.52354444	-135.97224167	212	Abundance	0	0	0	0	Good	LFT	2018-09-26	SO-2017.1	0
SO_C_20180719_A_0957.JPG	2018-07-19 15:32:37	58.52353889	-135.97144444	211	Abundance	0	0	0	0	Good	LFT	2018-09-26	SO-2017.1	0
SO_C_20180719_A_0958.JPG	2018-07-19 15:32:38	58.52353056	-135.97064444	211	Abundance	0	0	0	0	Good	LFT	2018-09-26	SO-2017.1	0
SO_C_20180719_A_0959.JPG	2018-07-19 15:32:39	58.52352222	-135.96984722	211	Abundance	0	0	0	0	Good	LFT	2018-09-26	SO-2017.1	0
SO_C_20180719_A_0960.JPG	2018-07-19 15:32:40	58.52351667	-135.96904444	211	Abundance	0	0	0	0	Good	LFT	2018-09-26	SO-2017.1	0
SO_C_20180719_A_0961.JPG	2018-07-19 15:32:41	58.52350556	-135.96824167	211	Abundance	0	0	0	0	Good	LFT	2018-09-26	SO-2017.1	0
SO_C_20180719_A_0962.JPG	2018-07-19 15:32:42	58.52349167	-135.96743333	211	Abundance	0	0	1	0	Good	LFT	2018-09-26	SO-2017.1	0
SO_C_20180719_A_0963.JPG	2018-07-19 15:32:43	58.52347778	-135.96662778	211	Abundance	0	0	0	0	Good	LFT	2018-09-26	SO-2017.1	0
SO_C_20180719_A_0964.JPG	2018-07-19 15:32:44	58.52346389	-135.96582500	211	Abundance	0	0	0	0	Good	LFT	2018-09-26	SO-2017.1	0
SO_C_20180719_A_0965.JPG	2018-07-19 15:32:45	58.52345278	-135.96501944	211	Abundance	0	0	0	0	Good	LFT	2018-09-26	SO-2017.1	0
SO_C_20180719_A_0966.JPG	2018-07-19 15:32:46	58.52344167	-135.96421667	212	Abundance	0	0	0	0	Good	LFT	2018-09-26	SO-2017.1	0
SO_C_20180719_A_0967.JPG	2018-07-19 15:32:47	58.52343889	-135.96340833	212	Abundance	0	0	0	0	Good	LFT	2018-09-26	SO-2017.1	0
SO_C_20180719_A_0968.JPG	2018-07-19 15:32:48	58.52343611	-135.96260556	212	Abundance	0	0	0	0	Good	LFT	2018-09-26	SO-2017.1	0
SO_C_20180719_A_0969.JPG	2018-07-19 15:32:49	58.52343611	-135.96179722	212	Abundance	0	0	1	0	Good	LFT	2018-09-26	SO-2017.1	0
SO_C_20180719_A_0970.JPG	2018-07-19 15:32:50	58.52343611	-135.96099167	212	Abundance	0	0	1	0	Good	LFT	2018-09-26	SO-2017.1	0
SO_C_20180719_A_0971.JPG	2018-07-19 15:32:51	58.52344167	-135.96018333	211	Abundance	0	0	1	0	Good	LFT	2018-09-26	SO-2017.1	0
SO_C_20180719_A_0972.JPG	2018-07-19 15:32:52	58.52344444	-135.95937500	211	Abundance	0	0	0	0	Good	LFT	2018-09-26	SO-2017.1	0
SO_C_20180719_A_0973.JPG	2018-07-19 15:32:53	58.52345000	-135.95856667	211	Abundance	0	0	1	0	Good	LFT	2018-09-26	SO-2017.1	0
SO_C_20180719_A_0974.JPG	2018-07-19 15:32:54	58.52345278	-135.95775833	211	Abundance	0	0	1	0	Good	LFT	2018-09-26	SO-2017.1	0
SO_C_20180719_A_0975.JPG	2018-07-19 15:32:55	58.52345833	-135.95695278	211	Abundance	0	0	1	0	Good	LFT	2018-09-26	SO-2017.1	0
SO_C_20180719_A_0976.JPG	2018-07-19 15:32:56	58.52346389	-135.95614444	211	Abundance	0	0	0	0	Good	LFT	2018-09-26	SO-2017.1	0
SO_C_20180719_A_0977.JPG	2018-07-19 15:32:57	58.52347222	-135.95533889	211	Abundance	0	0	0	0	Good	LFT	2018-09-26	SO-2017.1	0
SO_C_20180719_A_0978.JPG	2018-07-19 15:32:58	58.52348333	-135.95453333	212	Abundance	0	0	1	0	Good	LFT	2018-09-26	SO-2017.1	0
SO_C_20180719_A_0979.JPG	2018-07-19 15:32:59	58.52349722	-135.95372778	212	Abundance	0	0	1	0	Good	LFT	2018-09-26	SO-2017.1	0
SO_C_20180719_A_0980.JPG	2018-07-19 15:33:00	58.52351667	-135.95292778	212	Abundance	0	0	1	0	Good	LFT	2018-09-26	SO-2017.1	0
SO_C_20180719_A_0981.JPG	2018-07-19 15:33:01	58.52353333	-135.95211944	212	Abundance	0	0	1	0	Good	LFT	2018-09-26	SO-2017.1	0
SO_C_20180719_A_0982.JPG	2018-07-19 15:33:02	58.52355278	-135.95131389	213	Abundance	0	0	1	0	Good	LFT	2018-09-26	SO-2017.1	0
SO_C_20180719_A_0983.JPG	2018-07-19 15:33:03	58.52357222	-135.95050278	213	Abundance	0	0	1	0	Good	LFT	2018-09-26	SO-2017.1	0
SO_C_20180719_A_0984.JPG	2018-07-19 15:33:04	58.52359444	-135.94970000	213	Abundance	0	0	1	0	Good	LFT	2018-09-26	SO-2017.1	0
SO_C_20180719_A_0985.JPG	2018-07-19 15:33:05	58.52361667	-135.94889444	213	Abundance	0	0	1	0	Good	LFT	2018-09-26	SO-2017.1	0
SO_C_20180719_A_0986.JPG	2018-07-19 15:33:06	58.52363611	-135.94808611	214	Abundance	0	0	1	0	Good	LFT	2018-09-26	SO-2017.1	0
SO_C_20180719_A_0987.JPG	2018-07-19 15:33:07	58.52365556	-135.94727500	215	Abundance	0	0	1	0	Good	LFT	2018-09-26	SO-2017.1	0
SO_C_20180719_A_0988.JPG	2018-07-19 15:33:08	58.52366667	-135.94646111	215	Abundance	0	0	0	0	Good	LFT	2018-09-26	SO-2017.1	0
SO_C_20180719_A_0989.JPG	2018-07-19 15:33:09	58.52367778	-135.94564167	216	Abundance	0	0	1	0	Good	LFT	2018-09-26	SO-2017.1	0
SO_C_20180719_A_0990.JPG	2018-07-19 15:33:10	58.52368333	-135.94482222	216	Abundance	0	0	0	0	Good	LFT	2018-09-26	SO-2017.1	0
SO_C_20180719_A_0991.JPG	2018-07-19 15:33:11	58.52368611	-135.94400000	216	Abundance	0	0	0	0	Good	LFT	2018-09-26	SO-2017.1	0
SO_C_20180719_A_0992.JPG	2018-07-19 15:33:12	58.52368611	-135.94317500	216	Abundance	0	0	1	0	Good	LFT	2018-09-26	SO-2017.1	0
SO_C_20180719_A_0993.JPG	2018-07-19 15:33:13	58.52368056	-135.94234444	216	Abundance	0	0	1	0	Good	LFT	2018-09-26	SO-2017.1	0
SO_C_20180719_A_0994.JPG	2018-07-19 15:33:14	58.52367222	-135.94151667	216	Abundance	0	0	1	0	Good	LFT	2018-09-26	SO-2017.1	0
SO_C_20180719_A_0995.JPG	2018-07-19 15:33:15	58.52366389	-135.94069167	216	Abundance	0	0	1	0	Good	LFT	2018-09-26	SO-2017.1	0
SO_C_20180719_A_0996.JPG	2018-07-19 15:33:16	58.52365000	-135.93986389	215	Abundance	0	0	1	0	Good	LFT	2018-09-26	SO-2017.1	0
SO_C_20180719_A_0997.JPG	2018-07-19 15:33:17	58.52363333	-135.93903333	215	Abundance	0	0	1	0	Good	LFT	2018-09-26	SO-2017.1	0
SO_C_20180719_A_0998.JPG	2018-07-19 15:33:18	58.52361667	-135.93820833	214	Abundance	0	0	1	0	Good	LFT	2018-09-26	SO-2017.1	0
SO_C_20180719_A_0999.JPG	2018-07-19 15:33:19	58.52359444	-135.93738056	214	Abundance	0	0	1	1	Good	LFT	2018-09-26	SO-2017.1	0
SO_C_20180719_A_1000.JPG	2018-07-19 15:33:20	58.52357500	-135.93655556	214	Abundance	0	0	1	1	Good	LFT	2018-09-26	SO-2017.1	0
SO_C_20180719_A_1001.JPG	2018-07-19 15:33:21	58.52355556	-135.93572778	214	Abundance	0	0	1	1	Good	LFT	2018-09-26	SO-2017.1	0
SO_C_20180719_A_1002.JPG	2018-07-19 15:33:22	58.52353611	-135.93489722	214	Abundance	0	0	1	1	Good	LFT	2018-09-26	SO-2017.1	0
SO_C_20180719_A_1003.JPG	2018-07-19 15:33:23	58.52351667	-135.93406667	213	Abundance	0	0	1	1	Good	LFT	2018-09-26	SO-2017.1	0
SO_C_20180719_A_1004.JPG	2018-07-19 15:33:24	58.52349722	-135.93323611	213	Abundance	0	0	1	0	Good	LFT	2018-09-26	SO-2017.1	0
SO_C_20180719_A_1005.JPG	2018-07-19 15:33:25	58.52347778	-135.93240278	213	Abundance	0	0	1	0	Good	LFT	2018-09-26	SO-2017.1	0
SO_C_20180719_A_1006.JPG	2018-07-19 15:33:26	58.52346111	-135.93156944	213	Abundance	0	0	1	0	Good	LFT	2018-09-26	SO-2017.1	0
SO_C_20180719_A_1007.JPG	2018-07-19 15:33:27	58.52345278	-135.93073611	213	Abundance	0	0	1	1	Good	LFT	2018-09-26	SO-2017.1	0
SO_C_20180719_A_1008.JPG	2018-07-19 15:33:28	58.52344444	-135.92990278	212	Abundance	0	0	0	1	Good	LFT	2018-09-26	SO-2017.1	0
SO_C_20180719_A_1009.JPG	2018-07-19 15:33:29	58.52344167	-135.92906667	212	Abundance	0	0	0	1	Good	LFT	2018-09-26	SO-2017.1	0
SO_C_20180719_A_1010.JPG	2018-07-19 15:33:30	58.52344444	-135.92823611	212	Abundance	0	0	0	1	Good	LFT	2018-09-26	SO-2017.1	0
SO_C_20180719_A_1011.JPG	2018-07-19 15:33:31	58.52345000	-135.92740000	212	Abundance	0	0	0	1	Good	LFT	2018-09-26	SO-2017.1	0
SO_C_20180719_A_1012.JPG	2018-07-19 15:33:32	58.52345833	-135.92656667	212	Abundance	0	0	0	1	Good	LFT	2018-09-26	SO-2017.1	0
SO_C_20180719_A_1013.JPG	2018-07-19 15:33:33	58.52347222	-135.92573056	212	Abundance	0	0	1	0	Good	LFT	2018-09-26	SO-2017.1	0
SO_C_20180719_A_1014.JPG	2018-07-19 15:33:34	58.52349167	-135.92489444	212	Abundance	0	0	1	0	Good	LFT	2018-09-26	SO-2017.1	0
SO_C_20180719_A_1015.JPG	2018-07-19 15:33:35	58.52351111	-135.92406111	213	Abundance	0	0	1	0	Good	LFT	2018-09-26	SO-2017.1	0
SO_C_20180719_A_1016.JPG	2018-07-19 15:33:36	58.52353611	-135.92322500	213	Abundance	0	0	1	0	Good	LFT	2018-09-26	SO-2017.1	0
SO_C_20180719_A_1017.JPG	2018-07-19 15:33:37	58.52356389	-135.92239167	213	Abundance	0	0	1	0	Good	LFT	2018-09-26	SO-2017.1	0
SO_C_20180719_A_1018.JPG	2018-07-19 15:33:38	58.52359167	-135.92155278	213	Abundance	0	0	1	0	Good	LFT	2018-09-26	SO-2017.1	0
SO_C_20180719_A_1019.JPG	2018-07-19 15:33:39	58.52362222	-135.92071667	213	Abundance	0	0	1	0	Good	LFT	2018-09-26	SO-2017.1	0
SO_C_20180719_A_1020.JPG	2018-07-19 15:33:40	58.52365278	-135.91988056	213	Abundance	0	0	1	0	Good	LFT	2018-09-26	SO-2017.1	0
SO_C_20180719_A_1021.JPG	2018-07-19 15:33:41	58.52368611	-135.91904444	214	Abundance	0	0	1	0	Good	LFT	2018-09-26	SO-2017.1	0
SO_C_20180719_A_1022.JPG	2018-07-19 15:33:42	58.52371944	-135.91820556	214	Abundance	0	0	1	0	Good	LFT	2018-09-26	SO-2017.1	0
SO_C_20180719_A_1023.JPG	2018-07-19 15:33:43	58.52375833	-135.91736667	214	Abundance	0	0	1	0	Good	LFT	2018-09-26	SO-2017.1	0
SO_C_20180719_A_1024.JPG	2018-07-19 15:33:44	58.52379167	-135.91652222	214	Abundance	0	0	1	0	Good	LFT	2018-09-26	SO-2017.1	0
SO_C_20180719_A_1025.JPG	2018-07-19 15:33:45	58.52382222	-135.91567500	214	Abundance	0	0	1	0	Good	LFT	2018-09-26	SO-2017.1	0
SO_C_20180719_A_1026.JPG	2018-07-19 15:33:46	58.52385000	-135.91482778	215	Abundance	0	0	1	0	Good	LFT	2018-09-26	SO-2017.1	0
SO_C_20180719_A_1027.JPG	2018-07-19 15:33:47	58.52387500	-135.91397778	215	Abundance	0	0	1	0	Good	LFT	2018-09-26	SO-2017.1	0
SO_C_20180719_A_1028.JPG	2018-07-19 15:33:48	58.52390278	-135.91312500	215	Abundance	0	0	0	0	Good	LFT	2018-09-26	SO-2017.1	0
SO_C_20180719_A_1029.JPG	2018-07-19 15:33:49	58.52392500	-135.91226944	215	Abundance	0	0	1	0	Good	LFT	2018-09-26	SO-2017.1	0
SO_C_20180719_A_1030.JPG	2018-07-19 15:33:50	58.52394444	-135.91141111	215	Abundance	0	0	1	0	Good	LFT	2018-09-26	SO-2017.1	0
SO_C_20180719_A_1031.JPG	2018-07-19 15:33:51	58.52396111	-135.91055000	215	Abundance	0	0	0	0	Good	LFT	2018-09-26	SO-2017.1	0
SO_C_20180719_A_1032.JPG	2018-07-19 15:33:52	58.52397222	-135.90968889	214	Abundance	0	0	1	0	Good	LFT	2018-09-26	SO-2017.1	0
SO_C_20180719_A_1033.JPG	2018-07-19 15:33:53	58.52397778	-135.90883056	214	Abundance	0	0	1	0	Good	LFT	2018-09-26	SO-2017.1	0
SO_C_20180719_A_1034.JPG	2018-07-19 15:33:54	58.52398056	-135.90797222	213	Abundance	0	0	1	0	Good	LFT	2018-09-26	SO-2017.1	0
SO_C_20180719_A_1035.JPG	2018-07-19 15:33:55	58.52398056	-135.90711944	212	Abundance	0	0	1	0	Good	LFT	2018-09-26	SO-2017.1	0
SO_C_20180719_A_1036.JPG	2018-07-19 15:33:56	58.52397778	-135.90626944	212	Abundance	0	0	1	0	Good	LFT	2018-09-26	SO-2017.1	0
SO_C_20180719_A_1037.JPG	2018-07-19 15:33:57	58.52397222	-135.90543056	211	Abundance	0	0	1	0	Good	LFT	2018-09-26	SO-2017.1	0
SO_C_20180719_A_1038.JPG	2018-07-19 15:33:58	58.52396944	-135.90459444	211	Abundance	0	0	0	0	Good	LFT	2018-09-26	SO-2017.1	0
SO_C_20180719_A_1039.JPG	2018-07-19 15:33:59	58.52396389	-135.90376667	211	Abundance	0	0	0	0	Good	LFT	2018-09-26	SO-2017.1	0
SO_C_20180719_A_1040.JPG	2018-07-19 15:34:00	58.52396111	-135.90293889	211	Abundance	0	0	1	0	Good	LFT	2018-09-26	SO-2017.1	0
SO_C_20180719_A_1041.JPG	2018-07-19 15:34:01	58.52395833	-135.90210000	212	Abundance	0	0	1	0	Good	LFT	2018-09-26	SO-2017.1	0
SO_C_20180719_A_1042.JPG	2018-07-19 15:34:02	58.52395556	-135.90126667	213	Abundance	0	0	1	0	Good	LFT	2018-09-26	SO-2017.1	0
SO_C_20180719_A_1043.JPG	2018-07-19 15:34:03	58.52395000	-135.90042778	214	Abundance	0	0	1	0	Good	LFT	2018-09-26	SO-2017.1	0
SO_C_20180719_A_1044.JPG	2018-07-19 15:34:04	58.52394444	-135.89958889	215	Abundance	0	0	1	0	Good	LFT	2018-09-26	SO-2017.1	0
SO_C_20180719_A_1045.JPG	2018-07-19 15:34:05	58.52393889	-135.89874444	215	Abundance	0	0	1	0	Good	LFT	2018-09-26	SO-2017.1	0
SO_C_20180719_A_1046.JPG	2018-07-19 15:34:06	58.52393333	-135.89790000	216	Abundance	0	0	1	0	Good	LFT	2018-09-26	SO-2017.1	0
SO_C_20180719_A_1047.JPG	2018-07-19 15:34:07	58.52392500	-135.89705000	216	Abundance	0	0	0	1	Good	LFT	2018-09-26	SO-2017.1	0
SO_C_20180719_A_1048.JPG	2018-07-19 15:34:08	58.52391944	-135.89620000	216	Abundance	0	0	1	1	Good	LFT	2018-09-26	SO-2017.1	0
SO_C_20180719_A_1049.JPG	2018-07-19 15:34:09	58.52391389	-135.89534722	216	Abundance	0	0	1	1	Good	LFT	2018-09-26	SO-2017.1	0
SO_C_20180719_A_1050.JPG	2018-07-19 15:34:10	58.52390833	-135.89449167	216	Abundance	0	0	0	1	Good	LFT	2018-09-26	SO-2017.1	0
SO_C_20180719_A_1051.JPG	2018-07-19 15:34:11	58.52390278	-135.89363333	216	Abundance	0	0	0	1	Good	LFT	2018-09-26	SO-2017.1	0
SO_C_20180719_A_1052.JPG	2018-07-19 15:34:12	58.52390000	-135.89277778	215	Abundance	0	0	0	1	Good	LFT	2018-09-26	SO-2017.1	0
SO_C_20180719_A_1053.JPG	2018-07-19 15:34:13	58.52389444	-135.89192500	215	Abundance	0	0	0	1	Good	LFT	2018-09-26	SO-2017.1	0
SO_C_20180719_A_1054.JPG	2018-07-19 15:34:14	58.52388611	-135.89107222	214	Abundance	0	0	1	1	Good	LFT	2018-09-26	SO-2017.1	0
SO_C_20180719_A_1055.JPG	2018-07-19 15:34:15	58.52387778	-135.89022222	214	Abundance	0	0	1	1	Good	LFT	2018-09-26	SO-2017.1	0
SO_C_20180719_A_1056.JPG	2018-07-19 15:34:16	58.52387222	-135.88937778	213	Abundance	0	0	1	1	Good	LFT	2018-09-26	SO-2017.1	0
SO_C_20180719_A_1057.JPG	2018-07-19 15:34:17	58.52386389	-135.88853333	213	Abundance	0	0	1	1	Good	LFT	2018-09-26	SO-2017.1	0
SO_C_20180719_A_1058.JPG	2018-07-19 15:34:18	58.52385833	-135.88769167	213	Abundance	0	0	1	0	Good	LFT	2018-09-26	SO-2017.1	0
SO_C_20180719_A_1059.JPG	2018-07-19 15:34:19	58.52385278	-135.88685278	213	Abundance	0	0	1	0	Good	LFT	2018-09-26	SO-2017.1	0
SO_C_20180719_A_1060.JPG	2018-07-19 15:34:20	58.52385000	-135.88601111	213	Abundance	0	0	1	1	Good	LFT	2018-09-26	SO-2017.1	0
SO_C_20180719_A_1061.JPG	2018-07-19 15:34:21	58.52385000	-135.88517222	213	Abundance	0	0	1	1	Good	LFT	2018-09-26	SO-2017.1	0
SO_C_20180719_A_1062.JPG	2018-07-19 15:34:22	58.52385000	-135.88433611	213	Abundance	0	0	1	1	Good	LFT	2018-09-26	SO-2017.1	0
SO_C_20180719_A_1063.JPG	2018-07-19 15:34:23	58.52385278	-135.88350000	213	Abundance	0	0	1	1	Good	LFT	2018-09-26	SO-2017.1	0
SO_C_20180719_A_1064.JPG	2018-07-19 15:34:24	58.52385833	-135.88266667	213	Abundance	0	0	1	1	Good	LFT	2018-09-26	SO-2017.1	0
SO_C_20180719_A_1065.JPG	2018-07-19 15:34:25	58.52386944	-135.88183056	213	Abundance	0	0	1	1	Good	LFT	2018-09-26	SO-2017.1	0
SO_C_20180719_A_1066.JPG	2018-07-19 15:36:08	58.52768611	-135.86724167	209	Abundance	0	0	1	0	Good	LFT	2018-09-26	SO-2017.1	0
SO_C_20180719_A_1067.JPG	2018-07-19 15:36:09	58.52770833	-135.86798056	209	Abundance	0	0	1	0	Good	LFT	2018-09-26	SO-2017.1	0
SO_C_20180719_A_1068.JPG	2018-07-19 15:36:10	58.52773333	-135.86871667	209	Abundance	0	0	1	0	Good	LFT	2018-09-26	SO-2017.1	0
SO_C_20180719_A_1069.JPG	2018-07-19 15:36:11	58.52775833	-135.86944444	210	Abundance	0	0	1	0	Good	LFT	2018-09-26	SO-2017.1	0
SO_C_20180719_A_1070.JPG	2018-07-19 15:36:12	58.52778056	-135.87017222	211	Abundance	0	0	1	0	Good	LFT	2018-09-26	SO-2017.1	0
SO_C_20180719_A_1071.JPG	2018-07-19 15:36:13	58.52780000	-135.87089444	212	Abundance	0	0	1	0	Good	LFT	2018-09-26	SO-2017.1	0
SO_C_20180719_A_1072.JPG	2018-07-19 15:36:14	58.52782222	-135.87161667	213	Abundance	0	0	1	1	Good	LFT	2018-09-26	SO-2017.1	0
SO_C_20180719_A_1073.JPG	2018-07-19 15:36:15	58.52784167	-135.87233889	214	Abundance	0	0	1	1	Good	LFT	2018-09-26	SO-2017.1	0
SO_C_20180719_A_1074.JPG	2018-07-19 15:36:16	58.52785556	-135.87306111	214	Abundance	0	0	1	1	Good	LFT	2018-09-26	SO-2017.1	0
SO_C_20180719_A_1075.JPG	2018-07-19 15:36:17	58.52786944	-135.87378056	215	Abundance	0	0	1	1	Good	LFT	2018-09-26	SO-2017.1	0
SO_C_20180719_A_1076.JPG	2018-07-19 15:36:18	58.52788056	-135.87450833	216	Abundance	0	0	0	1	Good	LFT	2018-09-26	SO-2017.1	0
SO_C_20180719_A_1077.JPG	2018-07-19 15:36:19	58.52788611	-135.87524444	217	Abundance	0	0	0	1	Good	LFT	2018-09-26	SO-2017.1	0
SO_C_20180719_A_1078.JPG	2018-07-19 15:36:20	58.52789444	-135.87598056	217	Abundance	0	0	1	1	Good	LFT	2018-09-26	SO-2017.1	0
SO_C_20180719_A_1079.JPG	2018-07-19 15:36:21	58.52789722	-135.87672222	218	Abundance	0	0	1	1	Good	LFT	2018-09-26	SO-2017.1	0
SO_C_20180719_A_1080.JPG	2018-07-19 15:36:22	58.52789444	-135.87746667	218	Abundance	0	0	1	1	Good	LFT	2018-09-26	SO-2017.1	0
SO_C_20180719_A_1081.JPG	2018-07-19 15:36:23	58.52788611	-135.87821111	217	Abundance	0	0	1	0	Good	LFT	2018-09-26	SO-2017.1	0
SO_C_20180719_A_1082.JPG	2018-07-19 15:36:24	58.52787778	-135.87896111	217	Abundance	0	0	1	1	Good	LFT	2018-09-26	SO-2017.1	0
SO_C_20180719_A_1083.JPG	2018-07-19 15:36:25	58.52786111	-135.87971667	217	Abundance	0	0	0	1	Good	LFT	2018-09-26	SO-2017.1	0
SO_C_20180719_A_1084.JPG	2018-07-19 15:36:26	58.52784167	-135.88047222	217	Abundance	0	0	0	1	Good	LFT	2018-09-26	SO-2017.1	0
SO_C_20180719_A_1085.JPG	2018-07-19 15:36:27	58.52781389	-135.88123056	216	Abundance	0	0	0	1	Good	LFT	2018-09-26	SO-2017.1	0
SO_C_20180719_A_1086.JPG	2018-07-19 15:36:28	58.52778333	-135.88199167	216	Abundance	0	0	0	1	Good	LFT	2018-09-26	SO-2017.1	0
SO_C_20180719_A_1087.JPG	2018-07-19 15:36:29	58.52774444	-135.88274722	216	Abundance	0	0	1	1	Good	LFT	2018-09-26	SO-2017.1	0
SO_C_20180719_A_1088.JPG	2018-07-19 15:36:30	58.52770556	-135.88350556	216	Abundance	0	0	0	1	Good	LFT	2018-09-26	SO-2017.1	0
SO_C_20180719_A_1089.JPG	2018-07-19 15:36:31	58.52766667	-135.88426389	215	Abundance	0	0	0	1	Good	LFT	2018-09-26	SO-2017.1	0
SO_C_20180719_A_1090.JPG	2018-07-19 15:36:32	58.52763333	-135.88502500	215	Abundance	0	0	0	1	Good	LFT	2018-09-26	SO-2017.1	0
SO_C_20180719_A_1091.JPG	2018-07-19 15:36:33	58.52760278	-135.88578333	215	Abundance	0	0	0	1	Good	LFT	2018-09-26	SO-2017.1	0
SO_C_20180719_A_1092.JPG	2018-07-19 15:36:34	58.52757500	-135.88654444	215	Abundance	0	0	0	1	Good	LFT	2018-09-26	SO-2017.1	0
SO_C_20180719_A_1093.JPG	2018-07-19 15:36:35	58.52754722	-135.88730278	215	Abundance	0	0	0	1	Good	LFT	2018-09-26	SO-2017.1	0
SO_C_20180719_A_1094.JPG	2018-07-19 15:36:36	58.52752222	-135.88805556	214	Abundance	0	0	0	1	Good	LFT	2018-09-26	SO-2017.1	0
SO_C_20180719_A_1095.JPG	2018-07-19 15:36:37	58.52750000	-135.88881389	214	Abundance	0	0	0	1	Good	LFT	2018-09-26	SO-2017.1	0
SO_C_20180719_A_1096.JPG	2018-07-19 15:36:38	58.52748333	-135.88957500	215	Abundance	0	0	0	1	Good	LFT	2018-09-26	SO-2017.1	0
SO_C_20180719_A_1097.JPG	2018-07-19 15:36:39	58.52747222	-135.89033889	215	Abundance	0	0	0	1	Good	LFT	2018-09-26	SO-2017.1	0
SO_C_20180719_A_1098.JPG	2018-07-19 15:36:40	58.52746389	-135.89110556	215	Abundance	0	0	0	1	Good	LFT	2018-09-26	SO-2017.1	0
SO_C_20180719_A_1099.JPG	2018-07-19 15:36:41	58.52746111	-135.89187500	216	Abundance	0	0	0	1	Good	LFT	2018-09-26	SO-2017.1	0
SO_C_20180719_A_1100.JPG	2018-07-19 15:36:42	58.52746111	-135.89264444	216	Abundance	0	0	0	1	Good	LFT	2018-09-26	SO-2017.1	0
SO_C_20180719_A_1101.JPG	2018-07-19 15:36:43	58.52746667	-135.89341389	216	Abundance	0	0	0	1	Good	LFT	2018-09-26	SO-2017.1	0
SO_C_20180719_A_1102.JPG	2018-07-19 15:36:44	58.52747222	-135.89418889	216	Abundance	0	0	0	1	Good	LFT	2018-09-26	SO-2017.1	0
SO_C_20180719_A_1103.JPG	2018-07-19 15:36:45	58.52748056	-135.89496389	216	Abundance	0	0	0	1	Good	LFT	2018-09-26	SO-2017.1	0
SO_C_20180719_A_1104.JPG	2018-07-19 15:36:46	58.52748611	-135.89574167	216	Abundance	0	0	0	1	Good	LFT	2018-09-26	SO-2017.1	0
SO_C_20180719_A_1105.JPG	2018-07-19 15:36:47	58.52748889	-135.89652222	216	Abundance	0	0	0	1	Good	LFT	2018-09-26	SO-2017.1	0
SO_C_20180719_A_1106.JPG	2018-07-19 15:36:48	58.52749167	-135.89730000	216	Abundance	0	0	0	1	Good	LFT	2018-09-26	SO-2017.1	0
SO_C_20180719_A_1107.JPG	2018-07-19 15:36:49	58.52749167	-135.89807500	216	Abundance	0	0	1	0	Good	LFT	2018-09-26	SO-2017.1	0
SO_C_20180719_A_1108.JPG	2018-07-19 15:36:50	58.52748889	-135.89885000	216	Abundance	0	0	1	0	Good	LFT	2018-09-26	SO-2017.1	0
SO_C_20180719_A_1109.JPG	2018-07-19 15:36:51	58.52748889	-135.89962778	217	Abundance	0	0	1	0	Good	LFT	2018-09-26	SO-2017.1	0
SO_C_20180719_A_1110.JPG	2018-07-19 15:36:52	58.52748889	-135.90040833	217	Abundance	0	0	1	0	Good	LFT	2018-09-26	SO-2017.1	0
SO_C_20180719_A_1111.JPG	2018-07-19 15:36:53	58.52748889	-135.90119167	217	Abundance	0	0	1	0	Good	LFT	2018-09-26	SO-2017.1	0
SO_C_20180719_A_1112.JPG	2018-07-19 15:36:54	58.52748611	-135.90197500	217	Abundance	0	0	0	0	Good	LFT	2018-09-26	SO-2017.1	0
SO_C_20180719_A_1113.JPG	2018-07-19 15:36:55	58.52748056	-135.90276111	218	Abundance	0	0	1	0	Good	LFT	2018-09-26	SO-2017.1	0
SO_C_20180719_A_1114.JPG	2018-07-19 15:36:56	58.52747222	-135.90355278	218	Abundance	0	0	1	0	Good	LFT	2018-09-26	SO-2017.1	0
SO_C_20180719_A_1115.JPG	2018-07-19 15:36:57	58.52746111	-135.90434444	218	Abundance	0	0	1	0	Good	LFT	2018-09-26	SO-2017.1	0
SO_C_20180719_A_1116.JPG	2018-07-19 15:36:58	58.52744444	-135.90513333	219	Abundance	0	0	1	0	Good	LFT	2018-09-26	SO-2017.1	0
SO_C_20180719_A_1117.JPG	2018-07-19 15:36:59	58.52742778	-135.90592500	219	Abundance	0	0	0	0	Good	LFT	2018-09-26	SO-2017.1	0
SO_C_20180719_A_1118.JPG	2018-07-19 15:37:00	58.52741111	-135.90672222	219	Abundance	0	0	1	0	Good	LFT	2018-09-26	SO-2017.1	0
SO_C_20180719_A_1119.JPG	2018-07-19 15:37:01	58.52739444	-135.90751667	219	Abundance	0	0	0	0	Good	LFT	2018-09-26	SO-2017.1	0
SO_C_20180719_A_1120.JPG	2018-07-19 15:37:02	58.52738056	-135.90831111	219	Abundance	0	0	0	0	Good	LFT	2018-09-26	SO-2017.1	0
SO_C_20180719_A_1121.JPG	2018-07-19 15:37:03	58.52736389	-135.90909722	219	Abundance	0	0	0	0	Good	LFT	2018-09-26	SO-2017.1	0
SO_C_20180719_A_1122.JPG	2018-07-19 15:37:04	58.52735000	-135.90988056	219	Abundance	0	0	1	0	Good	LFT	2018-09-26	SO-2017.1	0
SO_C_20180719_A_1123.JPG	2018-07-19 15:37:05	58.52733889	-135.91066389	220	Abundance	0	0	0	0	Good	LFT	2018-09-26	SO-2017.1	0
SO_C_20180719_A_1124.JPG	2018-07-19 15:37:06	58.52732778	-135.91145000	220	Abundance	0	0	0	0	Good	LFT	2018-09-26	SO-2017.1	0
SO_C_20180719_A_1125.JPG	2018-07-19 15:37:07	58.52731944	-135.91223889	220	Abundance	0	0	1	0	Good	LFT	2018-09-26	SO-2017.1	0
SO_C_20180719_A_1126.JPG	2018-07-19 15:37:08	58.52731111	-135.91303056	220	Abundance	0	0	1	0	Good	LFT	2018-09-26	SO-2017.1	0
SO_C_20180719_A_1127.JPG	2018-07-19 15:37:09	58.52730556	-135.91382500	220	Abundance	0	0	1	0	Good	LFT	2018-09-26	SO-2017.1	0
SO_C_20180719_A_1128.JPG	2018-07-19 15:37:10	58.52730556	-135.91462222	220	Abundance	0	0	0	0	Good	LFT	2018-09-26	SO-2017.1	0
SO_C_20180719_A_1129.JPG	2018-07-19 15:37:11	58.52730833	-135.91541944	220	Abundance	0	0	0	0	Good	LFT	2018-09-26	SO-2017.1	0
SO_C_20180719_A_1130.JPG	2018-07-19 15:37:12	58.52731111	-135.91621111	220	Abundance	0	0	0	0	Good	LFT	2018-09-26	SO-2017.1	0
SO_C_20180719_A_1131.JPG	2018-07-19 15:37:13	58.52731667	-135.91700278	220	Abundance	0	0	0	0	Good	LFT	2018-09-26	SO-2017.1	0
SO_C_20180719_A_1132.JPG	2018-07-19 15:37:14	58.52731667	-135.91779444	220	Abundance	0	0	0	0	Good	LFT	2018-09-26	SO-2017.1	0
SO_C_20180719_A_1133.JPG	2018-07-19 15:37:15	58.52731667	-135.91858333	220	Abundance	0	0	0	0	Good	LFT	2018-09-26	SO-2017.1	0
SO_C_20180719_A_1134.JPG	2018-07-19 15:37:16	58.52731389	-135.91937222	220	Abundance	0	0	1	0	Good	LFT	2018-09-26	SO-2017.1	0
SO_C_20180719_A_1135.JPG	2018-07-19 15:37:17	58.52731389	-135.92016111	220	Abundance	0	0	1	0	Good	LFT	2018-09-26	SO-2017.1	0
SO_C_20180719_A_1136.JPG	2018-07-19 15:37:18	58.52731389	-135.92095278	221	Abundance	0	0	0	0	Good	LFT	2018-09-26	SO-2017.1	0
SO_C_20180719_A_1137.JPG	2018-07-19 15:37:19	58.52731944	-135.92174444	221	Abundance	0	0	0	0	Good	LFT	2018-09-26	SO-2017.1	0
SO_C_20180719_A_1138.JPG	2018-07-19 15:37:20	58.52732222	-135.92254167	222	Abundance	0	0	1	0	Good	LFT	2018-09-26	SO-2017.1	0
SO_C_20180719_A_1139.JPG	2018-07-19 15:37:21	58.52732500	-135.92333889	223	Abundance	0	0	1	0	Good	LFT	2018-09-26	SO-2017.1	0
SO_C_20180719_A_1140.JPG	2018-07-19 15:37:22	58.52732778	-135.92413611	223	Abundance	0	0	0	0	Good	LFT	2018-09-26	SO-2017.1	0
SO_C_20180719_A_1141.JPG	2018-07-19 15:37:23	58.52732778	-135.92493333	223	Abundance	0	0	0	0	Good	LFT	2018-09-26	SO-2017.1	0
SO_C_20180719_A_1142.JPG	2018-07-19 15:37:24	58.52732500	-135.92572778	223	Abundance	0	0	0	0	Good	LFT	2018-09-26	SO-2017.1	0
SO_C_20180719_A_1143.JPG	2018-07-19 15:37:25	58.52731667	-135.92652500	224	Abundance	0	0	0	0	Good	LFT	2018-09-26	SO-2017.1	0
SO_C_20180719_A_1144.JPG	2018-07-19 15:37:26	58.52730278	-135.92732778	224	Abundance	0	0	1	0	Good	LFT	2018-09-26	SO-2017.1	0
SO_C_20180719_A_1145.JPG	2018-07-19 15:37:27	58.52729167	-135.92812778	224	Abundance	0	0	1	0	Good	LFT	2018-09-26	SO-2017.1	0
SO_C_20180719_A_1146.JPG	2018-07-19 15:37:28	58.52727222	-135.92893333	224	Abundance	0	0	1	1	Good	LFT	2018-09-26	SO-2017.1	0
SO_C_20180719_A_1147.JPG	2018-07-19 15:37:29	58.52725556	-135.92973333	225	Abundance	0	0	1	1	Good	LFT	2018-09-26	SO-2017.1	0
SO_C_20180719_A_1148.JPG	2018-07-19 15:37:30	58.52724167	-135.93053333	225	Abundance	0	0	1	1	Good	LFT	2018-09-26	SO-2017.1	0
SO_C_20180719_A_1149.JPG	2018-07-19 15:37:31	58.52722778	-135.93133333	225	Abundance	0	0	1	1	Good	LFT	2018-09-26	SO-2017.1	0
SO_C_20180719_A_1150.JPG	2018-07-19 15:37:32	58.52720833	-135.93213889	225	Abundance	0	0	0	1	Good	LFT	2018-09-26	SO-2017.1	0
SO_C_20180719_A_1151.JPG	2018-07-19 15:37:33	58.52718889	-135.93294444	225	Abundance	0	0	1	1	Good	LFT	2018-09-26	SO-2017.1	0
SO_C_20180719_A_1152.JPG	2018-07-19 15:37:34	58.52717222	-135.93374722	225	Abundance	0	0	1	1	Good	LFT	2018-09-26	SO-2017.1	0
SO_C_20180719_A_1153.JPG	2018-07-19 15:37:35	58.52714722	-135.93455833	225	Abundance	0	0	1	1	Good	LFT	2018-09-26	SO-2017.1	0
SO_C_20180719_A_1154.JPG	2018-07-19 15:37:36	58.52712500	-135.93537500	225	Abundance	0	0	0	1	Good	LFT	2018-09-26	SO-2017.1	0
SO_C_20180719_A_1155.JPG	2018-07-19 15:37:37	58.52710556	-135.93619444	225	Abundance	0	0	1	0	Good	LFT	2018-09-26	SO-2017.1	0
SO_C_20180719_A_1156.JPG	2018-07-19 15:37:38	58.52708611	-135.93701667	225	Abundance	0	0	1	0	Good	LFT	2018-09-26	SO-2017.1	0
SO_C_20180719_A_1157.JPG	2018-07-19 15:37:39	58.52706667	-135.93784444	225	Abundance	0	0	0	0	Good	LFT	2018-09-26	SO-2017.1	0
SO_C_20180719_A_1158.JPG	2018-07-19 15:37:40	58.52705000	-135.93867778	224	Abundance	0	0	1	0	Good	LFT	2018-09-26	SO-2017.1	0
SO_C_20180719_A_1159.JPG	2018-07-19 15:37:41	58.52703611	-135.93951111	223	Abundance	0	0	1	0	Good	LFT	2018-09-26	SO-2017.1	0
SO_C_20180719_A_1160.JPG	2018-07-19 15:37:42	58.52702222	-135.94034167	222	Abundance	0	0	1	0	Good	LFT	2018-09-26	SO-2017.1	0
SO_C_20180719_A_1161.JPG	2018-07-19 15:37:43	58.52701389	-135.94116667	221	Abundance	0	0	1	0	Good	LFT	2018-09-26	SO-2017.1	0
SO_C_20180719_A_1162.JPG	2018-07-19 15:37:44	58.52700556	-135.94198611	220	Abundance	0	0	1	0	Good	LFT	2018-09-26	SO-2017.1	0
SO_C_20180719_A_1163.JPG	2018-07-19 15:37:45	58.52700278	-135.94280833	219	Abundance	0	0	1	0	Good	LFT	2018-09-26	SO-2017.1	0
SO_C_20180719_A_1164.JPG	2018-07-19 15:37:46	58.52700000	-135.94362500	218	Abundance	0	0	1	0	Good	LFT	2018-09-26	SO-2017.1	0
SO_C_20180719_A_1165.JPG	2018-07-19 15:37:47	58.52700000	-135.94443333	218	Abundance	0	0	1	0	Good	LFT	2018-09-26	SO-2017.1	0
SO_C_20180719_A_1166.JPG	2018-07-19 15:37:48	58.52700000	-135.94523333	218	Abundance	1	0	1	1	Good	LFT	2018-09-26	SO-2017.1	0
SO_C_20180719_A_1167.JPG	2018-07-19 15:37:49	58.52700278	-135.94603611	219	Abundance	1	0	1	1	Good	LFT	2018-09-26	SO-2017.1	0
SO_C_20180719_A_1168.JPG	2018-07-19 15:37:50	58.52700833	-135.94684167	219	Abundance	0	0	0	1	Good	LFT	2018-09-26	SO-2017.1	0
SO_C_20180719_A_1169.JPG	2018-07-19 15:37:51	58.52701667	-135.94764444	220	Abundance	0	0	0	1	Good	LFT	2018-09-26	SO-2017.1	0
SO_C_20180719_A_1170.JPG	2018-07-19 15:37:52	58.52703056	-135.94845000	221	Abundance	0	0	0	1	Good	LFT	2018-09-26	SO-2017.1	0
SO_C_20180719_A_1171.JPG	2018-07-19 15:37:53	58.52704167	-135.94925833	221	Abundance	0	0	0	1	Good	LFT	2018-09-26	SO-2017.1	0
SO_C_20180719_A_1172.JPG	2018-07-19 15:37:54	58.52705556	-135.95007500	221	Abundance	0	0	0	1	Good	LFT	2018-09-26	SO-2017.1	0
SO_C_20180719_A_1173.JPG	2018-07-19 15:37:55	58.52706667	-135.95089167	222	Abundance	0	0	0	1	Good	LFT	2018-09-26	SO-2017.1	0
SO_C_20180719_A_1174.JPG	2018-07-19 15:37:56	58.52708056	-135.95171389	222	Abundance	0	0	0	1	Good	LFT	2018-09-26	SO-2017.1	0
SO_C_20180719_A_1175.JPG	2018-07-19 15:37:57	58.52709444	-135.95253611	222	Abundance	0	0	0	1	Good	LFT	2018-09-26	SO-2017.1	0
SO_C_20180719_A_1176.JPG	2018-07-19 15:37:58	58.52710556	-135.95336389	221	Abundance	0	0	0	1	Good	LFT	2018-09-26	SO-2017.1	0
SO_C_20180719_A_1177.JPG	2018-07-19 15:37:59	58.52711667	-135.95418889	221	Abundance	0	0	0	1	Good	LFT	2018-09-26	SO-2017.1	0
SO_C_20180719_A_1178.JPG	2018-07-19 15:38:00	58.52712500	-135.95501667	220	Abundance	0	0	0	1	Good	LFT	2018-09-26	SO-2017.1	0
SO_C_20180719_A_1179.JPG	2018-07-19 15:38:01	58.52713056	-135.95584722	220	Abundance	0	0	1	1	Good	LFT	2018-09-26	SO-2017.1	0
SO_C_20180719_A_1180.JPG	2018-07-19 15:38:02	58.52713611	-135.95667778	220	Abundance	0	0	1	1	Good	LFT	2018-09-26	SO-2017.1	0
SO_C_20180719_A_1181.JPG	2018-07-19 15:38:03	58.52713889	-135.95750556	219	Abundance	0	0	1	1	Good	LFT	2018-09-26	SO-2017.1	0
SO_C_20180719_A_1182.JPG	2018-07-19 15:38:04	58.52713889	-135.95833333	219	Abundance	0	0	1	1	Good	LFT	2018-09-26	SO-2017.1	0
SO_C_20180719_A_1183.JPG	2018-07-19 15:38:05	58.52713611	-135.95916111	219	Abundance	0	0	1	1	Good	LFT	2018-09-26	SO-2017.1	0
SO_C_20180719_A_1184.JPG	2018-07-19 15:38:06	58.52713333	-135.95998333	219	Abundance	0	0	1	0	Good	LFT	2018-09-26	SO-2017.1	0
SO_C_20180719_A_1185.JPG	2018-07-19 15:38:07	58.52713056	-135.96080278	219	Abundance	0	0	1	0	Good	LFT	2018-09-26	SO-2017.1	0
SO_C_20180719_A_1186.JPG	2018-07-19 15:38:08	58.52712500	-135.96161944	219	Abundance	0	0	0	0	Good	LFT	2018-09-26	SO-2017.1	0
SO_C_20180719_A_1187.JPG	2018-07-19 15:38:09	58.52711944	-135.96243333	219	Abundance	0	0	0	0	Good	LFT	2018-09-26	SO-2017.1	0
SO_C_20180719_A_1188.JPG	2018-07-19 15:38:10	58.52711111	-135.96324167	219	Abundance	0	0	0	0	Good	LFT	2018-09-26	SO-2017.1	0
SO_C_20180719_A_1189.JPG	2018-07-19 15:38:11	58.52710556	-135.96404722	219	Abundance	0	0	0	0	Good	LFT	2018-09-26	SO-2017.1	0
SO_C_20180719_A_1190.JPG	2018-07-19 15:38:12	58.52709722	-135.96485278	219	Abundance	0	0	0	0	Good	LFT	2018-09-26	SO-2017.1	0
SO_C_20180719_A_1191.JPG	2018-07-19 15:38:13	58.52708889	-135.96565278	220	Abundance	1	0	0	0	Good	LFT	2018-09-26	SO-2017.1	0
SO_C_20180719_A_1192.JPG	2018-07-19 15:38:14	58.52708056	-135.96645556	220	Abundance	0	0	1	0	Good	LFT	2018-09-26	SO-2017.1	0
SO_C_20180719_A_1193.JPG	2018-07-19 15:38:15	58.52706667	-135.96726111	221	Abundance	0	0	0	0	Good	LFT	2018-09-26	SO-2017.1	0
SO_C_20180719_A_1194.JPG	2018-07-19 15:38:16	58.52705278	-135.96806944	222	Abundance	0	0	0	0	Good	LFT	2018-09-26	SO-2017.1	0
SO_C_20180719_A_1195.JPG	2018-07-19 15:38:17	58.52703611	-135.96888056	222	Abundance	0	0	0	0	Good	LFT	2018-09-26	SO-2017.1	0
SO_C_20180719_A_1196.JPG	2018-07-19 15:38:18	58.52701944	-135.96969722	223	Abundance	0	0	1	0	Good	LFT	2018-09-26	SO-2017.1	0
SO_C_20180719_A_1197.JPG	2018-07-19 15:38:19	58.52700000	-135.97052500	223	Abundance	0	0	1	0	Good	LFT	2018-09-26	SO-2017.1	0
SO_C_20180719_A_1198.JPG	2018-07-19 15:38:20	58.52698333	-135.97135000	223	Abundance	0	0	0	0	Good	LFT	2018-09-26	SO-2017.1	0
SO_C_20180719_A_1199.JPG	2018-07-19 15:38:21	58.52696667	-135.97218333	223	Abundance	0	0	0	0	Good	LFT	2018-09-26	SO-2017.1	0
SO_C_20180719_A_1200.JPG	2018-07-19 15:38:22	58.52695000	-135.97302222	223	Abundance	0	0	0	0	Good	LFT	2018-09-26	SO-2017.1	0
SO_C_20180719_A_1201.JPG	2018-07-19 15:38:23	58.52693056	-135.97386389	223	Abundance	0	0	0	0	Good	LFT	2018-09-26	SO-2017.1	0
SO_C_20180719_A_1202.JPG	2018-07-19 15:38:24	58.52691389	-135.97471389	222	Abundance	0	0	0	0	Good	LFT	2018-09-26	SO-2017.1	0
SO_C_20180719_A_1203.JPG	2018-07-19 15:40:16	58.50941389	-136.01968889	202	Abundance	0	0	0	1	Good	LFT	2018-09-26	SO-2017.1	0
SO_C_20180719_A_1204.JPG	2018-07-19 15:40:17	58.50952778	-136.01896111	204	Abundance	0	0	0	1	Good	LFT	2018-09-26	SO-2017.1	0
SO_C_20180719_A_1205.JPG	2018-07-19 15:40:18	58.50964444	-136.01823611	206	Abundance	0	0	0	1	Good	LFT	2018-09-26	SO-2017.1	0
SO_C_20180719_A_1206.JPG	2018-07-19 15:40:19	58.50976389	-136.01750833	208	Abundance	0	0	0	1	Good	LFT	2018-09-26	SO-2017.1	0
SO_C_20180719_A_1207.JPG	2018-07-19 15:40:20	58.50989167	-136.01678611	209	Abundance	0	0	0	1	Good	LFT	2018-09-26	SO-2017.1	0
SO_C_20180719_A_1208.JPG	2018-07-19 15:40:21	58.51002222	-136.01606944	211	Abundance	0	0	0	1	Good	LFT	2018-09-26	SO-2017.1	0
SO_C_20180719_A_1209.JPG	2018-07-19 15:40:22	58.51015278	-136.01535278	212	Abundance	0	0	0	1	Good	LFT	2018-09-26	SO-2017.1	0
SO_C_20180719_A_1210.JPG	2018-07-19 15:40:23	58.51028611	-136.01463333	213	Abundance	0	0	0	1	Good	LFT	2018-09-26	SO-2017.1	0
SO_C_20180719_A_1211.JPG	2018-07-19 15:40:24	58.51041389	-136.01391389	215	Abundance	0	0	0	1	Good	LFT	2018-09-26	SO-2017.1	0
SO_C_20180719_A_1212.JPG	2018-07-19 15:40:25	58.51053889	-136.01319167	216	Abundance	0	0	0	1	Good	LFT	2018-09-26	SO-2017.1	0
SO_C_20180719_A_1213.JPG	2018-07-19 15:40:26	58.51066389	-136.01246667	217	Abundance	0	0	0	1	Good	LFT	2018-09-26	SO-2017.1	0
SO_C_20180719_A_1214.JPG	2018-07-19 15:40:27	58.51078889	-136.01174167	218	Abundance	0	0	0	1	Good	LFT	2018-09-26	SO-2017.1	0
SO_C_20180719_A_1215.JPG	2018-07-19 15:40:28	58.51091389	-136.01101667	219	Abundance	0	0	0	1	Good	LFT	2018-09-26	SO-2017.1	0
SO_C_20180719_A_1216.JPG	2018-07-19 15:40:29	58.51104167	-136.01028889	219	Abundance	0	0	0	1	Good	LFT	2018-09-26	SO-2017.1	0
SO_C_20180719_A_1217.JPG	2018-07-19 15:40:30	58.51116944	-136.00956111	220	Abundance	0	0	0	1	Good	LFT	2018-09-26	SO-2017.1	0
SO_C_20180719_A_1218.JPG	2018-07-19 15:40:31	58.51130000	-136.00883056	221	Abundance	0	0	0	1	Good	LFT	2018-09-26	SO-2017.1	0
SO_C_20180719_A_1219.JPG	2018-07-19 15:40:32	58.51142778	-136.00809722	221	Abundance	0	0	0	1	Good	LFT	2018-09-26	SO-2017.1	0
SO_C_20180719_A_1220.JPG	2018-07-19 15:40:33	58.51155000	-136.00736111	222	Abundance	0	0	0	1	Good	LFT	2018-09-26	SO-2017.1	0
SO_C_20180719_A_1221.JPG	2018-07-19 15:40:34	58.51167222	-136.00662222	222	Abundance	0	0	0	1	Good	LFT	2018-09-26	SO-2017.1	0
SO_C_20180719_A_1222.JPG	2018-07-19 15:40:35	58.51178611	-136.00587500	223	Abundance	0	0	0	1	Good	LFT	2018-09-26	SO-2017.1	0
SO_C_20180719_A_1223.JPG	2018-07-19 15:40:36	58.51190000	-136.00511944	223	Abundance	0	0	0	1	Good	LFT	2018-09-26	SO-2017.1	0
SO_C_20180719_A_1224.JPG	2018-07-19 15:40:37	58.51201111	-136.00435833	224	Abundance	0	0	0	1	Good	LFT	2018-09-26	SO-2017.1	0
SO_C_20180719_A_1225.JPG	2018-07-19 15:40:38	58.51212222	-136.00359167	224	Abundance	0	0	0	1	Good	LFT	2018-09-26	SO-2017.1	0
SO_C_20180719_A_1226.JPG	2018-07-19 15:40:39	58.51223333	-136.00281944	224	Abundance	0	0	0	1	Good	LFT	2018-09-26	SO-2017.1	0
SO_C_20180719_A_1227.JPG	2018-07-19 15:40:40	58.51234444	-136.00203889	224	Abundance	0	0	0	1	Good	LFT	2018-09-26	SO-2017.1	0
SO_C_20180719_A_1228.JPG	2018-07-19 15:40:41	58.51245278	-136.00125556	224	Abundance	0	0	0	1	Good	LFT	2018-09-26	SO-2017.1	0
SO_C_20180719_A_1229.JPG	2018-07-19 15:40:42	58.51256111	-136.00046389	223	Abundance	0	0	0	1	Good	LFT	2018-09-26	SO-2017.1	0
SO_C_20180719_A_1230.JPG	2018-07-19 15:40:43	58.51266389	-135.99966389	223	Abundance	0	0	0	1	Good	LFT	2018-09-26	SO-2017.1	0
SO_C_20180719_A_1231.JPG	2018-07-19 15:40:44	58.51276389	-135.99886111	222	Abundance	0	0	0	1	Good	LFT	2018-09-26	SO-2017.1	0
SO_C_20180719_A_1232.JPG	2018-07-19 15:40:45	58.51286111	-135.99805000	221	Abundance	0	0	0	1	Good	LFT	2018-09-26	SO-2017.1	0
SO_C_20180719_A_1233.JPG	2018-07-19 15:40:46	58.51295833	-135.99723889	220	Abundance	0	0	1	0	Good	LFT	2018-09-26	SO-2017.1	0
SO_C_20180719_A_1234.JPG	2018-07-19 15:40:47	58.51305556	-135.99642222	220	Abundance	0	0	1	0	Good	LFT	2018-09-26	SO-2017.1	0
SO_C_20180719_A_1235.JPG	2018-07-19 15:40:48	58.51315278	-135.99560833	219	Abundance	0	0	0	0	Good	LFT	2018-09-26	SO-2017.1	0
SO_C_20180719_A_1236.JPG	2018-07-19 15:40:49	58.51325000	-135.99479167	218	Abundance	0	0	0	0	Good	LFT	2018-09-26	SO-2017.1	0
SO_C_20180719_A_1237.JPG	2018-07-19 15:40:50	58.51335000	-135.99397778	217	Abundance	0	0	0	0	Good	LFT	2018-09-26	SO-2017.1	0
SO_C_20180719_A_1238.JPG	2018-07-19 15:40:51	58.51345278	-135.99316667	216	Abundance	0	0	0	0	Good	LFT	2018-09-26	SO-2017.1	0
SO_C_20180719_A_1239.JPG	2018-07-19 15:40:52	58.51355556	-135.99235833	215	Abundance	0	0	0	0	Good	LFT	2018-09-26	SO-2017.1	0
SO_C_20180719_A_1240.JPG	2018-07-19 15:40:53	58.51366111	-135.99155000	214	Abundance	0	0	0	0	Good	LFT	2018-09-26	SO-2017.1	0
SO_C_20180719_A_1241.JPG	2018-07-19 15:40:54	58.51377222	-135.99075000	214	Abundance	0	0	0	0	Good	LFT	2018-09-26	SO-2017.1	0
SO_C_20180719_A_1242.JPG	2018-07-19 15:40:55	58.51388611	-135.98995556	214	Abundance	0	0	0	0	Good	LFT	2018-09-26	SO-2017.1	0
SO_C_20180719_A_1243.JPG	2018-07-19 15:40:56	58.51400278	-135.98916389	213	Abundance	0	0	0	0	Good	LFT	2018-09-26	SO-2017.1	0
SO_C_20180719_A_1244.JPG	2018-07-19 15:40:57	58.51412222	-135.98837778	213	Abundance	0	0	0	0	Good	LFT	2018-09-26	SO-2017.1	0
SO_C_20180719_A_1245.JPG	2018-07-19 15:40:58	58.51424444	-135.98759444	213	Abundance	0	0	1	0	Good	LFT	2018-09-26	SO-2017.1	0
SO_C_20180719_A_1246.JPG	2018-07-19 15:40:59	58.51436944	-135.98680833	214	Abundance	0	0	0	0	Good	LFT	2018-09-26	SO-2017.1	0
SO_C_20180719_A_1247.JPG	2018-07-19 15:41:00	58.51449444	-135.98602500	214	Abundance	0	0	0	0	Good	LFT	2018-09-26	SO-2017.1	0
SO_C_20180719_A_1248.JPG	2018-07-19 15:41:01	58.51461944	-135.98524167	215	Abundance	0	0	0	0	Good	LFT	2018-09-26	SO-2017.1	0
SO_C_20180719_A_1249.JPG	2018-07-19 15:41:02	58.51474444	-135.98445278	215	Abundance	0	0	0	0	Good	LFT	2018-09-26	SO-2017.1	0
SO_C_20180719_A_1250.JPG	2018-07-19 15:41:03	58.51487222	-135.98366111	216	Abundance	0	0	0	0	Good	LFT	2018-09-26	SO-2017.1	0
SO_C_20180719_A_1251.JPG	2018-07-19 15:41:04	58.51500000	-135.98286389	216	Abundance	0	0	0	0	Good	LFT	2018-09-26	SO-2017.1	0
SO_C_20180719_A_1252.JPG	2018-07-19 15:41:05	58.51512778	-135.98206667	216	Abundance	0	0	0	0	Good	LFT	2018-09-26	SO-2017.1	0
SO_C_20180719_A_1253.JPG	2018-07-19 15:41:06	58.51525556	-135.98126389	216	Abundance	0	0	1	0	Good	LFT	2018-09-26	SO-2017.1	0
SO_C_20180719_A_1254.JPG	2018-07-19 15:41:07	58.51538333	-135.98045556	217	Abundance	0	0	1	0	Good	LFT	2018-09-26	SO-2017.1	0
SO_C_20180719_A_1255.JPG	2018-07-19 15:41:08	58.51551111	-135.97964722	216	Abundance	0	0	0	0	Good	LFT	2018-09-26	SO-2017.1	0
SO_C_20180719_A_1256.JPG	2018-07-19 15:41:09	58.51563611	-135.97883611	216	Abundance	0	0	1	0	Good	LFT	2018-09-26	SO-2017.1	0
SO_C_20180719_A_1257.JPG	2018-07-19 15:41:10	58.51576111	-135.97801944	215	Abundance	0	0	0	0	Good	LFT	2018-09-26	SO-2017.1	0
SO_C_20180719_A_1258.JPG	2018-07-19 15:41:11	58.51588611	-135.97720556	214	Abundance	0	0	1	0	Good	LFT	2018-09-26	SO-2017.1	0
SO_C_20180719_A_1259.JPG	2018-07-19 15:41:12	58.51600556	-135.97638889	213	Abundance	0	0	0	0	Good	LFT	2018-09-26	SO-2017.1	0
SO_C_20180719_A_1260.JPG	2018-07-19 15:41:13	58.51611944	-135.97557222	212	Abundance	0	0	0	0	Good	LFT	2018-09-26	SO-2017.1	0
SO_C_20180719_A_1261.JPG	2018-07-19 15:41:14	58.51623056	-135.97475833	212	Abundance	6	0	0	0	Good	LFT	2018-09-26	SO-2017.1	0
SO_C_20180719_A_1262.JPG	2018-07-19 15:41:15	58.51634167	-135.97394167	211	Abundance	0	0	0	0	Good	LFT	2018-09-26	SO-2017.1	0
SO_C_20180719_A_1263.JPG	2018-07-19 15:41:16	58.51645000	-135.97312778	211	Abundance	0	0	1	0	Good	LFT	2018-09-26	SO-2017.1	0
SO_C_20180719_A_1264.JPG	2018-07-19 15:41:17	58.51655833	-135.97231667	210	Abundance	0	0	1	0	Good	LFT	2018-09-26	SO-2017.1	0
SO_C_20180719_A_1265.JPG	2018-07-19 15:41:18	58.51666667	-135.97151389	210	Abundance	0	0	0	0	Good	LFT	2018-09-26	SO-2017.1	0
SO_C_20180719_A_1266.JPG	2018-07-19 15:41:19	58.51677500	-135.97070833	210	Abundance	0	0	1	0	Good	LFT	2018-09-26	SO-2017.1	0
SO_C_20180719_A_1267.JPG	2018-07-19 15:41:20	58.51688889	-135.96991389	210	Abundance	0	0	0	0	Good	LFT	2018-09-26	SO-2017.1	0
SO_C_20180719_A_1268.JPG	2018-07-19 15:41:21	58.51700000	-135.96912222	210	Abundance	0	0	0	0	Good	LFT	2018-09-26	SO-2017.1	0
SO_C_20180719_A_1269.JPG	2018-07-19 15:41:22	58.51711111	-135.96833056	211	Abundance	0	0	0	0	Good	LFT	2018-09-26	SO-2017.1	0
SO_C_20180719_A_1270.JPG	2018-07-19 15:41:23	58.51722222	-135.96753611	211	Abundance	0	0	1	0	Good	LFT	2018-09-26	SO-2017.1	0
SO_C_20180719_A_1271.JPG	2018-07-19 15:41:24	58.51733333	-135.96673611	212	Abundance	0	0	1	0	Good	LFT	2018-09-26	SO-2017.1	0
SO_C_20180719_A_1272.JPG	2018-07-19 15:41:25	58.51743889	-135.96592778	213	Abundance	0	0	0	0	Good	LFT	2018-09-26	SO-2017.1	0
SO_C_20180719_A_1273.JPG	2018-07-19 15:41:26	58.51754722	-135.96511667	213	Abundance	0	0	1	0	Good	LFT	2018-09-26	SO-2017.1	0
SO_C_20180719_A_1274.JPG	2018-07-19 15:41:27	58.51765278	-135.96430000	214	Abundance	0	0	1	0	Good	LFT	2018-09-26	SO-2017.1	0
SO_C_20180719_A_1275.JPG	2018-07-19 15:41:28	58.51775556	-135.96347778	214	Abundance	0	0	1	0	Good	LFT	2018-09-26	SO-2017.1	0
SO_C_20180719_A_1276.JPG	2018-07-19 15:41:29	58.51786111	-135.96265278	214	Abundance	0	0	1	0	Good	LFT	2018-09-26	SO-2017.1	0
SO_C_20180719_A_1277.JPG	2018-07-19 15:41:30	58.51796389	-135.96182500	214	Abundance	0	0	0	0	Good	LFT	2018-09-26	SO-2017.1	0
SO_C_20180719_A_1278.JPG	2018-07-19 15:41:31	58.51806944	-135.96100278	213	Abundance	0	0	0	0	Good	LFT	2018-09-26	SO-2017.1	0
SO_C_20180719_A_1279.JPG	2018-07-19 15:41:32	58.51817500	-135.96019167	212	Abundance	0	0	0	0	Good	LFT	2018-09-26	SO-2017.1	0
SO_C_20180719_A_1280.JPG	2018-07-19 15:41:33	58.51828056	-135.95938056	212	Abundance	0	0	0	0	Good	LFT	2018-09-26	SO-2017.1	0
SO_C_20180719_A_1281.JPG	2018-07-19 15:41:34	58.51838333	-135.95856667	212	Abundance	0	0	0	0	Good	LFT	2018-09-26	SO-2017.1	0
SO_C_20180719_A_1282.JPG	2018-07-19 15:41:35	58.51848611	-135.95775556	211	Abundance	0	0	0	0	Good	LFT	2018-09-26	SO-2017.1	0
SO_C_20180719_A_1283.JPG	2018-07-19 15:41:36	58.51858611	-135.95694444	211	Abundance	0	0	1	0	Good	LFT	2018-09-26	SO-2017.1	0
SO_C_20180719_A_1284.JPG	2018-07-19 15:41:37	58.51868611	-135.95613333	211	Abundance	0	0	1	0	Good	LFT	2018-09-26	SO-2017.1	0
SO_C_20180719_A_1285.JPG	2018-07-19 15:41:38	58.51878611	-135.95532500	211	Abundance	0	0	0	0	Good	LFT	2018-09-26	SO-2017.1	0
SO_C_20180719_A_1286.JPG	2018-07-19 15:41:39	58.51888611	-135.95451944	212	Abundance	0	0	0	0	Good	LFT	2018-09-26	SO-2017.1	0
SO_C_20180719_A_1287.JPG	2018-07-19 15:41:40	58.51898611	-135.95371667	212	Abundance	0	0	0	0	Good	LFT	2018-09-26	SO-2017.1	0
SO_C_20180719_A_1288.JPG	2018-07-19 15:41:41	58.51908889	-135.95291111	212	Abundance	0	0	0	0	Good	LFT	2018-09-26	SO-2017.1	0
SO_C_20180719_A_1289.JPG	2018-07-19 15:41:42	58.51919444	-135.95211667	212	Abundance	0	0	0	0	Good	LFT	2018-09-26	SO-2017.1	0
SO_C_20180719_A_1290.JPG	2018-07-19 15:41:43	58.51930556	-135.95132778	213	Abundance	0	0	0	0	Good	LFT	2018-09-26	SO-2017.1	0
SO_C_20180719_A_1291.JPG	2018-07-19 15:41:44	58.51941944	-135.95054167	213	Abundance	0	0	0	0	Good	LFT	2018-09-26	SO-2017.1	0
SO_C_20180719_A_1292.JPG	2018-07-19 15:41:45	58.51953889	-135.94975556	214	Abundance	0	0	0	0	Good	LFT	2018-09-26	SO-2017.1	0
SO_C_20180719_A_1293.JPG	2018-07-19 15:41:46	58.51966111	-135.94896944	215	Abundance	0	0	0	0	Good	LFT	2018-09-26	SO-2017.1	0
SO_C_20180719_A_1294.JPG	2018-07-19 15:41:47	58.51978333	-135.94818333	215	Abundance	1	1	0	0	Good	LFT	2018-09-26	SO-2017.1	0
SO_C_20180719_A_1295.JPG	2018-07-19 15:41:48	58.51990833	-135.94739444	216	Abundance	0	0	1	0	Good	LFT	2018-09-26	SO-2017.1	0
SO_C_20180719_A_1296.JPG	2018-07-19 15:41:49	58.52003056	-135.94660556	217	Abundance	0	0	0	0	Good	LFT	2018-09-26	SO-2017.1	0
SO_C_20180719_A_1297.JPG	2018-07-19 15:41:50	58.52015278	-135.94581111	217	Abundance	0	0	1	0	Good	LFT	2018-09-26	SO-2017.1	0
SO_C_20180719_A_1298.JPG	2018-07-19 15:41:51	58.52027500	-135.94501389	218	Abundance	0	0	1	0	Good	LFT	2018-09-26	SO-2017.1	0
SO_C_20180719_A_1299.JPG	2018-07-19 15:41:52	58.52039167	-135.94421667	218	Abundance	0	0	1	0	Good	LFT	2018-09-26	SO-2017.1	0
SO_C_20180719_A_1300.JPG	2018-07-19 15:41:53	58.52050833	-135.94341111	218	Abundance	0	0	1	0	Good	LFT	2018-09-26	SO-2017.1	0
SO_C_20180719_A_1301.JPG	2018-07-19 15:41:54	58.52062222	-135.94261111	217	Abundance	2	0	1	1	Good	LFT	2018-09-26	SO-2017.1	0
SO_C_20180719_A_1302.JPG	2018-07-19 15:41:55	58.52073611	-135.94181389	217	Abundance	0	0	1	1	Good	LFT	2018-09-26	SO-2017.1	0
SO_C_20180719_A_1303.JPG	2018-07-19 15:41:56	58.52084722	-135.94101389	217	Abundance	0	0	1	1	Good	LFT	2018-09-26	SO-2017.1	0
SO_C_20180719_A_1304.JPG	2018-07-19 15:41:57	58.52095556	-135.94021667	216	Abundance	0	0	1	0	Good	LFT	2018-09-26	SO-2017.1	0
SO_C_20180719_A_1305.JPG	2018-07-19 15:41:58	58.52106389	-135.93941667	216	Abundance	0	0	1	1	Good	LFT	2018-09-26	SO-2017.1	0
SO_C_20180719_A_1306.JPG	2018-07-19 15:41:59	58.52117222	-135.93862222	216	Abundance	1	0	1	1	Good	LFT	2018-09-26	SO-2017.1	0
SO_C_20180719_A_1307.JPG	2018-07-19 15:42:00	58.52128056	-135.93782778	216	Abundance	0	0	1	0	Good	LFT	2018-09-26	SO-2017.1	0
SO_C_20180719_A_1308.JPG	2018-07-19 15:42:01	58.52139444	-135.93703889	216	Abundance	0	0	1	0	Good	LFT	2018-09-26	SO-2017.1	0
SO_C_20180719_A_1309.JPG	2018-07-19 15:42:02	58.52151111	-135.93625278	216	Abundance	0	0	1	0	Good	LFT	2018-09-26	SO-2017.1	0
SO_C_20180719_A_1310.JPG	2018-07-19 15:42:03	58.52163056	-135.93546944	216	Abundance	0	0	1	0	Good	LFT	2018-09-26	SO-2017.1	0
SO_C_20180719_A_1311.JPG	2018-07-19 15:42:04	58.52175278	-135.93468889	217	Abundance	0	0	1	0	Good	LFT	2018-09-26	SO-2017.1	0
SO_C_20180719_A_1312.JPG	2018-07-19 15:42:05	58.52187778	-135.93391111	217	Abundance	0	0	1	0	Good	LFT	2018-09-26	SO-2017.1	0
SO_C_20180719_A_1313.JPG	2018-07-19 15:42:06	58.52200556	-135.93313333	218	Abundance	0	0	1	0	Good	LFT	2018-09-26	SO-2017.1	0
SO_C_20180719_A_1314.JPG	2018-07-19 15:42:07	58.52213611	-135.93236111	218	Abundance	0	0	1	0	Good	LFT	2018-09-26	SO-2017.1	0
SO_C_20180719_A_1315.JPG	2018-07-19 15:42:08	58.52226944	-135.93159167	219	Abundance	0	0	1	0	Good	LFT	2018-09-26	SO-2017.1	0
SO_C_20180719_A_1316.JPG	2018-07-19 15:42:09	58.52240556	-135.93082222	219	Abundance	0	0	1	0	Good	LFT	2018-09-26	SO-2017.1	0
SO_C_20180719_A_1317.JPG	2018-07-19 15:42:10	58.52254167	-135.93005556	219	Abundance	0	0	1	0	Good	LFT	2018-09-26	SO-2017.1	0
SO_C_20180719_A_1318.JPG	2018-07-19 15:42:11	58.52268333	-135.92928889	219	Abundance	0	0	1	1	Good	LFT	2018-09-26	SO-2017.1	0
SO_C_20180719_A_1319.JPG	2018-07-19 15:42:12	58.52282222	-135.92852222	220	Abundance	0	0	1	1	Good	LFT	2018-09-26	SO-2017.1	0
SO_C_20180719_A_1320.JPG	2018-07-19 15:42:13	58.52296389	-135.92775556	220	Abundance	0	0	1	1	Good	LFT	2018-09-26	SO-2017.1	0
SO_C_20180719_A_1321.JPG	2018-07-19 15:42:14	58.52310278	-135.92698611	220	Abundance	0	0	1	1	Good	LFT	2018-09-26	SO-2017.1	0
SO_C_20180719_A_1322.JPG	2018-07-19 15:42:15	58.52323889	-135.92621389	221	Abundance	0	0	1	1	Good	LFT	2018-09-26	SO-2017.1	0
SO_C_20180719_A_1323.JPG	2018-07-19 15:42:16	58.52336944	-135.92543611	221	Abundance	0	0	1	0	Good	LFT	2018-09-26	SO-2017.1	0
SO_C_20180719_A_1324.JPG	2018-07-19 15:42:17	58.52349444	-135.92465556	221	Abundance	0	0	1	0	Good	LFT	2018-09-26	SO-2017.1	0
SO_C_20180719_A_1325.JPG	2018-07-19 15:42:18	58.52361389	-135.92386944	221	Abundance	0	0	1	0	Good	LFT	2018-09-26	SO-2017.1	0
SO_C_20180719_A_1326.JPG	2018-07-19 15:42:19	58.52373056	-135.92307778	221	Abundance	0	0	1	0	Good	LFT	2018-09-26	SO-2017.1	0
SO_C_20180719_A_1327.JPG	2018-07-19 15:42:20	58.52383889	-135.92228056	221	Abundance	0	0	1	0	Good	LFT	2018-09-26	SO-2017.1	0
SO_C_20180719_A_1328.JPG	2018-07-19 15:42:21	58.52394444	-135.92148056	221	Abundance	0	0	1	0	Good	LFT	2018-09-26	SO-2017.1	0
SO_C_20180719_A_1329.JPG	2018-07-19 15:42:22	58.52405000	-135.92068333	221	Abundance	0	0	1	0	Good	LFT	2018-09-26	SO-2017.1	0
SO_C_20180719_A_1330.JPG	2018-07-19 15:42:23	58.52415278	-135.91988611	221	Abundance	0	0	1	0	Good	LFT	2018-09-26	SO-2017.1	0
SO_C_20180719_A_1331.JPG	2018-07-19 15:42:24	58.52425833	-135.91908889	221	Abundance	0	0	1	0	Good	LFT	2018-09-26	SO-2017.1	0
SO_C_20180719_A_1332.JPG	2018-07-19 15:42:25	58.52436389	-135.91829444	221	Abundance	0	0	1	0	Good	LFT	2018-09-26	SO-2017.1	0
SO_C_20180719_A_1333.JPG	2018-07-19 15:42:26	58.52447222	-135.91750000	221	Abundance	0	0	1	0	Good	LFT	2018-09-26	SO-2017.1	0
SO_C_20180719_A_1334.JPG	2018-07-19 15:42:27	58.52458056	-135.91670556	222	Abundance	0	0	1	0	Good	LFT	2018-09-26	SO-2017.1	0
SO_C_20180719_A_1335.JPG	2018-07-19 15:42:28	58.52469167	-135.91591389	222	Abundance	0	0	1	0	Good	LFT	2018-09-26	SO-2017.1	0
SO_C_20180719_A_1336.JPG	2018-07-19 15:42:29	58.52480556	-135.91512222	223	Abundance	0	0	1	0	Good	LFT	2018-09-26	SO-2017.1	0
SO_C_20180719_A_1337.JPG	2018-07-19 15:42:30	58.52492222	-135.91433333	223	Abundance	0	0	0	0	Good	LFT	2018-09-26	SO-2017.1	0
SO_C_20180719_A_1338.JPG	2018-07-19 15:42:31	58.52504167	-135.91354722	224	Abundance	0	0	0	0	Good	LFT	2018-09-26	SO-2017.1	0
SO_C_20180719_A_1339.JPG	2018-07-19 15:42:32	58.52516389	-135.91276389	224	Abundance	0	0	0	0	Good	LFT	2018-09-26	SO-2017.1	0
SO_C_20180719_A_1340.JPG	2018-07-19 15:42:33	58.52528611	-135.91197778	225	Abundance	0	0	1	0	Good	LFT	2018-09-26	SO-2017.1	0
SO_C_20180719_A_1341.JPG	2018-07-19 15:42:34	58.52541111	-135.91119444	226	Abundance	0	0	1	0	Good	LFT	2018-09-26	SO-2017.1	0
SO_C_20180719_A_1342.JPG	2018-07-19 15:42:35	58.52554167	-135.91040833	226	Abundance	0	0	1	0	Good	LFT	2018-09-26	SO-2017.1	0
SO_C_20180719_A_1343.JPG	2018-07-19 15:42:36	58.52566944	-135.90961944	227	Abundance	0	0	1	0	Good	LFT	2018-09-26	SO-2017.1	0
SO_C_20180719_A_1344.JPG	2018-07-19 15:42:37	58.52579722	-135.90883056	228	Abundance	0	0	0	0	Good	LFT	2018-09-26	SO-2017.1	0
SO_C_20180719_A_1345.JPG	2018-07-19 15:42:38	58.52592500	-135.90803889	228	Abundance	0	0	0	0	Good	LFT	2018-09-26	SO-2017.1	0
SO_C_20180719_A_1346.JPG	2018-07-19 15:42:39	58.52604722	-135.90724722	228	Abundance	0	0	0	0	Good	LFT	2018-09-26	SO-2017.1	0
SO_C_20180719_A_1347.JPG	2018-07-19 15:42:40	58.52617222	-135.90645278	229	Abundance	0	0	1	0	Good	LFT	2018-09-26	SO-2017.1	0
SO_C_20180719_A_1348.JPG	2018-07-19 15:42:41	58.52629444	-135.90565833	229	Abundance	0	0	1	0	Good	LFT	2018-09-26	SO-2017.1	0
SO_C_20180719_A_1349.JPG	2018-07-19 15:42:42	58.52641944	-135.90486389	229	Abundance	0	0	1	0	Good	LFT	2018-09-26	SO-2017.1	0
SO_C_20180719_A_1350.JPG	2018-07-19 15:42:43	58.52654444	-135.90406944	229	Abundance	0	0	1	0	Good	LFT	2018-09-26	SO-2017.1	0
SO_C_20180719_A_1351.JPG	2018-07-19 15:42:44	58.52666944	-135.90327500	229	Abundance	0	0	0	0	Good	LFT	2018-09-26	SO-2017.1	0
SO_C_20180719_A_1352.JPG	2018-07-19 15:42:45	58.52679167	-135.90248056	229	Abundance	0	0	1	0	Good	LFT	2018-09-26	SO-2017.1	0
SO_C_20180719_A_1353.JPG	2018-07-19 15:42:46	58.52691667	-135.90168611	230	Abundance	0	0	1	0	Good	LFT	2018-09-26	SO-2017.1	0
SO_C_20180719_A_1354.JPG	2018-07-19 15:42:47	58.52703889	-135.90089444	230	Abundance	0	0	1	0	Good	LFT	2018-09-26	SO-2017.1	0
SO_C_20180719_A_1355.JPG	2018-07-19 15:42:48	58.52716389	-135.90010000	230	Abundance	0	0	1	0	Good	LFT	2018-09-26	SO-2017.1	0
SO_C_20180719_A_1356.JPG	2018-07-19 15:42:49	58.52728611	-135.89930278	231	Abundance	0	0	0	1	Good	LFT	2018-09-26	SO-2017.1	0
SO_C_20180719_A_1357.JPG	2018-07-19 15:42:50	58.52741389	-135.89851389	231	Abundance	0	0	0	1	Good	LFT	2018-09-26	SO-2017.1	0
SO_C_20180719_A_1358.JPG	2018-07-19 15:42:51	58.52753889	-135.89772500	232	Abundance	0	0	0	1	Good	LFT	2018-09-26	SO-2017.1	0
SO_C_20180719_A_1359.JPG	2018-07-19 15:42:52	58.52766667	-135.89693889	232	Abundance	0	0	0	1	Good	LFT	2018-09-26	SO-2017.1	0
SO_C_20180719_A_1360.JPG	2018-07-19 15:42:53	58.52779167	-135.89615278	233	Abundance	0	0	0	1	Good	LFT	2018-09-26	SO-2017.1	0
SO_C_20180719_A_1361.JPG	2018-07-19 15:42:54	58.52791389	-135.89536667	234	Abundance	0	0	0	1	Good	LFT	2018-09-26	SO-2017.1	0
SO_C_20180719_A_1362.JPG	2018-07-19 15:42:55	58.52803889	-135.89458056	234	Abundance	0	0	0	1	Good	LFT	2018-09-26	SO-2017.1	0
SO_C_20180719_A_1363.JPG	2018-07-19 15:42:56	58.52815833	-135.89379167	235	Abundance	0	0	0	1	Good	LFT	2018-09-26	SO-2017.1	0
SO_C_20180719_A_1364.JPG	2018-07-19 15:42:57	58.52827778	-135.89300000	236	Abundance	0	0	0	1	Good	LFT	2018-09-26	SO-2017.1	0
SO_C_20180719_A_1365.JPG	2018-07-19 15:42:58	58.52839167	-135.89220833	236	Abundance	0	0	0	1	Good	LFT	2018-09-26	SO-2017.1	0
SO_C_20180719_A_1366.JPG	2018-07-19 15:42:59	58.52850556	-135.89141667	237	Abundance	0	0	0	1	Good	LFT	2018-09-26	SO-2017.1	0
SO_C_20180719_A_1367.JPG	2018-07-19 15:43:00	58.52861667	-135.89062500	238	Abundance	0	0	0	1	Good	LFT	2018-09-26	SO-2017.1	0
SO_C_20180719_A_1368.JPG	2018-07-19 15:43:01	58.52872500	-135.88983333	238	Abundance	0	0	0	1	Good	LFT	2018-09-26	SO-2017.1	0
SO_C_20180719_A_1369.JPG	2018-07-19 15:43:02	58.52883056	-135.88903889	239	Abundance	0	0	0	1	Good	LFT	2018-09-26	SO-2017.1	0
SO_C_20180719_A_1370.JPG	2018-07-19 15:43:03	58.52893611	-135.88824444	240	Abundance	0	0	0	1	Good	LFT	2018-09-26	SO-2017.1	0
SO_C_20180719_A_1371.JPG	2018-07-19 15:43:04	58.52903889	-135.88745000	240	Abundance	0	0	0	1	Good	LFT	2018-09-26	SO-2017.1	0
SO_C_20180719_A_1372.JPG	2018-07-19 15:43:05	58.52914167	-135.88665833	241	Abundance	0	0	0	1	Good	LFT	2018-09-26	SO-2017.1	0
SO_C_20180719_A_1373.JPG	2018-07-19 15:43:06	58.52924167	-135.88586667	242	Abundance	0	0	0	1	Good	LFT	2018-09-26	SO-2017.1	0
SO_C_20180719_A_1374.JPG	2018-07-19 15:43:07	58.52933889	-135.88507778	242	Abundance	0	0	0	1	Good	LFT	2018-09-26	SO-2017.1	0
SO_C_20180719_A_1375.JPG	2018-07-19 15:43:08	58.52943611	-135.88428889	243	Abundance	0	0	0	1	Good	LFT	2018-09-26	SO-2017.1	0
SO_C_20180719_A_1376.JPG	2018-07-19 15:43:09	58.52953333	-135.88350000	243	Abundance	0	0	0	1	Good	LFT	2018-09-26	SO-2017.1	0
SO_C_20180719_A_1377.JPG	2018-07-19 15:43:10	58.52963056	-135.88271389	244	Abundance	0	0	1	1	Good	LFT	2018-09-26	SO-2017.1	0
SO_C_20180719_A_1378.JPG	2018-07-19 15:43:11	58.52973056	-135.88192500	245	Abundance	0	0	1	0	Good	LFT	2018-09-26	SO-2017.1	0
SO_C_20180719_A_1379.JPG	2018-07-19 15:43:12	58.52983333	-135.88113611	245	Abundance	0	0	0	0	Good	LFT	2018-09-26	SO-2017.1	0
SO_C_20180719_A_1380.JPG	2018-07-19 15:43:13	58.52994167	-135.88034722	246	Abundance	0	0	0	0	Good	LFT	2018-09-26	SO-2017.1	0
SO_C_20180719_A_1381.JPG	2018-07-19 15:43:14	58.53005278	-135.87956111	247	Abundance	0	0	0	0	Good	LFT	2018-09-26	SO-2017.1	0
SO_C_20180719_A_1382.JPG	2018-07-19 15:43:15	58.53016667	-135.87878056	247	Abundance	0	0	0	0	Good	LFT	2018-09-26	SO-2017.1	0
SO_C_20180719_A_1383.JPG	2018-07-19 15:43:16	58.53028333	-135.87800278	248	Abundance	0	0	1	0	Good	LFT	2018-09-26	SO-2017.1	0
SO_C_20180719_A_1384.JPG	2018-07-19 15:43:17	58.53040556	-135.87723056	249	Abundance	0	0	1	0	Good	LFT	2018-09-26	SO-2017.1	0
SO_C_20180719_A_1385.JPG	2018-07-19 15:43:18	58.53052778	-135.87646111	249	Abundance	0	0	1	0	Good	LFT	2018-09-26	SO-2017.1	0
SO_C_20180719_A_1386.JPG	2018-07-19 15:43:19	58.53065556	-135.87570000	250	Abundance	0	0	1	0	Good	LFT	2018-09-26	SO-2017.1	0
SO_C_20180719_A_1387.JPG	2018-07-19 15:43:20	58.53078889	-135.87494444	251	Abundance	0	0	1	0	Good	LFT	2018-09-26	SO-2017.1	0
SO_C_20180719_A_1388.JPG	2018-07-19 15:43:21	58.53092222	-135.87419167	252	Abundance	0	0	1	0	Good	LFT	2018-09-26	SO-2017.1	0
SO_C_20180719_A_1389.JPG	2018-07-19 15:43:22	58.53105833	-135.87344444	253	Abundance	0	0	1	0	Good	LFT	2018-09-26	SO-2017.1	0
SO_C_20180719_A_1390.JPG	2018-07-19 15:43:23	58.53119444	-135.87270000	254	Abundance	0	0	0	0	Good	LFT	2018-09-26	SO-2017.1	0
SO_C_20180719_A_1391.JPG	2018-07-19 15:43:24	58.53133056	-135.87195556	255	Abundance	0	0	1	0	Good	LFT	2018-09-26	SO-2017.1	0
SO_C_20180719_A_1392.JPG	2018-07-19 15:43:25	58.53147222	-135.87121667	256	Abundance	0	0	1	0	Good	LFT	2018-09-26	SO-2017.1	0
SO_C_20180719_A_1393.JPG	2018-07-19 15:43:26	58.53161389	-135.87047778	257	Abundance	0	0	1	0	Good	LFT	2018-09-26	SO-2017.1	0
SO_C_20180719_A_1394.JPG	2018-07-19 15:43:27	58.53175833	-135.86974444	258	Abundance	0	0	1	0	Good	LFT	2018-09-26	SO-2017.1	0
SO_C_20180719_A_1395.JPG	2018-07-19 15:43:28	58.53190278	-135.86900833	259	Abundance	0	0	1	0	Good	LFT	2018-09-26	SO-2017.1	0
SO_C_20180719_A_1396.JPG	2018-07-19 15:43:29	58.53205000	-135.86827500	260	Abundance	0	0	1	0	Good	LFT	2018-09-26	SO-2017.1	0
SO_C_20180719_A_1397.JPG	2018-07-19 15:43:30	58.53219167	-135.86753889	261	Abundance	1	0	1	0	Good	LFT	2018-09-26	SO-2017.1	0
SO_C_20180719_A_1398.JPG	2018-07-19 15:43:31	58.53233889	-135.86680278	261	Abundance	1	0	1	0	Good	LFT	2018-09-26	SO-2017.1	0
SO_C_20180719_A_1399.JPG	2018-07-19 15:43:32	58.53248611	-135.86606944	262	Abundance	0	0	1	0	Good	LFT	2018-09-26	SO-2017.1	0
SO_C_20180719_A_1400.JPG	2018-07-19 15:43:33	58.53263889	-135.86533611	263	Abundance	0	0	1	0	Good	LFT	2018-09-26	SO-2017.1	0
SO_C_20180719_A_1401.JPG	2018-07-19 15:43:34	58.53279444	-135.86460556	263	Abundance	0	0	1	0	Good	LFT	2018-09-27	SO-2017.1	0
SO_C_20180719_A_1402.JPG	2018-07-19 15:43:35	58.53295556	-135.86387778	263	Abundance	0	0	1	0	Good	LFT	2018-09-27	SO-2017.1	0
SO_C_20180719_A_1403.JPG	2018-07-19 15:43:36	58.53311944	-135.86315278	264	Abundance	0	0	1	0	Good	LFT	2018-09-27	SO-2017.1	0
SO_C_20180719_A_1404.JPG	2018-07-19 15:43:37	58.53328611	-135.86243611	264	Abundance	0	0	1	0	Good	LFT	2018-09-27	SO-2017.1	0
SO_C_20180719_A_1405.JPG	2018-07-19 15:43:38	58.53345556	-135.86171944	264	Abundance	0	0	1	0	Good	LFT	2018-09-27	SO-2017.1	0
SO_C_20180719_A_1406.JPG	2018-07-19 15:43:39	58.53362778	-135.86101111	265	Abundance	0	0	1	0	Good	LFT	2018-09-27	SO-2017.1	0
SO_C_20180719_A_1407.JPG	2018-07-19 15:43:40	58.53380278	-135.86030556	265	Abundance	0	0	1	0	Good	LFT	2018-09-27	SO-2017.1	0
SO_C_20180719_A_1408.JPG	2018-07-19 15:43:41	58.53398056	-135.85960556	266	Abundance	0	0	1	0	Good	LFT	2018-09-27	SO-2017.1	0
SO_C_20180719_A_1409.JPG	2018-07-19 15:43:42	58.53416111	-135.85890833	266	Abundance	0	0	1	0	Good	LFT	2018-09-27	SO-2017.1	0
SO_C_20180719_A_1410.JPG	2018-07-19 15:43:43	58.53434444	-135.85821667	267	Abundance	0	0	1	0	Good	LFT	2018-09-27	SO-2017.1	0
SO_C_20180719_A_1411.JPG	2018-07-19 15:43:44	58.53452778	-135.85753056	268	Abundance	0	0	1	0	Good	LFT	2018-09-27	SO-2017.1	0
SO_C_20180719_A_1412.JPG	2018-07-19 15:43:45	58.53471111	-135.85684722	269	Abundance	0	0	1	0	Good	LFT	2018-09-27	SO-2017.1	0
SO_C_20180719_A_1413.JPG	2018-07-19 15:43:46	58.53489722	-135.85616944	270	Abundance	0	0	1	0	Good	LFT	2018-09-27	SO-2017.1	0
SO_C_20180719_A_1414.JPG	2018-07-19 15:43:47	58.53508889	-135.85549722	271	Abundance	0	0	1	1	Good	LFT	2018-09-27	SO-2017.1	0
SO_C_20180719_A_1415.JPG	2018-07-19 15:43:48	58.53528333	-135.85482500	272	Abundance	0	0	1	1	Good	LFT	2018-09-27	SO-2017.1	0
SO_C_20180719_A_1416.JPG	2018-07-19 15:43:49	58.53548333	-135.85416111	273	Abundance	0	0	0	1	Good	LFT	2018-09-27	SO-2017.1	0
SO_C_20180719_A_1417.JPG	2018-07-19 15:43:50	58.53569167	-135.85350000	274	Abundance	0	0	0	1	Good	LFT	2018-09-27	SO-2017.1	0
SO_C_20180719_A_1418.JPG	2018-07-19 15:43:51	58.53590278	-135.85284444	275	Abundance	0	0	0	1	Good	LFT	2018-09-27	SO-2017.1	0
SO_C_20180719_A_1419.JPG	2018-07-19 15:43:52	58.53611944	-135.85219167	276	Abundance	0	0	0	1	Good	LFT	2018-09-27	SO-2017.1	0
SO_C_20180719_A_1420.JPG	2018-07-19 15:43:53	58.53633611	-135.85154167	277	Abundance	0	0	0	1	Good	LFT	2018-09-27	SO-2017.1	0
SO_C_20180719_A_1421.JPG	2018-07-19 15:43:54	58.53655556	-135.85089444	278	Abundance	0	0	0	1	Good	LFT	2018-09-27	SO-2017.1	0
SO_C_20180719_A_1422.JPG	2018-07-19 15:43:55	58.53677778	-135.85024722	279	Abundance	0	0	0	1	Good	LFT	2018-09-27	SO-2017.1	0
SO_C_20180719_A_1423.JPG	2018-07-19 15:43:56	58.53700556	-135.84960833	280	Abundance	0	0	0	1	Good	LFT	2018-09-27	SO-2017.1	0
SO_C_20180719_A_1424.JPG	2018-07-19 15:43:57	58.53723333	-135.84897222	281	Abundance	0	0	0	1	Good	LFT	2018-09-27	SO-2017.1	0
SO_C_20180719_A_1425.JPG	2018-07-19 15:43:58	58.53746667	-135.84833611	281	Abundance	0	0	0	1	Good	LFT	2018-09-27	SO-2017.1	0
SO_C_20180719_A_1426.JPG	2018-07-19 15:43:59	58.53770000	-135.84770556	282	Abundance	0	0	0	1	Good	LFT	2018-09-27	SO-2017.1	0
SO_C_20180719_A_1427.JPG	2018-07-19 15:44:00	58.53793889	-135.84707778	283	Abundance	0	0	0	1	Good	LFT	2018-09-27	SO-2017.1	0
SO_C_20180719_A_1428.JPG	2018-07-19 15:44:01	58.53817500	-135.84645000	284	Abundance	0	0	0	1	Good	LFT	2018-09-27	SO-2017.1	0
SO_C_20180719_A_1429.JPG	2018-07-19 15:44:02	58.53841667	-135.84582500	285	Abundance	0	0	0	1	Good	LFT	2018-09-27	SO-2017.1	0
SO_C_20180719_A_1430.JPG	2018-07-19 15:44:03	58.53865833	-135.84520278	286	Abundance	0	0	0	1	Good	LFT	2018-09-27	SO-2017.1	0
SO_C_20180719_A_1431.JPG	2018-07-19 15:44:04	58.53890000	-135.84458056	287	Abundance	0	0	0	1	Good	LFT	2018-09-27	SO-2017.1	0
SO_C_20180719_A_1432.JPG	2018-07-19 15:44:05	58.53914444	-135.84395833	288	Abundance	0	0	0	1	Good	LFT	2018-09-27	SO-2017.1	0
SO_C_20180719_A_1433.JPG	2018-07-19 15:44:06	58.53938889	-135.84334167	289	Abundance	0	0	0	1	Good	LFT	2018-09-27	SO-2017.1	0
SO_C_20180719_A_1434.JPG	2018-07-19 15:44:07	58.53964167	-135.84272778	290	Abundance	0	0	0	1	Good	LFT	2018-09-27	SO-2017.1	0
SO_C_20180719_A_1435.JPG	2018-07-19 15:44:08	58.53989444	-135.84211944	291	Abundance	0	0	0	1	Good	LFT	2018-09-27	SO-2017.1	0
SO_C_20180719_A_1436.JPG	2018-07-19 15:44:09	58.54015556	-135.84151389	293	Abundance	0	0	0	1	Good	LFT	2018-09-27	SO-2017.1	0
SO_C_20180719_A_1437.JPG	2018-07-19 15:44:10	58.54041944	-135.84091389	294	Abundance	0	0	0	1	Good	LFT	2018-09-27	SO-2017.1	0
SO_C_20180719_A_1438.JPG	2018-07-19 15:44:11	58.54068333	-135.84031944	295	Abundance	0	0	0	1	Good	LFT	2018-09-27	SO-2017.1	0
SO_C_20180719_A_1439.JPG	2018-07-19 15:44:12	58.54095000	-135.83973056	296	Abundance	0	0	0	1	Good	LFT	2018-09-27	SO-2017.1	0
SO_C_20180719_A_1440.JPG	2018-07-19 15:44:13	58.54121944	-135.83914722	296	Abundance	0	0	0	1	Good	LFT	2018-09-27	SO-2017.1	0
SO_C_20180719_A_1441.JPG	2018-07-19 15:44:14	58.54149444	-135.83856667	297	Abundance	0	0	0	1	Good	LFT	2018-09-27	SO-2017.1	0
SO_C_20180719_A_1442.JPG	2018-07-19 15:44:15	58.54176944	-135.83798611	298	Abundance	0	0	0	1	Good	LFT	2018-09-27	SO-2017.1	0
SO_C_20180719_A_1443.JPG	2018-07-19 15:44:16	58.54204444	-135.83740556	299	Abundance	0	0	0	1	Good	LFT	2018-09-27	SO-2017.1	0
SO_C_20180719_A_1444.JPG	2018-07-19 15:44:17	58.54231944	-135.83682778	300	Abundance	0	0	0	1	Good	LFT	2018-09-27	SO-2017.1	0
SO_C_20180719_A_1445.JPG	2018-07-19 15:44:18	58.54259722	-135.83625278	301	Abundance	0	0	0	1	Good	LFT	2018-09-27	SO-2017.1	0
SO_C_20180719_A_1446.JPG	2018-07-19 15:44:19	58.54287500	-135.83568056	302	Abundance	0	0	0	1	Good	LFT	2018-09-27	SO-2017.1	0
SO_C_20180719_A_1447.JPG	2018-07-19 15:44:20	58.54315556	-135.83511111	304	Abundance	0	0	0	1	Good	LFT	2018-09-27	SO-2017.1	0
SO_C_20180719_A_1448.JPG	2018-07-19 15:44:21	58.54343889	-135.83455000	305	Abundance	0	0	0	1	Good	LFT	2018-09-27	SO-2017.1	0
SO_C_20180719_A_1449.JPG	2018-07-19 15:44:22	58.54372778	-135.83399722	306	Abundance	0	0	0	1	Good	LFT	2018-09-27	SO-2017.1	0
SO_C_20180719_A_1450.JPG	2018-07-19 15:44:23	58.54401944	-135.83344444	307	Abundance	0	0	0	1	Good	LFT	2018-09-27	SO-2017.1	0
SO_C_20180719_A_1451.JPG	2018-07-19 15:44:24	58.54431111	-135.83290278	308	Abundance	0	0	0	1	Good	LFT	2018-09-27	SO-2017.1	0
SO_C_20180719_A_1452.JPG	2018-07-19 15:46:51	58.53380278	-135.84815833	205	Abundance	0	0	0	1	Good	LFT	2018-09-27	SO-2017.1	0
SO_C_20180719_A_1453.JPG	2018-07-19 15:46:52	58.53393889	-135.84891944	205	Abundance	0	0	0	1	Good	LFT	2018-09-27	SO-2017.1	0
SO_C_20180719_A_1454.JPG	2018-07-19 15:46:53	58.53407778	-135.84967500	205	Abundance	0	0	0	1	Good	LFT	2018-09-27	SO-2017.1	0
SO_C_20180719_A_1455.JPG	2018-07-19 15:46:54	58.53421389	-135.85043333	206	Abundance	0	0	0	1	Good	LFT	2018-09-27	SO-2017.1	0
SO_C_20180719_A_1456.JPG	2018-07-19 15:46:55	58.53435000	-135.85118889	206	Abundance	0	0	0	1	Good	LFT	2018-09-27	SO-2017.1	0
SO_C_20180719_A_1457.JPG	2018-07-19 15:46:56	58.53448056	-135.85194444	206	Abundance	0	0	1	1	Good	LFT	2018-09-27	SO-2017.1	0
SO_C_20180719_A_1458.JPG	2018-07-19 15:46:57	58.53460278	-135.85270556	207	Abundance	0	0	1	1	Good	LFT	2018-09-27	SO-2017.1	0
SO_C_20180719_A_1459.JPG	2018-07-19 15:46:58	58.53472222	-135.85346389	208	Abundance	0	0	1	1	Good	LFT	2018-09-27	SO-2017.1	0
SO_C_20180719_A_1460.JPG	2018-07-19 15:46:59	58.53483333	-135.85422222	209	Abundance	0	0	1	0	Good	LFT	2018-09-27	SO-2017.1	0
SO_C_20180719_A_1461.JPG	2018-07-19 15:47:00	58.53494167	-135.85498333	210	Abundance	0	0	1	0	Good	LFT	2018-09-27	SO-2017.1	0
SO_C_20180719_A_1462.JPG	2018-07-19 15:47:01	58.53504167	-135.85574722	211	Abundance	0	0	1	0	Good	LFT	2018-09-27	SO-2017.1	0
SO_C_20180719_A_1463.JPG	2018-07-19 15:47:02	58.53512500	-135.85651667	212	Abundance	0	0	1	0	Good	LFT	2018-09-27	SO-2017.1	0
SO_C_20180719_A_1464.JPG	2018-07-19 15:47:03	58.53519722	-135.85729167	213	Abundance	0	0	1	0	Good	LFT	2018-09-27	SO-2017.1	0
SO_C_20180719_A_1465.JPG	2018-07-19 15:47:04	58.53525556	-135.85807500	214	Abundance	0	0	1	0	Good	LFT	2018-09-27	SO-2017.1	0
SO_C_20180719_A_1466.JPG	2018-07-19 15:47:05	58.53530278	-135.85886389	215	Abundance	0	0	1	1	Good	LFT	2018-09-27	SO-2017.1	0
SO_C_20180719_A_1467.JPG	2018-07-19 15:47:06	58.53533333	-135.85965278	217	Abundance	0	0	1	0	Good	LFT	2018-09-27	SO-2017.1	0
SO_C_20180719_A_1468.JPG	2018-07-19 15:47:07	58.53535000	-135.86045000	218	Abundance	0	0	0	0	Good	LFT	2018-09-27	SO-2017.1	0
SO_C_20180719_A_1469.JPG	2018-07-19 15:47:08	58.53535556	-135.86125000	219	Abundance	0	0	0	0	Good	LFT	2018-09-27	SO-2017.1	0
SO_C_20180719_A_1470.JPG	2018-07-19 15:47:09	58.53534722	-135.86204722	219	Abundance	0	0	0	0	Good	LFT	2018-09-27	SO-2017.1	0
SO_C_20180719_A_1471.JPG	2018-07-19 15:47:10	58.53532222	-135.86284722	220	Abundance	0	0	1	0	Good	LFT	2018-09-27	SO-2017.1	0
SO_C_20180719_A_1472.JPG	2018-07-19 15:47:11	58.53528611	-135.86364722	220	Abundance	0	0	1	0	Good	LFT	2018-09-27	SO-2017.1	0
SO_C_20180719_A_1473.JPG	2018-07-19 15:47:12	58.53524167	-135.86445278	220	Abundance	0	0	1	0	Good	LFT	2018-09-27	SO-2017.1	0
SO_C_20180719_A_1474.JPG	2018-07-19 15:47:13	58.53516111	-135.86530278	220	Abundance	0	0	0	0	Good	LFT	2018-09-27	SO-2017.1	0
SO_C_20180719_A_1475.JPG	2018-07-19 15:47:14	58.53510000	-135.86609444	220	Abundance	0	0	1	0	Good	LFT	2018-09-27	SO-2017.1	0
SO_C_20180719_A_1476.JPG	2018-07-19 15:47:15	58.53503889	-135.86690000	220	Abundance	0	0	1	0	Good	LFT	2018-09-27	SO-2017.1	0
SO_C_20180719_A_1477.JPG	2018-07-19 15:47:16	58.53498611	-135.86770833	220	Abundance	0	0	0	0	Good	LFT	2018-09-27	SO-2017.1	0
SO_C_20180719_A_1478.JPG	2018-07-19 15:47:17	58.53492778	-135.86851389	220	Abundance	0	0	1	0	Good	LFT	2018-09-27	SO-2017.1	0
SO_C_20180719_A_1479.JPG	2018-07-19 15:47:18	58.53487500	-135.86934722	220	Abundance	0	0	1	0	Good	LFT	2018-09-27	SO-2017.1	0
SO_C_20180719_A_1480.JPG	2018-07-19 15:47:19	58.53482222	-135.87010278	219	Abundance	0	0	1	0	Good	LFT	2018-09-27	SO-2017.1	0
SO_C_20180719_A_1481.JPG	2018-07-19 15:47:20	58.53478333	-135.87088333	220	Abundance	0	0	1	0	Good	LFT	2018-09-27	SO-2017.1	0
SO_C_20180719_A_1482.JPG	2018-07-19 15:47:21	58.53476389	-135.87168056	220	Abundance	0	0	1	0	Good	LFT	2018-09-27	SO-2017.1	0
SO_C_20180719_A_1483.JPG	2018-07-19 15:47:22	58.53472500	-135.87248333	220	Abundance	0	0	1	0	Good	LFT	2018-09-27	SO-2017.1	0
SO_C_20180719_A_1484.JPG	2018-07-19 15:47:23	58.53470556	-135.87331111	220	Abundance	0	0	1	0	Good	LFT	2018-09-27	SO-2017.1	0
SO_C_20180719_A_1485.JPG	2018-07-19 15:47:24	58.53468333	-135.87409722	221	Abundance	0	0	1	0	Good	LFT	2018-09-27	SO-2017.1	0
SO_C_20180719_A_1486.JPG	2018-07-19 15:47:25	58.53466944	-135.87490833	221	Abundance	0	0	1	0	Good	LFT	2018-09-27	SO-2017.1	0
SO_C_20180719_A_1487.JPG	2018-07-19 15:47:26	58.53466667	-135.87570833	221	Abundance	0	0	0	0	Good	LFT	2018-09-27	SO-2017.1	0
SO_C_20180719_A_1488.JPG	2018-07-19 15:47:27	58.53464722	-135.87648056	222	Abundance	0	0	0	0	Good	LFT	2018-09-27	SO-2017.1	0
SO_C_20180719_A_1489.JPG	2018-07-19 15:47:28	58.53464444	-135.87728056	222	Abundance	0	0	1	1	Good	LFT	2018-09-27	SO-2017.1	0
SO_C_20180719_A_1490.JPG	2018-07-19 15:47:29	58.53464167	-135.87809444	222	Abundance	0	0	1	1	Good	LFT	2018-09-27	SO-2017.1	0
SO_C_20180719_A_1491.JPG	2018-07-19 15:47:30	58.53464444	-135.87890000	223	Abundance	0	0	0	1	Good	LFT	2018-09-27	SO-2017.1	0
SO_C_20180719_A_1492.JPG	2018-07-19 15:47:31	58.53464444	-135.87971111	223	Abundance	0	0	0	1	Good	LFT	2018-09-27	SO-2017.1	0
SO_C_20180719_A_1493.JPG	2018-07-19 15:47:32	58.53464167	-135.88051389	224	Abundance	0	0	0	1	Good	LFT	2018-09-27	SO-2017.1	0
SO_C_20180719_A_1494.JPG	2018-07-19 15:47:33	58.53464167	-135.88131944	225	Abundance	0	0	0	1	Good	LFT	2018-09-27	SO-2017.1	0
SO_C_20180719_A_1495.JPG	2018-07-19 15:47:34	58.53463611	-135.88213333	226	Abundance	0	0	0	1	Good	LFT	2018-09-27	SO-2017.1	0
SO_C_20180719_A_1496.JPG	2018-07-19 15:47:35	58.53463333	-135.88295556	227	Abundance	0	0	0	1	Good	LFT	2018-09-27	SO-2017.1	0
SO_C_20180719_A_1497.JPG	2018-07-19 15:47:36	58.53462500	-135.88379167	228	Abundance	0	0	0	1	Good	LFT	2018-09-27	SO-2017.1	0
SO_C_20180719_A_1498.JPG	2018-07-19 15:47:37	58.53461111	-135.88461667	229	Abundance	0	0	0	1	Good	LFT	2018-09-27	SO-2017.1	0
SO_C_20180719_A_1499.JPG	2018-07-19 15:47:38	58.53460833	-135.88545556	229	Abundance	0	0	0	1	Good	LFT	2018-09-27	SO-2017.1	0
SO_C_20180719_A_1500.JPG	2018-07-19 15:47:39	58.53460000	-135.88630556	230	Abundance	0	0	0	1	Good	LFT	2018-09-27	SO-2017.1	0
SO_C_20180719_A_1501.JPG	2018-07-19 15:47:40	58.53459722	-135.88714167	230	Abundance	0	0	0	1	Good	LFT	2018-09-27	SO-2017.1	0
SO_C_20180719_A_1502.JPG	2018-07-19 15:47:41	58.53458889	-135.88799722	230	Abundance	0	0	0	1	Good	LFT	2018-09-27	SO-2017.1	0
SO_C_20180719_A_1503.JPG	2018-07-19 15:47:42	58.53458611	-135.88886111	230	Abundance	0	0	0	1	Good	LFT	2018-09-27	SO-2017.1	0
SO_C_20180719_A_1504.JPG	2018-07-19 15:47:43	58.53457778	-135.88972222	230	Abundance	0	0	0	1	Good	LFT	2018-09-27	SO-2017.1	0
SO_C_20180719_A_1505.JPG	2018-07-19 15:47:44	58.53456667	-135.89058611	229	Abundance	0	0	0	1	Good	LFT	2018-09-27	SO-2017.1	0
SO_C_20180719_A_1506.JPG	2018-07-19 15:47:45	58.53455278	-135.89142500	228	Abundance	0	0	0	1	Good	LFT	2018-09-27	SO-2017.1	0
SO_C_20180719_A_1507.JPG	2018-07-19 15:47:46	58.53457500	-135.89226944	227	Abundance	0	0	0	1	Good	LFT	2018-09-27	SO-2017.1	0
SO_C_20180719_A_1508.JPG	2018-07-19 15:47:47	58.53457500	-135.89310833	226	Abundance	0	0	0	1	Good	LFT	2018-09-27	SO-2017.1	0
SO_C_20180719_A_1509.JPG	2018-07-19 15:47:48	58.53456389	-135.89393611	225	Abundance	0	0	0	1	Good	LFT	2018-09-27	SO-2017.1	0
SO_C_20180719_A_1510.JPG	2018-07-19 15:47:49	58.53455278	-135.89475556	224	Abundance	0	0	0	1	Good	LFT	2018-09-27	SO-2017.1	0
SO_C_20180719_A_1511.JPG	2018-07-19 15:47:50	58.53451944	-135.89557500	224	Abundance	0	0	0	1	Good	LFT	2018-09-27	SO-2017.1	0
SO_C_20180719_A_1512.JPG	2018-07-19 15:47:51	58.53450556	-135.89640000	224	Abundance	0	0	0	1	Good	LFT	2018-09-27	SO-2017.1	0
SO_C_20180719_A_1513.JPG	2018-07-19 15:47:52	58.53450556	-135.89719444	224	Abundance	0	0	0	1	Good	LFT	2018-09-27	SO-2017.1	0
SO_C_20180719_A_1514.JPG	2018-07-19 15:47:53	58.53450278	-135.89800278	225	Abundance	0	0	0	1	Good	LFT	2018-09-27	SO-2017.1	0
SO_C_20180719_A_1515.JPG	2018-07-19 15:47:54	58.53450000	-135.89881389	226	Abundance	0	0	0	1	Good	LFT	2018-09-27	SO-2017.1	0
SO_C_20180719_A_1516.JPG	2018-07-19 15:47:55	58.53450278	-135.89961944	227	Abundance	0	0	1	1	Good	LFT	2018-09-27	SO-2017.1	0
SO_C_20180719_A_1517.JPG	2018-07-19 15:47:56	58.53450833	-135.90044722	227	Abundance	0	0	1	1	Good	LFT	2018-09-27	SO-2017.1	0
SO_C_20180719_A_1518.JPG	2018-07-19 15:47:57	58.53450833	-135.90127778	228	Abundance	0	0	1	0	Good	LFT	2018-09-27	SO-2017.1	0
SO_C_20180719_A_1519.JPG	2018-07-19 15:47:58	58.53451667	-135.90211111	228	Abundance	0	0	1	0	Good	LFT	2018-09-27	SO-2017.1	0
SO_C_20180719_A_1520.JPG	2018-07-19 15:47:59	58.53453056	-135.90295000	228	Abundance	0	0	0	0	Good	LFT	2018-09-27	SO-2017.1	0
SO_C_20180719_A_1521.JPG	2018-07-19 15:48:00	58.53452778	-135.90380000	228	Abundance	0	0	0	0	Good	LFT	2018-09-27	SO-2017.1	0
SO_C_20180719_A_1522.JPG	2018-07-19 15:48:01	58.53453611	-135.90461667	227	Abundance	0	0	0	0	Good	LFT	2018-09-27	SO-2017.1	0
SO_C_20180719_A_1523.JPG	2018-07-19 15:48:02	58.53454167	-135.90543611	227	Abundance	0	0	0	0	Good	LFT	2018-09-27	SO-2017.1	0
SO_C_20180719_A_1524.JPG	2018-07-19 15:48:03	58.53454444	-135.90625556	226	Abundance	0	0	0	0	Good	LFT	2018-09-27	SO-2017.1	0
SO_C_20180719_A_1525.JPG	2018-07-19 15:48:04	58.53457222	-135.90700556	226	Abundance	0	0	0	0	Good	LFT	2018-09-27	SO-2017.1	0
SO_C_20180719_A_1526.JPG	2018-07-19 15:48:05	58.53456667	-135.90784167	225	Abundance	0	0	0	0	Good	LFT	2018-09-27	SO-2017.1	0
SO_C_20180719_A_1527.JPG	2018-07-19 15:48:06	58.53455833	-135.90867778	225	Abundance	0	0	0	0	Good	LFT	2018-09-27	SO-2017.1	0
SO_C_20180719_A_1528.JPG	2018-07-19 15:48:07	58.53455556	-135.90950833	225	Abundance	0	0	1	0	Good	LFT	2018-09-27	SO-2017.1	0
SO_C_20180719_A_1529.JPG	2018-07-19 15:48:08	58.53455833	-135.91034444	225	Abundance	0	0	1	0	Good	LFT	2018-09-27	SO-2017.1	0
SO_C_20180719_A_1530.JPG	2018-07-19 15:48:09	58.53455000	-135.91118611	224	Abundance	0	0	1	0	Good	LFT	2018-09-27	SO-2017.1	0
SO_C_20180719_A_1531.JPG	2018-07-19 15:48:10	58.53453889	-135.91201389	224	Abundance	0	0	0	0	Good	LFT	2018-09-27	SO-2017.1	0
SO_C_20180719_A_1532.JPG	2018-07-19 15:48:11	58.53454722	-135.91281389	225	Abundance	0	0	0	0	Good	LFT	2018-09-27	SO-2017.1	0
SO_C_20180719_A_1533.JPG	2018-07-19 15:48:12	58.53454167	-135.91361389	225	Abundance	0	0	1	0	Good	LFT	2018-09-27	SO-2017.1	0
SO_C_20180719_A_1534.JPG	2018-07-19 15:48:13	58.53454167	-135.91441944	225	Abundance	0	0	1	0	Good	LFT	2018-09-27	SO-2017.1	0
SO_C_20180719_A_1535.JPG	2018-07-19 15:48:14	58.53454444	-135.91525278	225	Abundance	0	0	0	0	Good	LFT	2018-09-27	SO-2017.1	0
SO_C_20180719_A_1536.JPG	2018-07-19 15:48:15	58.53454167	-135.91607500	225	Abundance	0	0	1	0	Good	LFT	2018-09-27	SO-2017.1	0
SO_C_20180719_A_1537.JPG	2018-07-19 15:48:16	58.53453333	-135.91688056	225	Abundance	0	0	1	0	Good	LFT	2018-09-27	SO-2017.1	0
SO_C_20180719_A_1538.JPG	2018-07-19 15:48:17	58.53452222	-135.91769722	225	Abundance	0	0	1	0	Good	LFT	2018-09-27	SO-2017.1	0
SO_C_20180719_A_1539.JPG	2018-07-19 15:48:18	58.53450833	-135.91851389	224	Abundance	0	0	1	0	Good	LFT	2018-09-27	SO-2017.1	0
SO_C_20180719_A_1540.JPG	2018-07-19 15:48:19	58.53449444	-135.91933333	224	Abundance	0	0	1	0	Good	LFT	2018-09-27	SO-2017.1	0
SO_C_20180719_A_1541.JPG	2018-07-19 15:48:20	58.53447778	-135.92015278	223	Abundance	0	0	1	0	Good	LFT	2018-09-27	SO-2017.1	0
SO_C_20180719_A_1542.JPG	2018-07-19 15:48:21	58.53445833	-135.92095278	222	Abundance	0	0	0	0	Good	LFT	2018-09-27	SO-2017.1	0
SO_C_20180719_A_1543.JPG	2018-07-19 15:48:22	58.53445000	-135.92175000	221	Abundance	0	0	0	0	Good	LFT	2018-09-27	SO-2017.1	0
SO_C_20180719_A_1544.JPG	2018-07-19 15:48:23	58.53445833	-135.92252222	221	Abundance	0	0	0	0	Good	LFT	2018-09-27	SO-2017.1	0
SO_C_20180719_A_1545.JPG	2018-07-19 15:48:24	58.53443611	-135.92333889	220	Abundance	0	0	0	0	Good	LFT	2018-09-27	SO-2017.1	0
SO_C_20180719_A_1546.JPG	2018-07-19 15:48:25	58.53443333	-135.92415556	219	Abundance	0	0	0	0	Good	LFT	2018-09-27	SO-2017.1	0
SO_C_20180719_A_1547.JPG	2018-07-19 15:48:26	58.53442222	-135.92498889	219	Abundance	0	0	0	0	Good	LFT	2018-09-27	SO-2017.1	0
SO_C_20180719_A_1548.JPG	2018-07-19 15:48:27	58.53440556	-135.92580833	219	Abundance	0	0	0	0	Good	LFT	2018-09-27	SO-2017.1	0
SO_C_20180719_A_1549.JPG	2018-07-19 15:48:28	58.53440833	-135.92664167	219	Abundance	0	0	1	0	Good	LFT	2018-09-27	SO-2017.1	0
SO_C_20180719_A_1550.JPG	2018-07-19 15:48:29	58.53439167	-135.92745000	219	Abundance	0	0	1	1	Good	LFT	2018-09-27	SO-2017.1	0
SO_C_20180719_A_1551.JPG	2018-07-19 15:48:30	58.53437222	-135.92825556	219	Abundance	0	0	1	1	Good	LFT	2018-09-27	SO-2017.1	0
SO_C_20180719_A_1552.JPG	2018-07-19 15:48:31	58.53435556	-135.92906389	219	Abundance	0	0	0	1	Good	LFT	2018-09-27	SO-2017.1	0
SO_C_20180719_A_1553.JPG	2018-07-19 15:48:32	58.53433889	-135.92986667	219	Abundance	0	0	1	1	Good	LFT	2018-09-27	SO-2017.1	0
SO_C_20180719_A_1554.JPG	2018-07-19 15:48:33	58.53433056	-135.93067500	219	Abundance	0	0	1	1	Good	LFT	2018-09-27	SO-2017.1	0
SO_C_20180719_A_1555.JPG	2018-07-19 15:48:34	58.53432222	-135.93148333	219	Abundance	0	0	1	1	Good	LFT	2018-09-27	SO-2017.1	0
SO_C_20180719_A_1556.JPG	2018-07-19 15:48:35	58.53431944	-135.93229444	219	Abundance	0	0	0	0	Good	LFT	2018-09-27	SO-2017.1	0
SO_C_20180719_A_1557.JPG	2018-07-19 15:48:36	58.53425278	-135.93311389	219	Abundance	0	0	0	0	Good	LFT	2018-09-27	SO-2017.1	0
SO_C_20180719_A_1558.JPG	2018-07-19 15:48:37	58.53425833	-135.93403889	219	Abundance	0	0	1	0	Good	LFT	2018-09-27	SO-2017.1	0
SO_C_20180719_A_1559.JPG	2018-07-19 15:48:38	58.53425278	-135.93485278	219	Abundance	0	0	1	0	Good	LFT	2018-09-27	SO-2017.1	0
SO_C_20180719_A_1560.JPG	2018-07-19 15:48:39	58.53425000	-135.93566667	219	Abundance	0	0	1	0	Good	LFT	2018-09-27	SO-2017.1	0
SO_C_20180719_A_1561.JPG	2018-07-19 15:48:40	58.53424167	-135.93648611	219	Abundance	0	0	1	1	Good	LFT	2018-09-27	SO-2017.1	0
SO_C_20180719_A_1562.JPG	2018-07-19 15:48:41	58.53422500	-135.93730556	219	Abundance	0	0	1	1	Good	LFT	2018-09-27	SO-2017.1	0
SO_C_20180719_A_1563.JPG	2018-07-19 15:48:42	58.53421389	-135.93812778	218	Abundance	0	0	0	1	Good	LFT	2018-09-27	SO-2017.1	0
SO_C_20180719_A_1564.JPG	2018-07-19 15:48:43	58.53420556	-135.93893056	218	Abundance	0	0	0	1	Good	LFT	2018-09-27	SO-2017.1	0
SO_C_20180719_A_1565.JPG	2018-07-19 15:48:44	58.53418611	-135.93973889	217	Abundance	0	0	0	1	Good	LFT	2018-09-27	SO-2017.1	0
SO_C_20180719_A_1566.JPG	2018-07-19 15:48:45	58.53415833	-135.94056111	217	Abundance	0	0	0	1	Good	LFT	2018-09-27	SO-2017.1	0
SO_C_20180719_A_1567.JPG	2018-07-19 15:48:46	58.53414167	-135.94138889	216	Abundance	0	0	1	1	Good	LFT	2018-09-27	SO-2017.1	0
SO_C_20180719_A_1568.JPG	2018-07-19 15:48:47	58.53412500	-135.94223333	215	Abundance	0	0	1	1	Good	LFT	2018-09-27	SO-2017.1	0
SO_C_20180719_A_1569.JPG	2018-07-19 15:48:48	58.53410833	-135.94305833	215	Abundance	0	0	1	1	Good	LFT	2018-09-27	SO-2017.1	0
SO_C_20180719_A_1570.JPG	2018-07-19 15:48:49	58.53410556	-135.94384167	214	Abundance	0	0	0	0	Good	LFT	2018-09-27	SO-2017.1	0
SO_C_20180719_A_1571.JPG	2018-07-19 15:48:50	58.53411389	-135.94465833	214	Abundance	0	0	0	0	Good	LFT	2018-09-27	SO-2017.1	0
SO_C_20180719_A_1572.JPG	2018-07-19 15:48:51	58.53411667	-135.94547778	214	Abundance	0	0	0	0	Good	LFT	2018-09-27	SO-2017.1	0
SO_C_20180719_A_1573.JPG	2018-07-19 15:48:52	58.53411667	-135.94631667	214	Abundance	0	0	0	0	Good	LFT	2018-09-27	SO-2017.1	0
SO_C_20180719_A_1574.JPG	2018-07-19 15:48:53	58.53411389	-135.94716667	214	Abundance	0	0	1	0	Good	LFT	2018-09-27	SO-2017.1	0
SO_C_20180719_A_1575.JPG	2018-07-19 15:48:54	58.53410833	-135.94798056	214	Abundance	0	0	0	0	Good	LFT	2018-09-27	SO-2017.1	0
SO_C_20180719_A_1576.JPG	2018-07-19 15:48:55	58.53410556	-135.94881111	215	Abundance	0	0	0	0	Good	LFT	2018-09-27	SO-2017.1	0
SO_C_20180719_A_1577.JPG	2018-07-19 15:48:56	58.53410278	-135.94963056	215	Abundance	0	0	0	0	Good	LFT	2018-09-27	SO-2017.1	0
SO_C_20180719_A_1578.JPG	2018-07-19 15:48:57	58.53411667	-135.95044444	216	Abundance	0	0	0	0	Good	LFT	2018-09-27	SO-2017.1	0
SO_C_20180719_A_1579.JPG	2018-07-19 15:48:58	58.53412778	-135.95128611	216	Abundance	0	0	0	0	Good	LFT	2018-09-27	SO-2017.1	0
SO_C_20180719_A_1580.JPG	2018-07-19 15:48:59	58.53413333	-135.95212222	216	Abundance	0	0	1	0	Good	LFT	2018-09-27	SO-2017.1	0
SO_C_20180719_A_1581.JPG	2018-07-19 15:49:00	58.53413611	-135.95295833	216	Abundance	0	0	1	0	Good	LFT	2018-09-27	SO-2017.1	0
SO_C_20180719_A_1582.JPG	2018-07-19 15:49:01	58.53413611	-135.95380000	217	Abundance	0	0	1	1	Good	LFT	2018-09-27	SO-2017.1	0
SO_C_20180719_A_1583.JPG	2018-07-19 15:49:02	58.53413056	-135.95464722	217	Abundance	0	0	1	1	Good	LFT	2018-09-27	SO-2017.1	0
SO_C_20180719_A_1584.JPG	2018-07-19 15:49:03	58.53412500	-135.95548889	217	Abundance	0	0	1	1	Good	LFT	2018-09-27	SO-2017.1	0
SO_C_20180719_A_1585.JPG	2018-07-19 15:49:04	58.53411389	-135.95633056	217	Abundance	0	0	1	1	Good	LFT	2018-09-27	SO-2017.1	0
SO_C_20180719_A_1586.JPG	2018-07-19 15:49:05	58.53410000	-135.95716667	217	Abundance	0	0	1	1	Good	LFT	2018-09-27	SO-2017.1	0
SO_C_20180719_A_1587.JPG	2018-07-19 15:49:06	58.53408056	-135.95800556	217	Abundance	0	0	1	0	Good	LFT	2018-09-27	SO-2017.1	0
SO_C_20180719_A_1588.JPG	2018-07-19 15:49:07	58.53406111	-135.95883889	217	Abundance	0	0	1	1	Good	LFT	2018-09-27	SO-2017.1	0
SO_C_20180719_A_1589.JPG	2018-07-19 15:49:08	58.53404167	-135.95967222	216	Abundance	0	0	1	0	Good	LFT	2018-09-27	SO-2017.1	0
SO_C_20180719_A_1590.JPG	2018-07-19 15:49:09	58.53401944	-135.96050278	216	Abundance	0	0	1	0	Good	LFT	2018-09-27	SO-2017.1	0
SO_C_20180719_A_1591.JPG	2018-07-19 15:54:45	58.53626944	-136.18203333	211	Abundance	0	0	1	1	Good	LFT	2018-09-27	SO-2017.1	0
SO_C_20180719_A_1592.JPG	2018-07-19 15:54:46	58.53623333	-136.18120000	211	Abundance	0	0	1	1	Good	LFT	2018-09-27	SO-2017.1	0
SO_C_20180719_A_1593.JPG	2018-07-19 15:54:47	58.53618333	-136.18037222	210	Abundance	0	0	0	1	Good	LFT	2018-09-27	SO-2017.1	0
SO_C_20180719_A_1594.JPG	2018-07-19 15:54:48	58.53616111	-136.17954722	210	Abundance	0	0	0	1	Good	LFT	2018-09-27	SO-2017.1	0
SO_C_20180719_A_1595.JPG	2018-07-19 15:54:49	58.53614444	-136.17872500	210	Abundance	0	0	0	1	Good	LFT	2018-09-27	SO-2017.1	0
SO_C_20180719_A_1596.JPG	2018-07-19 15:54:50	58.53613333	-136.17789444	210	Abundance	0	0	0	1	Good	LFT	2018-09-27	SO-2017.1	0
SO_C_20180719_A_1597.JPG	2018-07-19 15:54:51	58.53612500	-136.17706944	211	Abundance	0	0	0	1	Good	LFT	2018-09-27	SO-2017.1	0
SO_C_20180719_A_1598.JPG	2018-07-19 15:54:52	58.53612500	-136.17624167	212	Abundance	0	0	0	1	Good	LFT	2018-09-27	SO-2017.1	0
SO_C_20180719_A_1599.JPG	2018-07-19 15:54:53	58.53612500	-136.17541389	212	Abundance	0	0	0	1	Good	LFT	2018-09-27	SO-2017.1	0
SO_C_20180719_A_1600.JPG	2018-07-19 15:54:54	58.53612222	-136.17458889	213	Abundance	0	0	1	1	Good	LFT	2018-09-27	SO-2017.1	0
SO_C_20180719_A_1601.JPG	2018-07-19 15:54:55	58.53611944	-136.17375833	213	Abundance	0	0	1	1	Good	LFT	2018-09-27	SO-2017.1	0
SO_C_20180719_A_1602.JPG	2018-07-19 15:54:56	58.53612222	-136.17292778	214	Abundance	0	0	0	0	Good	LFT	2018-09-27	SO-2017.1	0
SO_C_20180719_A_1603.JPG	2018-07-19 15:54:57	58.53612500	-136.17210000	214	Abundance	0	0	0	0	Good	LFT	2018-09-27	SO-2017.1	0
SO_C_20180719_A_1604.JPG	2018-07-19 15:54:58	58.53613056	-136.17126667	214	Abundance	0	0	0	0	Good	LFT	2018-09-27	SO-2017.1	0
SO_C_20180719_A_1605.JPG	2018-07-19 15:54:59	58.53613889	-136.17043889	214	Abundance	0	0	0	0	Good	LFT	2018-09-27	SO-2017.1	0
SO_C_20180719_A_1606.JPG	2018-07-19 15:55:00	58.53615000	-136.16960833	214	Abundance	3	0	0	0	Good	LFT	2018-09-27	SO-2017.1	0
SO_C_20180719_A_1607.JPG	2018-07-19 15:55:01	58.53615833	-136.16877500	214	Abundance	5	0	0	0	Good	LFT	2018-09-27	SO-2017.1	0
SO_C_20180719_A_1608.JPG	2018-07-19 15:55:02	58.53616667	-136.16794444	214	Abundance	0	0	0	0	Good	LFT	2018-09-27	SO-2017.1	0
SO_C_20180719_A_1609.JPG	2018-07-19 15:55:03	58.53617222	-136.16711389	214	Abundance	0	0	0	0	Good	LFT	2018-09-27	SO-2017.1	0
SO_C_20180719_A_1610.JPG	2018-07-19 15:55:04	58.53617222	-136.16628611	214	Abundance	0	0	1	0	Good	LFT	2018-09-27	SO-2017.1	0
SO_C_20180719_A_1611.JPG	2018-07-19 15:55:05	58.53618056	-136.16546111	214	Abundance	0	0	0	0	Good	LFT	2018-09-27	SO-2017.1	0
SO_C_20180719_A_1612.JPG	2018-07-19 15:55:06	58.53619167	-136.16463611	214	Abundance	0	0	0	0	Good	LFT	2018-09-27	SO-2017.1	0
SO_C_20180719_A_1613.JPG	2018-07-19 15:55:07	58.53620556	-136.16381111	214	Abundance	0	0	0	0	Good	LFT	2018-09-27	SO-2017.1	0
SO_C_20180719_A_1614.JPG	2018-07-19 15:55:08	58.53622222	-136.16298611	214	Abundance	0	0	0	0	Good	LFT	2018-09-27	SO-2017.1	0
SO_C_20180719_A_1615.JPG	2018-07-19 15:55:09	58.53623889	-136.16215833	214	Abundance	0	0	0	0	Good	LFT	2018-09-27	SO-2017.1	0
SO_C_20180719_A_1616.JPG	2018-07-19 15:55:10	58.53624722	-136.16133611	215	Abundance	0	0	0	0	Good	LFT	2018-09-27	SO-2017.1	0
SO_C_20180719_A_1617.JPG	2018-07-19 15:55:11	58.53625278	-136.16051111	215	Abundance	0	0	0	0	Good	LFT	2018-09-27	SO-2017.1	0
SO_C_20180719_A_1618.JPG	2018-07-19 15:55:12	58.53625000	-136.15968889	215	Abundance	0	0	0	0	Good	LFT	2018-09-27	SO-2017.1	0
SO_C_20180719_A_1619.JPG	2018-07-19 15:55:13	58.53624167	-136.15886944	215	Abundance	0	0	0	0	Good	LFT	2018-09-27	SO-2017.1	0
SO_C_20180719_A_1620.JPG	2018-07-19 15:55:14	58.53623056	-136.15805000	215	Abundance	0	0	1	0	Good	LFT	2018-09-27	SO-2017.1	0
SO_C_20180719_A_1621.JPG	2018-07-19 15:55:15	58.53621389	-136.15723333	215	Abundance	0	0	1	0	Good	LFT	2018-09-27	SO-2017.1	0
SO_C_20180719_A_1622.JPG	2018-07-19 15:55:16	58.53619167	-136.15641944	215	Abundance	0	0	1	0	Good	LFT	2018-09-27	SO-2017.1	0
SO_C_20180719_A_1623.JPG	2018-07-19 15:55:17	58.53616667	-136.15560833	215	Abundance	0	0	1	0	Good	LFT	2018-09-27	SO-2017.1	0
SO_C_20180719_A_1624.JPG	2018-07-19 15:55:18	58.53614167	-136.15480278	215	Abundance	0	0	1	0	Good	LFT	2018-09-27	SO-2017.1	0
SO_C_20180719_A_1625.JPG	2018-07-19 15:55:19	58.53611667	-136.15400278	215	Abundance	0	0	1	0	Good	LFT	2018-09-27	SO-2017.1	0
SO_C_20180719_A_1626.JPG	2018-07-19 15:55:20	58.53608889	-136.15320833	215	Abundance	1	0	1	0	Good	LFT	2018-09-27	SO-2017.1	0
SO_C_20180719_A_1627.JPG	2018-07-19 15:55:21	58.53606111	-136.15241667	215	Abundance	0	0	1	1	Good	LFT	2018-09-27	SO-2017.1	0
SO_C_20180719_A_1628.JPG	2018-07-19 15:55:22	58.53603889	-136.15162778	216	Abundance	0	0	0	1	Good	LFT	2018-09-27	SO-2017.1	0
SO_C_20180719_A_1629.JPG	2018-07-19 15:55:23	58.53602500	-136.15083889	216	Abundance	0	0	0	1	Good	LFT	2018-09-27	SO-2017.1	0
SO_C_20180719_A_1630.JPG	2018-07-19 15:55:24	58.53601667	-136.15005000	217	Abundance	0	0	0	1	Good	LFT	2018-09-27	SO-2017.1	0
SO_C_20180719_A_1631.JPG	2018-07-19 15:55:25	58.53601944	-136.14925833	218	Abundance	0	0	0	1	Good	LFT	2018-09-27	SO-2017.1	0
SO_C_20180719_A_1632.JPG	2018-07-19 15:55:26	58.53602778	-136.14846389	218	Abundance	0	0	0	1	Good	LFT	2018-09-27	SO-2017.1	0
SO_C_20180719_A_1633.JPG	2018-07-19 15:55:27	58.53604444	-136.14766667	219	Abundance	0	0	0	1	Good	LFT	2018-09-27	SO-2017.1	0
SO_C_20180719_A_1634.JPG	2018-07-19 15:55:28	58.53606944	-136.14686667	220	Abundance	0	0	0	1	Good	LFT	2018-09-27	SO-2017.1	0
SO_C_20180719_A_1635.JPG	2018-07-19 15:55:29	58.53610278	-136.14606389	221	Abundance	0	0	0	1	Good	LFT	2018-09-27	SO-2017.1	0
SO_C_20180719_A_1636.JPG	2018-07-19 15:55:30	58.53613889	-136.14525556	221	Abundance	0	0	0	1	Good	LFT	2018-09-27	SO-2017.1	0
SO_C_20180719_A_1637.JPG	2018-07-19 15:55:31	58.53618056	-136.14444167	221	Abundance	0	0	0	1	Good	LFT	2018-09-27	SO-2017.1	0
SO_C_20180719_A_1638.JPG	2018-07-19 15:55:32	58.53622222	-136.14362500	221	Abundance	0	0	0	1	Good	LFT	2018-09-27	SO-2017.1	0
SO_C_20180719_A_1639.JPG	2018-07-19 15:55:33	58.53626111	-136.14280556	221	Abundance	0	0	1	1	Good	LFT	2018-09-27	SO-2017.1	0
SO_C_20180719_A_1640.JPG	2018-07-19 15:55:34	58.53629722	-136.14198056	220	Abundance	0	0	1	0	Good	LFT	2018-09-27	SO-2017.1	0
SO_C_20180719_A_1641.JPG	2018-07-19 15:55:35	58.53632500	-136.14115278	220	Abundance	0	0	1	0	Good	LFT	2018-09-27	SO-2017.1	0
SO_C_20180719_A_1642.JPG	2018-07-19 15:55:36	58.53635000	-136.14032222	219	Abundance	0	0	1	0	Good	LFT	2018-09-27	SO-2017.1	0
SO_C_20180719_A_1643.JPG	2018-07-19 15:55:37	58.53636944	-136.13945556	219	Abundance	0	0	1	0	Good	LFT	2018-09-27	SO-2017.1	0
SO_C_20180719_A_1644.JPG	2018-07-19 15:55:38	58.53638056	-136.13861944	218	Abundance	0	0	1	0	Good	LFT	2018-09-27	SO-2017.1	0
SO_C_20180719_A_1645.JPG	2018-07-19 15:55:39	58.53636944	-136.13777500	217	Abundance	0	0	1	0	Good	LFT	2018-09-27	SO-2017.1	0
SO_C_20180719_A_1646.JPG	2018-07-19 15:55:40	58.53639444	-136.13694167	217	Abundance	0	0	0	0	Good	LFT	2018-09-27	SO-2017.1	0
SO_C_20180719_A_1647.JPG	2018-07-19 15:55:41	58.53639444	-136.13610278	216	Abundance	0	0	1	0	Good	LFT	2018-09-27	SO-2017.1	0
SO_C_20180719_A_1648.JPG	2018-07-19 15:55:42	58.53638889	-136.13526667	216	Abundance	0	0	1	0	Good	LFT	2018-09-27	SO-2017.1	0
SO_C_20180719_A_1649.JPG	2018-07-19 15:55:43	58.53637778	-136.13443889	215	Abundance	0	0	0	0	Good	LFT	2018-09-27	SO-2017.1	0
SO_C_20180719_A_1650.JPG	2018-07-19 15:55:44	58.53636389	-136.13360556	215	Abundance	0	0	1	0	Good	LFT	2018-09-27	SO-2017.1	0
SO_C_20180719_A_1651.JPG	2018-07-19 15:55:45	58.53634722	-136.13277222	214	Abundance	0	0	1	0	Good	LFT	2018-09-27	SO-2017.1	0
SO_C_20180719_A_1652.JPG	2018-07-19 15:55:46	58.53632500	-136.13193889	214	Abundance	0	0	1	0	Good	LFT	2018-09-27	SO-2017.1	0
SO_C_20180719_A_1653.JPG	2018-07-19 15:55:47	58.53630556	-136.13111111	214	Abundance	0	0	1	0	Good	LFT	2018-09-27	SO-2017.1	0
SO_C_20180719_A_1654.JPG	2018-07-19 15:55:48	58.53628611	-136.13028611	214	Abundance	0	0	0	0	Good	LFT	2018-09-27	SO-2017.1	0
SO_C_20180719_A_1655.JPG	2018-07-19 15:55:49	58.53626944	-136.12946389	214	Abundance	0	0	0	0	Good	LFT	2018-09-27	SO-2017.1	0
SO_C_20180719_A_1656.JPG	2018-07-19 15:55:50	58.53625833	-136.12864444	214	Abundance	0	0	0	0	Good	LFT	2018-09-27	SO-2017.1	0
SO_C_20180719_A_1657.JPG	2018-07-19 15:55:51	58.53624722	-136.12782222	214	Abundance	0	0	0	0	Good	LFT	2018-09-27	SO-2017.1	0
SO_C_20180719_A_1658.JPG	2018-07-19 15:55:52	58.53624167	-136.12700556	214	Abundance	0	0	0	0	Good	LFT	2018-09-27	SO-2017.1	0
SO_C_20180719_A_1659.JPG	2018-07-19 15:55:53	58.53623611	-136.12618611	215	Abundance	0	0	0	0	Good	LFT	2018-09-27	SO-2017.1	0
SO_C_20180719_A_1660.JPG	2018-07-19 15:55:54	58.53623611	-136.12536944	215	Abundance	0	0	0	0	Good	LFT	2018-09-27	SO-2017.1	0
SO_C_20180719_A_1661.JPG	2018-07-19 15:55:55	58.53623889	-136.12455278	216	Abundance	0	0	0	0	Good	LFT	2018-09-27	SO-2017.1	0
SO_C_20180719_A_1662.JPG	2018-07-19 15:55:56	58.53624167	-136.12373333	217	Abundance	0	0	0	0	Good	LFT	2018-09-27	SO-2017.1	0
SO_C_20180719_A_1663.JPG	2018-07-19 15:55:57	58.53624722	-136.12291389	217	Abundance	0	0	0	0	Good	LFT	2018-09-27	SO-2017.1	0
SO_C_20180719_A_1664.JPG	2018-07-19 15:55:58	58.53625833	-136.12209722	218	Abundance	0	0	0	0	Good	LFT	2018-09-27	SO-2017.1	0
SO_C_20180719_A_1665.JPG	2018-07-19 15:55:59	58.53627222	-136.12127778	218	Abundance	0	0	0	0	Good	LFT	2018-09-27	SO-2017.1	0
SO_C_20180719_A_1666.JPG	2018-07-19 15:56:00	58.53628611	-136.12045833	219	Abundance	0	0	0	0	Good	LFT	2018-09-27	SO-2017.1	0
SO_C_20180719_A_1667.JPG	2018-07-19 15:56:01	58.53629722	-136.11963611	219	Abundance	0	0	0	0	Good	LFT	2018-09-27	SO-2017.1	0
SO_C_20180719_A_1668.JPG	2018-07-19 15:56:02	58.53631111	-136.11881111	220	Abundance	0	0	0	0	Good	LFT	2018-09-27	SO-2017.1	0
SO_C_20180719_A_1669.JPG	2018-07-19 15:56:03	58.53632500	-136.11798889	220	Abundance	0	0	0	0	Good	LFT	2018-09-27	SO-2017.1	0
SO_C_20180719_A_1670.JPG	2018-07-19 15:56:04	58.53633889	-136.11716389	220	Abundance	0	0	0	0	Good	LFT	2018-09-27	SO-2017.1	0
SO_C_20180719_A_1671.JPG	2018-07-19 15:56:05	58.53635000	-136.11633889	220	Abundance	0	0	0	0	Good	LFT	2018-09-27	SO-2017.1	0
SO_C_20180719_A_1672.JPG	2018-07-19 15:56:06	58.53636389	-136.11551667	220	Abundance	0	0	0	0	Good	LFT	2018-09-27	SO-2017.1	0
SO_C_20180719_A_1673.JPG	2018-07-19 15:56:07	58.53637500	-136.11469167	220	Abundance	0	0	0	0	Good	LFT	2018-09-27	SO-2017.1	0
SO_C_20180719_A_1674.JPG	2018-07-19 15:56:08	58.53638611	-136.11386944	221	Abundance	0	0	0	0	Good	LFT	2018-09-27	SO-2017.1	0
SO_C_20180719_A_1675.JPG	2018-07-19 15:56:09	58.53639722	-136.11304444	221	Abundance	0	0	0	0	Good	LFT	2018-09-27	SO-2017.1	0
SO_C_20180719_A_1676.JPG	2018-07-19 15:56:10	58.53640833	-136.11222222	221	Abundance	0	0	1	0	Good	LFT	2018-09-27	SO-2017.1	0
SO_C_20180719_A_1677.JPG	2018-07-19 15:56:11	58.53641944	-136.11139444	221	Abundance	0	0	1	0	Good	LFT	2018-09-27	SO-2017.1	0
SO_C_20180719_A_1678.JPG	2018-07-19 15:56:12	58.53643056	-136.11056667	222	Abundance	0	0	0	0	Good	LFT	2018-09-27	SO-2017.1	0
SO_C_20180719_A_1679.JPG	2018-07-19 15:56:13	58.53644167	-136.10974167	222	Abundance	0	0	0	0	Good	LFT	2018-09-27	SO-2017.1	0
SO_C_20180719_A_1680.JPG	2018-07-19 15:56:14	58.53645000	-136.10891389	222	Abundance	0	0	0	0	Good	LFT	2018-09-27	SO-2017.1	0
SO_C_20180719_A_1681.JPG	2018-07-19 15:56:15	58.53645556	-136.10808611	223	Abundance	0	0	0	0	Good	LFT	2018-09-27	SO-2017.1	0
SO_C_20180719_A_1682.JPG	2018-07-19 15:56:16	58.53646111	-136.10725556	223	Abundance	0	0	0	0	Good	LFT	2018-09-27	SO-2017.1	0
SO_C_20180719_A_1683.JPG	2018-07-19 15:56:17	58.53646389	-136.10642500	223	Abundance	0	0	0	0	Good	LFT	2018-09-27	SO-2017.1	0
SO_C_20180719_A_1684.JPG	2018-07-19 15:56:18	58.53646944	-136.10558889	223	Abundance	0	0	0	0	Good	LFT	2018-09-27	SO-2017.1	0
SO_C_20180719_A_1685.JPG	2018-07-19 15:56:19	58.53647500	-136.10475000	223	Abundance	0	0	0	0	Good	LFT	2018-09-27	SO-2017.1	0
SO_C_20180719_A_1686.JPG	2018-07-19 15:56:20	58.53647778	-136.10391111	223	Abundance	0	0	0	0	Good	LFT	2018-09-27	SO-2017.1	0
SO_C_20180719_A_1687.JPG	2018-07-19 15:56:21	58.53648056	-136.10306944	223	Abundance	0	0	0	0	Good	LFT	2018-09-27	SO-2017.1	0
SO_C_20180719_A_1688.JPG	2018-07-19 15:56:22	58.53648056	-136.10222500	223	Abundance	0	0	0	0	Good	LFT	2018-09-27	SO-2017.1	0
SO_C_20180719_A_1689.JPG	2018-07-19 15:56:23	58.53648333	-136.10137778	223	Abundance	0	0	0	0	Good	LFT	2018-09-27	SO-2017.1	0
SO_C_20180719_A_1690.JPG	2018-07-19 15:56:24	58.53648611	-136.10052778	223	Abundance	0	0	0	0	Good	LFT	2018-09-27	SO-2017.1	0
SO_C_20180719_A_1691.JPG	2018-07-19 15:56:25	58.53648611	-136.09967500	222	Abundance	0	0	0	0	Good	LFT	2018-09-27	SO-2017.1	0
SO_C_20180719_A_1692.JPG	2018-07-19 15:56:26	58.53648889	-136.09882500	222	Abundance	0	0	0	0	Good	LFT	2018-09-27	SO-2017.1	0
SO_C_20180719_A_1693.JPG	2018-07-19 15:56:27	58.53649167	-136.09797222	221	Abundance	0	0	0	0	Good	LFT	2018-09-27	SO-2017.1	0
SO_C_20180719_A_1694.JPG	2018-07-19 15:56:28	58.53649167	-136.09711667	221	Abundance	0	0	0	0	Good	LFT	2018-09-27	SO-2017.1	0
SO_C_20180719_A_1695.JPG	2018-07-19 15:56:29	58.53649722	-136.09626667	220	Abundance	0	0	0	0	Good	LFT	2018-09-27	SO-2017.1	0
SO_C_20180719_A_1696.JPG	2018-07-19 15:56:30	58.53650556	-136.09541667	219	Abundance	0	0	0	0	Good	LFT	2018-09-27	SO-2017.1	0
SO_C_20180719_A_1697.JPG	2018-07-19 15:56:31	58.53651667	-136.09456667	219	Abundance	0	0	0	0	Good	LFT	2018-09-27	SO-2017.1	0
SO_C_20180719_A_1698.JPG	2018-07-19 15:56:32	58.53653333	-136.09372222	218	Abundance	0	0	0	0	Good	LFT	2018-09-27	SO-2017.1	0
SO_C_20180719_A_1699.JPG	2018-07-19 15:56:33	58.53655278	-136.09287500	218	Abundance	0	0	0	0	Good	LFT	2018-09-27	SO-2017.1	0
SO_C_20180719_A_1700.JPG	2018-07-19 15:56:34	58.53657500	-136.09203056	218	Abundance	0	0	0	0	Good	LFT	2018-09-27	SO-2017.1	0
SO_C_20180719_A_1701.JPG	2018-07-19 15:56:35	58.53660278	-136.09118889	218	Abundance	0	0	0	0	Good	LFT	2018-09-27	SO-2017.1	0
SO_C_20180719_A_1702.JPG	2018-07-19 15:56:36	58.53663056	-136.09034722	218	Abundance	0	0	0	0	Good	LFT	2018-09-27	SO-2017.1	0
SO_C_20180719_A_1703.JPG	2018-07-19 15:56:37	58.53665833	-136.08950833	218	Abundance	0	0	0	0	Good	LFT	2018-09-27	SO-2017.1	0
SO_C_20180719_A_1704.JPG	2018-07-19 15:56:38	58.53668889	-136.08866944	218	Abundance	0	0	0	0	Good	LFT	2018-09-27	SO-2017.1	0
SO_C_20180719_A_1705.JPG	2018-07-19 15:56:39	58.53671667	-136.08783333	219	Abundance	0	0	0	0	Good	LFT	2018-09-27	SO-2017.1	0
SO_C_20180719_A_1706.JPG	2018-07-19 15:56:40	58.53674444	-136.08699444	219	Abundance	0	0	0	0	Good	LFT	2018-09-27	SO-2017.1	0
SO_C_20180719_A_1707.JPG	2018-07-19 15:56:41	58.53676667	-136.08615833	219	Abundance	0	0	0	0	Good	LFT	2018-09-27	SO-2017.1	0
SO_C_20180719_A_1708.JPG	2018-07-19 15:56:42	58.53678611	-136.08531944	219	Abundance	0	0	0	0	Good	LFT	2018-09-27	SO-2017.1	0
SO_C_20180719_A_1709.JPG	2018-07-19 15:56:43	58.53680556	-136.08448056	220	Abundance	0	0	0	0	Good	LFT	2018-09-27	SO-2017.1	0
SO_C_20180719_A_1710.JPG	2018-07-19 15:56:44	58.53681667	-136.08364444	220	Abundance	0	0	0	0	Good	LFT	2018-09-27	SO-2017.1	0
SO_C_20180719_A_1711.JPG	2018-07-19 15:56:45	58.53682222	-136.08280556	220	Abundance	0	0	0	0	Good	LFT	2018-09-27	SO-2017.1	0
SO_C_20180719_A_1712.JPG	2018-07-19 15:56:46	58.53682500	-136.08196944	220	Abundance	0	0	0	0	Good	LFT	2018-09-27	SO-2017.1	0
SO_C_20180719_A_1713.JPG	2018-07-19 15:56:47	58.53682500	-136.08113333	220	Abundance	0	0	0	0	Good	LFT	2018-09-27	SO-2017.1	0
SO_C_20180719_A_1714.JPG	2018-07-19 15:56:48	58.53681944	-136.08029722	220	Abundance	0	0	0	0	Good	LFT	2018-09-27	SO-2017.1	0
SO_C_20180719_A_1715.JPG	2018-07-19 15:56:49	58.53681389	-136.07946111	221	Abundance	0	0	0	0	Good	LFT	2018-09-27	SO-2017.1	0
SO_C_20180719_A_1716.JPG	2018-07-19 15:56:50	58.53680556	-136.07862500	220	Abundance	0	0	0	0	Good	LFT	2018-09-27	SO-2017.1	0
SO_C_20180719_A_1717.JPG	2018-07-19 15:56:51	58.53679722	-136.07778333	220	Abundance	0	0	0	0	Good	LFT	2018-09-27	SO-2017.1	0
SO_C_20180719_A_1718.JPG	2018-07-19 15:56:52	58.53678611	-136.07694167	220	Abundance	0	0	0	0	Good	LFT	2018-09-27	SO-2017.1	0
SO_C_20180719_A_1719.JPG	2018-07-19 15:56:53	58.53677778	-136.07609444	220	Abundance	0	0	0	0	Good	LFT	2018-09-27	SO-2017.1	0
SO_C_20180719_A_1720.JPG	2018-07-19 15:56:54	58.53676667	-136.07525000	220	Abundance	0	0	0	0	Good	LFT	2018-09-27	SO-2017.1	0
SO_C_20180719_A_1721.JPG	2018-07-19 15:56:55	58.53675556	-136.07440000	220	Abundance	0	0	0	0	Good	LFT	2018-09-27	SO-2017.1	0
SO_C_20180719_A_1722.JPG	2018-07-19 15:56:56	58.53674444	-136.07355278	219	Abundance	0	0	0	0	Good	LFT	2018-09-27	SO-2017.1	0
SO_C_20180719_A_1723.JPG	2018-07-19 15:56:57	58.53673333	-136.07270556	219	Abundance	0	0	0	0	Good	LFT	2018-09-27	SO-2017.1	0
SO_C_20180719_A_1724.JPG	2018-07-19 15:56:58	58.53672500	-136.07185556	219	Abundance	0	0	0	0	Good	LFT	2018-09-27	SO-2017.1	0
SO_C_20180719_A_1725.JPG	2018-07-19 15:56:59	58.53671111	-136.07100833	219	Abundance	0	0	0	0	Good	LFT	2018-09-27	SO-2017.1	0
SO_C_20180719_A_1726.JPG	2018-07-19 15:57:00	58.53670000	-136.07016111	219	Abundance	0	0	0	0	Good	LFT	2018-09-27	SO-2017.1	0
SO_C_20180719_A_1727.JPG	2018-07-19 15:57:01	58.53669444	-136.06931944	218	Abundance	0	0	0	0	Good	LFT	2018-09-27	SO-2017.1	0
SO_C_20180719_A_1728.JPG	2018-07-19 15:57:02	58.53668889	-136.06848056	218	Abundance	0	0	0	0	Good	LFT	2018-09-27	SO-2017.1	0
SO_C_20180719_A_1729.JPG	2018-07-19 15:57:03	58.53668333	-136.06764167	218	Abundance	0	0	0	0	Good	LFT	2018-09-27	SO-2017.1	0
SO_C_20180719_A_1730.JPG	2018-07-19 15:57:04	58.53667778	-136.06680000	218	Abundance	0	0	0	0	Good	LFT	2018-09-27	SO-2017.1	0
SO_C_20180719_A_1731.JPG	2018-07-19 15:57:05	58.53667500	-136.06596111	218	Abundance	0	0	0	0	Good	LFT	2018-09-27	SO-2017.1	0
SO_C_20180719_A_1732.JPG	2018-07-19 15:57:06	58.53667500	-136.06512222	217	Abundance	0	0	0	0	Good	LFT	2018-09-27	SO-2017.1	0
SO_C_20180719_A_1733.JPG	2018-07-19 15:57:07	58.53668056	-136.06428333	217	Abundance	0	0	0	0	Good	LFT	2018-09-27	SO-2017.1	0
SO_C_20180719_A_1734.JPG	2018-07-19 15:57:08	58.53668611	-136.06344722	217	Abundance	0	0	0	0	Good	LFT	2018-09-27	SO-2017.1	0
SO_C_20180719_A_1735.JPG	2018-07-19 15:57:09	58.53670000	-136.06261111	218	Abundance	0	0	0	0	Good	LFT	2018-09-27	SO-2017.1	0
SO_C_20180719_A_1736.JPG	2018-07-19 15:57:10	58.53671389	-136.06177778	219	Abundance	0	0	0	0	Good	LFT	2018-09-27	SO-2017.1	0
SO_C_20180719_A_1737.JPG	2018-07-19 15:57:11	58.53672778	-136.06094444	220	Abundance	0	0	0	0	Good	LFT	2018-09-27	SO-2017.1	0
SO_C_20180719_A_1738.JPG	2018-07-19 15:57:12	58.53674444	-136.06010833	221	Abundance	0	0	0	0	Good	LFT	2018-09-27	SO-2017.1	0
SO_C_20180719_A_1739.JPG	2018-07-19 15:57:13	58.53676389	-136.05927500	222	Abundance	0	0	0	0	Good	LFT	2018-09-27	SO-2017.1	0
SO_C_20180719_A_1740.JPG	2018-07-19 15:57:14	58.53678333	-136.05843889	222	Abundance	0	0	0	0	Good	LFT	2018-09-27	SO-2017.1	0
SO_C_20180719_A_1741.JPG	2018-07-19 15:57:15	58.53680556	-136.05760278	222	Abundance	0	0	0	0	Good	LFT	2018-09-27	SO-2017.1	0
SO_C_20180719_A_1742.JPG	2018-07-19 15:57:16	58.53682500	-136.05676111	222	Abundance	0	0	0	0	Good	LFT	2018-09-27	SO-2017.1	0
SO_C_20180719_A_1743.JPG	2018-07-19 15:57:17	58.53684722	-136.05591667	222	Abundance	0	0	0	0	Good	LFT	2018-09-27	SO-2017.1	0
SO_C_20180719_A_1744.JPG	2018-07-19 15:57:18	58.53686667	-136.05506389	222	Abundance	0	0	0	0	Good	LFT	2018-09-27	SO-2017.1	0
SO_C_20180719_A_1745.JPG	2018-07-19 15:57:19	58.53688333	-136.05421111	222	Abundance	0	0	0	0	Good	LFT	2018-09-27	SO-2017.1	0
SO_C_20180719_A_1746.JPG	2018-07-19 15:57:20	58.53689722	-136.05335556	222	Abundance	0	0	0	0	Good	LFT	2018-09-27	SO-2017.1	0
SO_C_20180719_A_1747.JPG	2018-07-19 15:57:21	58.53691389	-136.05249444	222	Abundance	0	0	0	0	Good	LFT	2018-09-27	SO-2017.1	0
SO_C_20180719_A_1748.JPG	2018-07-19 15:57:22	58.53692500	-136.05163611	221	Abundance	0	0	0	0	Good	LFT	2018-09-27	SO-2017.1	0
SO_C_20180719_A_1749.JPG	2018-07-19 15:57:23	58.53693889	-136.05077500	220	Abundance	0	0	0	0	Good	LFT	2018-09-27	SO-2017.1	0
SO_C_20180719_A_1750.JPG	2018-07-19 15:57:24	58.53694722	-136.04991389	220	Abundance	0	0	0	0	Good	LFT	2018-09-27	SO-2017.1	0
SO_C_20180719_A_1751.JPG	2018-07-19 15:57:25	58.53695278	-136.04905833	219	Abundance	0	0	1	0	Good	LFT	2018-09-27	SO-2017.1	0
SO_C_20180719_A_1752.JPG	2018-07-19 15:57:26	58.53696111	-136.04820556	218	Abundance	0	0	0	0	Good	LFT	2018-09-27	SO-2017.1	0
SO_C_20180719_A_1753.JPG	2018-07-19 15:57:27	58.53696667	-136.04735556	218	Abundance	0	0	0	0	Good	LFT	2018-09-27	SO-2017.1	0
SO_C_20180719_A_1754.JPG	2018-07-19 15:57:28	58.53696944	-136.04650278	218	Abundance	0	0	0	0	Good	LFT	2018-09-27	SO-2017.1	0
SO_C_20180719_A_1755.JPG	2018-07-19 15:57:29	58.53697222	-136.04565278	217	Abundance	0	0	0	0	Good	LFT	2018-09-27	SO-2017.1	0
SO_C_20180719_A_1756.JPG	2018-07-19 15:57:30	58.53697500	-136.04480833	218	Abundance	0	0	0	0	Good	LFT	2018-09-27	SO-2017.1	0
SO_C_20180719_A_1757.JPG	2018-07-19 15:57:31	58.53697778	-136.04396389	218	Abundance	0	0	0	0	Good	LFT	2018-09-27	SO-2017.1	0
SO_C_20180719_A_1758.JPG	2018-07-19 15:57:32	58.53698056	-136.04312222	218	Abundance	0	0	0	0	Good	LFT	2018-09-27	SO-2017.1	0
SO_C_20180719_A_1759.JPG	2018-07-19 15:57:33	58.53698056	-136.04228056	219	Abundance	0	0	0	0	Good	LFT	2018-09-27	SO-2017.1	0
SO_C_20180719_A_1760.JPG	2018-07-19 15:57:34	58.53698333	-136.04144167	219	Abundance	0	0	0	0	Good	LFT	2018-09-27	SO-2017.1	0
SO_C_20180719_A_1761.JPG	2018-07-19 15:57:35	58.53698889	-136.04060000	220	Abundance	0	0	0	0	Good	LFT	2018-09-27	SO-2017.1	0
SO_C_20180719_A_1762.JPG	2018-07-19 15:57:36	58.53699167	-136.03976111	220	Abundance	0	0	0	0	Good	LFT	2018-09-27	SO-2017.1	0
SO_C_20180719_A_1763.JPG	2018-07-19 15:57:37	58.53699722	-136.03892500	220	Abundance	0	0	0	0	Good	LFT	2018-09-27	SO-2017.1	0
SO_C_20180719_A_1764.JPG	2018-07-19 15:57:38	58.53700000	-136.03808611	221	Abundance	0	0	0	0	Good	LFT	2018-09-27	SO-2017.1	0
SO_C_20180719_A_1765.JPG	2018-07-19 15:57:39	58.53700278	-136.03725000	221	Abundance	0	0	0	0	Good	LFT	2018-09-27	SO-2017.1	0
SO_C_20180719_A_1766.JPG	2018-07-19 15:57:40	58.53700556	-136.03641111	222	Abundance	0	0	0	0	Good	LFT	2018-09-27	SO-2017.1	0
SO_C_20180719_A_1767.JPG	2018-07-19 15:57:41	58.53700833	-136.03557500	222	Abundance	0	0	0	0	Good	LFT	2018-09-27	SO-2017.1	0
SO_C_20180719_A_1768.JPG	2018-07-19 15:57:42	58.53701389	-136.03473611	222	Abundance	0	0	0	0	Good	LFT	2018-09-27	SO-2017.1	0
SO_C_20180719_A_1769.JPG	2018-07-19 15:57:43	58.53701944	-136.03389722	223	Abundance	0	0	0	0	Good	LFT	2018-09-27	SO-2017.1	0
SO_C_20180719_A_1770.JPG	2018-07-19 15:57:44	58.53702500	-136.03305833	223	Abundance	0	0	0	0	Good	LFT	2018-09-27	SO-2017.1	0
SO_C_20180719_A_1771.JPG	2018-07-19 15:57:45	58.53703333	-136.03221944	224	Abundance	0	0	0	0	Good	LFT	2018-09-27	SO-2017.1	0
SO_C_20180719_A_1772.JPG	2018-07-19 15:57:46	58.53704167	-136.03137778	224	Abundance	0	0	0	0	Good	LFT	2018-09-27	SO-2017.1	0
SO_C_20180719_A_1773.JPG	2018-07-19 15:57:47	58.53705000	-136.03053611	225	Abundance	0	0	0	0	Good	LFT	2018-09-27	SO-2017.1	0
SO_C_20180719_A_1774.JPG	2018-07-19 15:57:48	58.53705833	-136.02968889	225	Abundance	0	0	0	0	Good	LFT	2018-09-27	SO-2017.1	0
SO_C_20180719_A_1775.JPG	2018-07-19 15:57:49	58.53706667	-136.02883889	225	Abundance	0	0	0	0	Good	LFT	2018-09-27	SO-2017.1	0
SO_C_20180719_A_1776.JPG	2018-07-19 15:57:50	58.53707222	-136.02798056	225	Abundance	0	0	0	0	Good	LFT	2018-09-27	SO-2017.1	0
SO_C_20180719_A_1777.JPG	2018-07-19 15:57:51	58.53707500	-136.02712222	225	Abundance	0	0	0	0	Good	LFT	2018-09-27	SO-2017.1	0
SO_C_20180719_A_1778.JPG	2018-07-19 15:57:52	58.53707778	-136.02626111	225	Abundance	0	0	0	0	Good	LFT	2018-09-27	SO-2017.1	0
SO_C_20180719_A_1779.JPG	2018-07-19 15:57:53	58.53708056	-136.02540000	224	Abundance	0	0	0	0	Good	LFT	2018-09-27	SO-2017.1	0
SO_C_20180719_A_1780.JPG	2018-07-19 15:57:54	58.53708611	-136.02453889	223	Abundance	0	0	0	0	Good	LFT	2018-09-27	SO-2017.1	0
SO_C_20180719_A_1781.JPG	2018-07-19 15:57:55	58.53708889	-136.02367778	223	Abundance	0	0	0	0	Good	LFT	2018-09-27	SO-2017.1	0
SO_C_20180719_A_1782.JPG	2018-07-19 15:57:56	58.53709167	-136.02281944	222	Abundance	0	0	0	0	Good	LFT	2018-09-27	SO-2017.1	0
SO_C_20180719_A_1783.JPG	2018-07-19 15:57:57	58.53709722	-136.02196667	221	Abundance	0	0	0	0	Good	LFT	2018-09-27	SO-2017.1	0
SO_C_20180719_A_1784.JPG	2018-07-19 15:57:58	58.53710278	-136.02111389	221	Abundance	0	0	0	0	Good	LFT	2018-09-27	SO-2017.1	0
SO_C_20180719_A_1785.JPG	2018-07-19 15:57:59	58.53711111	-136.02026389	220	Abundance	0	0	0	0	Good	LFT	2018-09-27	SO-2017.1	0
SO_C_20180719_A_1786.JPG	2018-07-19 15:58:00	58.53712222	-136.01941389	220	Abundance	0	0	0	0	Good	LFT	2018-09-27	SO-2017.1	0
SO_C_20180719_A_1787.JPG	2018-07-19 15:58:01	58.53713333	-136.01856667	219	Abundance	0	0	0	0	Good	LFT	2018-09-27	SO-2017.1	0
SO_C_20180719_A_1788.JPG	2018-07-19 15:58:02	58.53714722	-136.01771944	219	Abundance	0	0	0	0	Good	LFT	2018-09-27	SO-2017.1	0
SO_C_20180719_A_1789.JPG	2018-07-19 15:58:03	58.53715833	-136.01687222	219	Abundance	0	0	0	0	Good	LFT	2018-09-27	SO-2017.1	0
SO_C_20180719_A_1790.JPG	2018-07-19 15:58:04	58.53717222	-136.01602500	218	Abundance	0	0	0	0	Good	LFT	2018-09-27	SO-2017.1	0
SO_C_20180719_A_1791.JPG	2018-07-19 15:58:05	58.53718889	-136.01517222	218	Abundance	0	0	0	0	Good	LFT	2018-09-27	SO-2017.1	0
SO_C_20180719_A_1792.JPG	2018-07-19 15:58:06	58.53720556	-136.01431944	218	Abundance	0	0	0	0	Good	LFT	2018-09-27	SO-2017.1	0
SO_C_20180719_A_1793.JPG	2018-07-19 15:58:07	58.53722500	-136.01346667	217	Abundance	0	0	0	0	Good	LFT	2018-09-27	SO-2017.1	0
SO_C_20180719_A_1794.JPG	2018-07-19 15:58:08	58.53724444	-136.01261111	217	Abundance	0	0	0	0	Good	LFT	2018-09-27	SO-2017.1	0
SO_C_20180719_A_1795.JPG	2018-07-19 15:58:09	58.53726111	-136.01175556	217	Abundance	0	0	0	0	Good	LFT	2018-09-27	SO-2017.1	0
SO_C_20180719_A_1796.JPG	2018-07-19 15:58:10	58.53728333	-136.01089722	216	Abundance	0	0	0	0	Good	LFT	2018-09-27	SO-2017.1	0
SO_C_20180719_A_1797.JPG	2018-07-19 15:58:11	58.53730278	-136.01004167	216	Abundance	0	0	0	0	Good	LFT	2018-09-27	SO-2017.1	0
SO_C_20180719_A_1798.JPG	2018-07-19 15:58:12	58.53731944	-136.00918611	216	Abundance	0	0	0	0	Good	LFT	2018-09-27	SO-2017.1	0
SO_C_20180719_A_1799.JPG	2018-07-19 15:58:13	58.53733889	-136.00833333	216	Abundance	0	0	0	0	Good	LFT	2018-09-27	SO-2017.1	0
SO_C_20180719_A_1800.JPG	2018-07-19 15:58:14	58.53736111	-136.00747778	216	Abundance	0	0	0	0	Good	LFT	2018-09-27	SO-2017.1	0
SO_C_20180719_A_1801.JPG	2018-07-19 15:58:15	58.53738889	-136.00662500	216	Abundance	0	0	0	0	Good	LFT	2018-09-27	SO-2017.1	0
SO_C_20180719_A_1802.JPG	2018-07-19 15:58:16	58.53741389	-136.00577500	216	Abundance	0	0	0	0	Good	LFT	2018-09-27	SO-2017.1	0
SO_C_20180719_A_1803.JPG	2018-07-19 15:58:17	58.53743889	-136.00492500	216	Abundance	0	0	0	0	Good	LFT	2018-09-27	SO-2017.1	0
SO_C_20180719_A_1804.JPG	2018-07-19 15:58:18	58.53745833	-136.00408056	217	Abundance	0	0	0	0	Good	LFT	2018-09-27	SO-2017.1	0
SO_C_20180719_A_1805.JPG	2018-07-19 15:58:19	58.53747500	-136.00323611	217	Abundance	0	0	0	0	Good	LFT	2018-09-27	SO-2017.1	0
SO_C_20180719_A_1806.JPG	2018-07-19 15:58:20	58.53749167	-136.00239722	218	Abundance	0	0	0	0	Good	LFT	2018-09-27	SO-2017.1	0
SO_C_20180719_A_1807.JPG	2018-07-19 15:58:21	58.53750556	-136.00156111	219	Abundance	0	0	0	0	Good	LFT	2018-09-27	SO-2017.1	0
SO_C_20180719_A_1808.JPG	2018-07-19 15:58:22	58.53752222	-136.00072778	219	Abundance	0	0	0	0	Good	LFT	2018-09-27	SO-2017.1	0
SO_C_20180719_A_1809.JPG	2018-07-19 15:58:23	58.53753611	-135.99989444	220	Abundance	0	0	0	0	Good	LFT	2018-09-27	SO-2017.1	0
SO_C_20180719_A_1810.JPG	2018-07-19 15:58:24	58.53755000	-135.99906111	220	Abundance	0	0	0	0	Good	LFT	2018-09-27	SO-2017.1	0
SO_C_20180719_A_1811.JPG	2018-07-19 15:58:25	58.53756111	-135.99823056	221	Abundance	0	0	0	0	Good	LFT	2018-09-27	SO-2017.1	0
SO_C_20180719_A_1812.JPG	2018-07-19 15:58:26	58.53756944	-135.99740278	221	Abundance	0	0	0	0	Good	LFT	2018-09-27	SO-2017.1	0
SO_C_20180719_A_1813.JPG	2018-07-19 15:58:27	58.53757778	-135.99657500	221	Abundance	0	0	0	0	Good	LFT	2018-09-27	SO-2017.1	0
SO_C_20180719_A_1814.JPG	2018-07-19 15:58:28	58.53758611	-135.99574722	221	Abundance	0	0	0	0	Good	LFT	2018-09-27	SO-2017.1	0
SO_C_20180719_A_1815.JPG	2018-07-19 15:58:29	58.53759167	-135.99491944	221	Abundance	0	0	0	0	Good	LFT	2018-09-27	SO-2017.1	0
SO_C_20180719_A_1816.JPG	2018-07-19 15:58:30	58.53760000	-135.99409167	221	Abundance	0	0	0	0	Good	LFT	2018-09-27	SO-2017.1	0
SO_C_20180719_A_1817.JPG	2018-07-19 15:58:31	58.53760556	-135.99326111	221	Abundance	0	0	0	0	Good	LFT	2018-09-27	SO-2017.1	0
SO_C_20180719_A_1818.JPG	2018-07-19 15:58:32	58.53760833	-135.99243056	220	Abundance	0	0	0	0	Good	LFT	2018-09-27	SO-2017.1	0
SO_C_20180719_A_1819.JPG	2018-07-19 15:58:33	58.53760278	-135.99160000	220	Abundance	0	0	0	0	Good	LFT	2018-09-27	SO-2017.1	0
SO_C_20180719_A_1820.JPG	2018-07-19 15:58:34	58.53759167	-135.99076944	219	Abundance	0	0	0	0	Good	LFT	2018-09-27	SO-2017.1	0
SO_C_20180719_A_1821.JPG	2018-07-19 15:58:35	58.53757222	-135.98993889	219	Abundance	0	0	0	0	Good	LFT	2018-09-27	SO-2017.1	0
SO_C_20180719_A_1822.JPG	2018-07-19 15:58:36	58.53754444	-135.98910833	218	Abundance	0	0	0	0	Good	LFT	2018-09-27	SO-2017.1	0
SO_C_20180719_A_1823.JPG	2018-07-19 15:58:37	58.53751111	-135.98827500	218	Abundance	0	0	0	0	Good	LFT	2018-09-27	SO-2017.1	0
SO_C_20180719_A_1824.JPG	2018-07-19 15:58:38	58.53747778	-135.98743889	217	Abundance	0	0	0	0	Good	LFT	2018-09-27	SO-2017.1	0
SO_C_20180719_A_1825.JPG	2018-07-19 15:58:39	58.53744167	-135.98661111	216	Abundance	0	0	0	0	Good	LFT	2018-09-27	SO-2017.1	0
SO_C_20180719_A_1826.JPG	2018-07-19 15:58:40	58.53741111	-135.98578056	215	Abundance	0	0	0	0	Good	LFT	2018-09-27	SO-2017.1	0
SO_C_20180719_A_1827.JPG	2018-07-19 15:58:41	58.53738611	-135.98495278	215	Abundance	0	0	0	0	Good	LFT	2018-09-27	SO-2017.1	0
SO_C_20180719_A_1828.JPG	2018-07-19 15:58:42	58.53736389	-135.98412778	214	Abundance	0	0	0	0	Good	LFT	2018-09-27	SO-2017.1	0
SO_C_20180719_A_1829.JPG	2018-07-19 15:58:43	58.53734722	-135.98330556	213	Abundance	0	0	0	0	Good	LFT	2018-09-27	SO-2017.1	0
SO_C_20180719_A_1830.JPG	2018-07-19 15:58:44	58.53733611	-135.98248333	213	Abundance	0	0	0	0	Good	LFT	2018-09-27	SO-2017.1	0
SO_C_20180719_A_1831.JPG	2018-07-19 15:58:45	58.53733056	-135.98166111	212	Abundance	0	0	0	0	Good	LFT	2018-09-27	SO-2017.1	0
SO_C_20180719_A_1832.JPG	2018-07-19 15:58:46	58.53732778	-135.98083889	212	Abundance	0	0	0	0	Good	LFT	2018-09-27	SO-2017.1	0
SO_C_20180719_A_1833.JPG	2018-07-19 15:58:47	58.53733056	-135.98001667	212	Abundance	0	0	0	0	Good	LFT	2018-09-27	SO-2017.1	0
SO_C_20180719_A_1834.JPG	2018-07-19 15:58:48	58.53733889	-135.97920000	213	Abundance	0	0	0	0	Good	LFT	2018-09-27	SO-2017.1	0
SO_C_20180719_A_1835.JPG	2018-07-19 15:58:49	58.53735000	-135.97838056	213	Abundance	0	0	0	0	Good	LFT	2018-09-27	SO-2017.1	0
SO_C_20180719_A_1836.JPG	2018-07-19 15:58:50	58.53736389	-135.97755833	213	Abundance	0	0	0	0	Good	LFT	2018-09-27	SO-2017.1	0
SO_C_20180719_A_1837.JPG	2018-07-19 15:58:51	58.53738333	-135.97673889	214	Abundance	0	0	0	0	Good	LFT	2018-09-27	SO-2017.1	0
SO_C_20180719_A_1838.JPG	2018-07-19 15:58:52	58.53740000	-135.97591944	214	Abundance	0	0	0	0	Good	LFT	2018-09-27	SO-2017.1	0
SO_C_20180719_A_1839.JPG	2018-07-19 15:58:53	58.53742222	-135.97509722	214	Abundance	0	0	0	0	Good	LFT	2018-09-27	SO-2017.1	0
SO_C_20180719_A_1840.JPG	2018-07-19 15:58:54	58.53744444	-135.97427500	214	Abundance	0	0	1	0	Good	LFT	2018-09-27	SO-2017.1	0
SO_C_20180719_A_1841.JPG	2018-07-19 15:58:55	58.53746667	-135.97345000	214	Abundance	0	0	1	0	Good	LFT	2018-09-27	SO-2017.1	0
SO_C_20180719_A_1842.JPG	2018-07-19 15:58:56	58.53748333	-135.97262500	214	Abundance	0	0	1	0	Good	LFT	2018-09-27	SO-2017.1	0
SO_C_20180719_A_1843.JPG	2018-07-19 15:58:57	58.53750000	-135.97179722	214	Abundance	0	0	1	0	Good	LFT	2018-09-27	SO-2017.1	0
SO_C_20180719_A_1844.JPG	2018-07-19 15:58:58	58.53751389	-135.97096667	213	Abundance	0	0	0	0	Good	LFT	2018-09-27	SO-2017.1	0
SO_C_20180719_A_1845.JPG	2018-07-19 15:58:59	58.53752222	-135.97013333	213	Abundance	0	0	0	0	Good	LFT	2018-09-27	SO-2017.1	0
SO_C_20180719_A_1846.JPG	2018-07-19 15:59:00	58.53752778	-135.96930000	212	Abundance	0	0	0	0	Good	LFT	2018-09-27	SO-2017.1	0
SO_C_20180719_A_1847.JPG	2018-07-19 15:59:01	58.53753056	-135.96846111	212	Abundance	0	0	0	0	Good	LFT	2018-09-27	SO-2017.1	0
SO_C_20180719_A_1848.JPG	2018-07-19 15:59:02	58.53753333	-135.96762778	211	Abundance	0	0	0	0	Good	LFT	2018-09-27	SO-2017.1	0
SO_C_20180719_A_1849.JPG	2018-07-19 15:59:03	58.53753611	-135.96679167	211	Abundance	0	0	0	0	Good	LFT	2018-09-27	SO-2017.1	0
SO_C_20180719_A_1850.JPG	2018-07-19 15:59:04	58.53753889	-135.96596111	210	Abundance	0	0	1	0	Good	LFT	2018-09-27	SO-2017.1	0
SO_C_20180719_A_1851.JPG	2018-07-19 15:59:05	58.53754722	-135.96513056	209	Abundance	0	0	1	0	Good	LFT	2018-09-27	SO-2017.1	0
SO_C_20180719_A_1852.JPG	2018-07-19 15:59:06	58.53755833	-135.96430556	209	Abundance	0	0	1	0	Good	LFT	2018-09-27	SO-2017.1	0
SO_C_20180719_A_1853.JPG	2018-07-19 15:59:07	58.53757222	-135.96348333	208	Abundance	0	0	1	0	Good	LFT	2018-09-27	SO-2017.1	0
SO_C_20180719_A_1854.JPG	2018-07-19 15:59:08	58.53758889	-135.96266111	208	Abundance	0	0	1	0	Good	LFT	2018-09-27	SO-2017.1	0
SO_C_20180719_A_1855.JPG	2018-07-19 15:59:09	58.53760556	-135.96184167	208	Abundance	0	0	1	0	Good	LFT	2018-09-27	SO-2017.1	0
SO_C_20180719_A_1856.JPG	2018-07-19 15:59:10	58.53761944	-135.96102222	208	Abundance	0	0	0	1	Good	LFT	2018-09-27	SO-2017.1	0
SO_C_20180719_A_1857.JPG	2018-07-19 15:59:11	58.53763611	-135.96020556	208	Abundance	0	0	0	1	Good	LFT	2018-09-27	SO-2017.1	0
SO_C_20180719_A_1858.JPG	2018-07-19 15:59:12	58.53765278	-135.95938889	208	Abundance	0	0	0	1	Good	LFT	2018-09-27	SO-2017.1	0
SO_C_20180719_A_1859.JPG	2018-07-19 15:59:13	58.53766944	-135.95857500	209	Abundance	0	0	0	1	Good	LFT	2018-09-27	SO-2017.1	0
SO_C_20180719_A_1860.JPG	2018-07-19 15:59:14	58.53768889	-135.95776111	209	Abundance	0	0	0	1	Good	LFT	2018-09-27	SO-2017.1	0
SO_C_20180719_A_1861.JPG	2018-07-19 15:59:15	58.53770833	-135.95694444	210	Abundance	0	0	0	1	Good	LFT	2018-09-27	SO-2017.1	0
SO_C_20180719_A_1862.JPG	2018-07-19 15:59:16	58.53772222	-135.95613056	210	Abundance	0	0	0	1	Good	LFT	2018-09-27	SO-2017.1	0
SO_C_20180719_A_1863.JPG	2018-07-19 15:59:17	58.53773889	-135.95531389	211	Abundance	0	0	0	1	Good	LFT	2018-09-27	SO-2017.1	0
SO_C_20180719_A_1864.JPG	2018-07-19 15:59:18	58.53775278	-135.95449167	211	Abundance	0	0	0	1	Good	LFT	2018-09-27	SO-2017.1	0
SO_C_20180719_A_1865.JPG	2018-07-19 15:59:19	58.53776389	-135.95366389	212	Abundance	0	0	0	1	Good	LFT	2018-09-27	SO-2017.1	0
SO_C_20180719_A_1866.JPG	2018-07-19 15:59:20	58.53777222	-135.95283611	212	Abundance	0	0	0	1	Good	LFT	2018-09-27	SO-2017.1	0
SO_C_20180719_A_1867.JPG	2018-07-19 15:59:21	58.53778056	-135.95200000	212	Abundance	0	0	0	1	Good	LFT	2018-09-27	SO-2017.1	0
SO_C_20180719_A_1868.JPG	2018-07-19 15:59:22	58.53778333	-135.95116389	212	Abundance	0	0	0	1	Good	LFT	2018-09-27	SO-2017.1	0
SO_C_20180719_A_1869.JPG	2018-07-19 15:59:23	58.53778056	-135.95032222	212	Abundance	0	0	0	1	Good	LFT	2018-09-27	SO-2017.1	0
SO_C_20180719_A_1870.JPG	2018-07-19 15:59:24	58.53777500	-135.94948056	212	Abundance	0	0	0	1	Good	LFT	2018-09-27	SO-2017.1	0
SO_C_20180719_A_1871.JPG	2018-07-19 15:59:25	58.53776667	-135.94863889	212	Abundance	0	0	0	1	Good	LFT	2018-09-27	SO-2017.1	0
SO_C_20180719_A_1872.JPG	2018-07-19 15:59:26	58.53775556	-135.94779722	212	Abundance	0	0	0	1	Good	LFT	2018-09-27	SO-2017.1	0
SO_C_20180719_A_1873.JPG	2018-07-19 15:59:27	58.53774444	-135.94695833	212	Abundance	0	0	0	1	Good	LFT	2018-09-27	SO-2017.1	0
SO_C_20180719_A_1874.JPG	2018-07-19 15:59:28	58.53773056	-135.94611944	212	Abundance	0	0	0	1	Good	LFT	2018-09-27	SO-2017.1	0
SO_C_20180719_A_1875.JPG	2018-07-19 15:59:29	58.53771944	-135.94528333	212	Abundance	0	0	0	1	Good	LFT	2018-09-27	SO-2017.1	0
SO_C_20180719_A_1876.JPG	2018-07-19 15:59:30	58.53770833	-135.94444722	212	Abundance	0	0	0	1	Good	LFT	2018-09-27	SO-2017.1	0
SO_C_20180719_A_1877.JPG	2018-07-19 15:59:31	58.53770000	-135.94361389	212	Abundance	0	0	1	1	Good	LFT	2018-09-27	SO-2017.1	0
SO_C_20180719_A_1878.JPG	2018-07-19 15:59:32	58.53769444	-135.94278333	212	Abundance	1	0	1	1	Good	LFT	2018-09-27	SO-2017.1	0
SO_C_20180719_A_1879.JPG	2018-07-19 15:59:33	58.53769167	-135.94195278	212	Abundance	0	0	0	0	Good	LFT	2018-09-27	SO-2017.1	0
SO_C_20180719_A_1880.JPG	2018-07-19 15:59:34	58.53768889	-135.94112222	213	Abundance	0	0	0	0	Good	LFT	2018-09-27	SO-2017.1	0
SO_C_20180719_A_1881.JPG	2018-07-19 15:59:35	58.53768333	-135.94028889	213	Abundance	0	0	1	1	Good	LFT	2018-09-27	SO-2017.1	0
SO_C_20180719_A_1882.JPG	2018-07-19 15:59:36	58.53768056	-135.93945556	214	Abundance	0	0	1	1	Good	LFT	2018-09-27	SO-2017.1	0
SO_C_20180719_A_1883.JPG	2018-07-19 15:59:37	58.53768056	-135.93862222	214	Abundance	0	0	1	1	Good	LFT	2018-09-27	SO-2017.1	0
SO_C_20180719_A_1884.JPG	2018-07-19 15:59:38	58.53768333	-135.93778889	214	Abundance	0	0	0	1	Good	LFT	2018-09-27	SO-2017.1	0
SO_C_20180719_A_1885.JPG	2018-07-19 15:59:39	58.53769444	-135.93695278	215	Abundance	0	0	1	1	Good	LFT	2018-09-27	SO-2017.1	0
SO_C_20180719_A_1886.JPG	2018-07-19 15:59:40	58.53770833	-135.93611389	215	Abundance	0	0	1	1	Good	LFT	2018-09-27	SO-2017.1	0
SO_C_20180719_A_1887.JPG	2018-07-19 15:59:41	58.53772500	-135.93527500	215	Abundance	0	0	1	0	Good	LFT	2018-09-27	SO-2017.1	0
SO_C_20180719_A_1888.JPG	2018-07-19 15:59:42	58.53773611	-135.93443889	216	Abundance	0	0	1	0	Good	LFT	2018-09-27	SO-2017.1	0
SO_C_20180719_A_1889.JPG	2018-07-19 15:59:43	58.53775000	-135.93360278	216	Abundance	0	0	1	0	Good	LFT	2018-09-27	SO-2017.1	0
SO_C_20180719_A_1890.JPG	2018-07-19 15:59:44	58.53776111	-135.93276667	217	Abundance	0	0	1	0	Good	LFT	2018-09-27	SO-2017.1	0
SO_C_20180719_A_1891.JPG	2018-07-19 15:59:45	58.53777500	-135.93193333	217	Abundance	0	0	0	0	Good	LFT	2018-09-27	SO-2017.1	0
SO_C_20180719_A_1892.JPG	2018-07-19 15:59:46	58.53778611	-135.93110000	218	Abundance	0	0	0	0	Good	LFT	2018-09-27	SO-2017.1	0
SO_C_20180719_A_1893.JPG	2018-07-19 15:59:47	58.53780000	-135.93026667	218	Abundance	0	0	0	0	Good	LFT	2018-09-27	SO-2017.1	0
SO_C_20180719_A_1894.JPG	2018-07-19 15:59:48	58.53781111	-135.92943333	218	Abundance	0	0	0	0	Good	LFT	2018-09-27	SO-2017.1	0
SO_C_20180719_A_1895.JPG	2018-07-19 15:59:49	58.53782500	-135.92859722	218	Abundance	0	0	0	0	Good	LFT	2018-09-27	SO-2017.1	0
SO_C_20180719_A_1896.JPG	2018-07-19 15:59:50	58.53783611	-135.92775833	218	Abundance	0	0	1	0	Good	LFT	2018-09-27	SO-2017.1	0
SO_C_20180719_A_1897.JPG	2018-07-19 15:59:51	58.53784722	-135.92691944	219	Abundance	0	0	0	0	Good	LFT	2018-09-27	SO-2017.1	0
SO_C_20180719_A_1898.JPG	2018-07-19 15:59:52	58.53785833	-135.92607778	219	Abundance	0	0	1	0	Good	LFT	2018-09-27	SO-2017.1	0
SO_C_20180719_A_1899.JPG	2018-07-19 15:59:53	58.53786944	-135.92523333	219	Abundance	0	0	1	0	Good	LFT	2018-09-27	SO-2017.1	0
SO_C_20180719_A_1900.JPG	2018-07-19 15:59:54	58.53787778	-135.92438611	219	Abundance	0	0	0	0	Good	LFT	2018-09-27	SO-2017.1	0
SO_C_20180719_A_1901.JPG	2018-07-19 15:59:55	58.53788333	-135.92353333	219	Abundance	0	0	0	0	Good	LFT	2018-09-27	SO-2017.1	0
SO_C_20180719_A_1902.JPG	2018-07-19 15:59:56	58.53788889	-135.92268333	219	Abundance	0	0	0	0	Good	LFT	2018-09-27	SO-2017.1	0
SO_C_20180719_A_1903.JPG	2018-07-19 15:59:57	58.53789167	-135.92183056	219	Abundance	0	0	0	0	Good	LFT	2018-09-27	SO-2017.1	0
SO_C_20180719_A_1904.JPG	2018-07-19 15:59:58	58.53789444	-135.92098056	219	Abundance	0	0	1	0	Good	LFT	2018-09-27	SO-2017.1	0
SO_C_20180719_A_1905.JPG	2018-07-19 15:59:59	58.53789444	-135.92012500	219	Abundance	0	0	1	0	Good	LFT	2018-09-27	SO-2017.1	0
SO_C_20180719_A_1906.JPG	2018-07-19 16:00:00	58.53789444	-135.91927222	219	Abundance	0	0	0	0	Good	LFT	2018-09-27	SO-2017.1	0
SO_C_20180719_A_1907.JPG	2018-07-19 16:00:01	58.53789167	-135.91841389	219	Abundance	0	0	0	0	Good	LFT	2018-09-27	SO-2017.1	0
SO_C_20180719_A_1908.JPG	2018-07-19 16:00:02	58.53789444	-135.91755556	219	Abundance	0	0	0	0	Good	LFT	2018-09-27	SO-2017.1	0
SO_C_20180719_A_1909.JPG	2018-07-19 16:00:03	58.53790000	-135.91669444	219	Abundance	0	0	0	0	Good	LFT	2018-09-27	SO-2017.1	0
SO_C_20180719_A_1910.JPG	2018-07-19 16:00:04	58.53790556	-135.91583611	219	Abundance	0	0	0	0	Good	LFT	2018-09-27	SO-2017.1	0
SO_C_20180719_A_1911.JPG	2018-07-19 16:00:05	58.53791667	-135.91497500	219	Abundance	0	0	0	0	Good	LFT	2018-09-27	SO-2017.1	0
SO_C_20180719_A_1912.JPG	2018-07-19 16:00:06	58.53792500	-135.91411389	219	Abundance	0	0	0	0	Good	LFT	2018-09-27	SO-2017.1	0
SO_C_20180719_A_1913.JPG	2018-07-19 16:00:07	58.53793333	-135.91325278	219	Abundance	0	0	0	0	Good	LFT	2018-09-27	SO-2017.1	0
SO_C_20180719_A_1914.JPG	2018-07-19 16:00:08	58.53794444	-135.91238889	219	Abundance	0	0	1	0	Good	LFT	2018-09-27	SO-2017.1	0
SO_C_20180719_A_1915.JPG	2018-07-19 16:00:09	58.53795556	-135.91151944	219	Abundance	0	0	0	0	Good	LFT	2018-09-27	SO-2017.1	0
SO_C_20180719_A_1916.JPG	2018-07-19 16:00:10	58.53796389	-135.91065278	219	Abundance	0	0	0	1	Good	LFT	2018-09-27	SO-2017.1	0
SO_C_20180719_A_1917.JPG	2018-07-19 16:00:11	58.53797222	-135.90978056	219	Abundance	0	0	0	1	Good	LFT	2018-09-27	SO-2017.1	0
SO_C_20180719_A_1918.JPG	2018-07-19 16:00:12	58.53797778	-135.90890833	219	Abundance	0	0	1	1	Good	LFT	2018-09-27	SO-2017.1	0
SO_C_20180719_A_1919.JPG	2018-07-19 16:00:13	58.53798056	-135.90803611	219	Abundance	0	0	1	1	Good	LFT	2018-09-27	SO-2017.1	0
SO_C_20180719_A_1920.JPG	2018-07-19 16:00:14	58.53798611	-135.90716389	218	Abundance	0	0	1	1	Good	LFT	2018-09-27	SO-2017.1	0
SO_C_20180719_A_1921.JPG	2018-07-19 16:00:15	58.53798889	-135.90629167	218	Abundance	0	0	1	1	Good	LFT	2018-09-27	SO-2017.1	0
SO_C_20180719_A_1922.JPG	2018-07-19 16:00:16	58.53799444	-135.90541944	218	Abundance	0	0	0	1	Good	LFT	2018-09-27	SO-2017.1	0
SO_C_20180719_A_1923.JPG	2018-07-19 16:00:17	58.53800278	-135.90455278	217	Abundance	0	0	1	1	Good	LFT	2018-09-27	SO-2017.1	0
SO_C_20180719_A_1924.JPG	2018-07-19 16:00:18	58.53800833	-135.90368611	217	Abundance	0	0	1	1	Good	LFT	2018-09-27	SO-2017.1	0
SO_C_20180719_A_1925.JPG	2018-07-19 16:00:19	58.53801667	-135.90282222	217	Abundance	0	0	1	1	Good	LFT	2018-09-27	SO-2017.1	0
SO_C_20180719_A_1926.JPG	2018-07-19 16:00:20	58.53802500	-135.90196111	217	Abundance	0	0	1	1	Good	LFT	2018-09-27	SO-2017.1	0
SO_C_20180719_A_1927.JPG	2018-07-19 16:00:21	58.53803611	-135.90110278	217	Abundance	0	0	1	0	Good	LFT	2018-09-27	SO-2017.1	0
SO_C_20180719_A_1928.JPG	2018-07-19 16:00:22	58.53804722	-135.90024444	217	Abundance	0	0	0	0	Good	LFT	2018-09-27	SO-2017.1	0
SO_C_20180719_A_1929.JPG	2018-07-19 16:00:23	58.53805833	-135.89938889	217	Abundance	0	0	0	0	Good	LFT	2018-09-27	SO-2017.1	0
SO_C_20180719_A_1930.JPG	2018-07-19 16:00:24	58.53807222	-135.89853056	217	Abundance	0	0	1	0	Good	LFT	2018-09-27	SO-2017.1	0
SO_C_20180719_A_1931.JPG	2018-07-19 16:00:25	58.53808611	-135.89767222	217	Abundance	0	0	0	0	Good	LFT	2018-09-27	SO-2017.1	0
SO_C_20180719_A_1932.JPG	2018-07-19 16:00:26	58.53809444	-135.89681389	217	Abundance	0	0	0	1	Good	LFT	2018-09-27	SO-2017.1	0
SO_C_20180719_A_1933.JPG	2018-07-19 16:00:27	58.53808611	-135.89597222	218	Abundance	0	0	0	1	Good	LFT	2018-09-27	SO-2017.1	0
SO_C_20180719_A_1934.JPG	2018-07-19 16:00:28	58.53810000	-135.89512222	218	Abundance	0	0	0	1	Good	LFT	2018-09-27	SO-2017.1	0
SO_C_20180719_A_1935.JPG	2018-07-19 16:00:29	58.53813056	-135.89426111	218	Abundance	0	0	0	1	Good	LFT	2018-09-27	SO-2017.1	0
SO_C_20180719_A_1936.JPG	2018-07-19 16:00:30	58.53813889	-135.89339722	218	Abundance	0	0	0	1	Good	LFT	2018-09-27	SO-2017.1	0
SO_C_20180719_A_1937.JPG	2018-07-19 16:00:31	58.53814444	-135.89253889	218	Abundance	0	0	0	1	Good	LFT	2018-09-27	SO-2017.1	0
SO_C_20180719_A_1938.JPG	2018-07-19 16:00:41	58.53811667	-135.88399722	218	Abundance	0	0	0	1	Good	LFT	2018-09-27	SO-2017.1	0
SO_C_20180719_A_1939.JPG	2018-07-19 16:00:42	58.53811111	-135.88315000	218	Abundance	0	0	0	1	Good	LFT	2018-09-27	SO-2017.1	0
SO_C_20180719_A_1940.JPG	2018-07-19 16:00:43	58.53810556	-135.88230556	218	Abundance	0	0	0	1	Good	LFT	2018-09-27	SO-2017.1	0
SO_C_20180719_A_1941.JPG	2018-07-19 16:00:44	58.53810278	-135.88145833	218	Abundance	0	0	0	1	Good	LFT	2018-09-27	SO-2017.1	0
SO_C_20180719_A_1942.JPG	2018-07-19 16:00:45	58.53810000	-135.88061667	218	Abundance	0	0	0	1	Good	LFT	2018-09-27	SO-2017.1	0
SO_C_20180719_A_1943.JPG	2018-07-19 16:00:46	58.53809444	-135.87977500	218	Abundance	0	0	0	1	Good	LFT	2018-09-27	SO-2017.1	0
SO_C_20180719_A_1944.JPG	2018-07-19 16:00:47	58.53809444	-135.87893056	219	Abundance	0	0	0	1	Good	LFT	2018-09-27	SO-2017.1	0
SO_C_20180719_A_1945.JPG	2018-07-19 16:00:48	58.53809722	-135.87808889	219	Abundance	0	0	0	1	Good	LFT	2018-09-27	SO-2017.1	0
SO_C_20180719_A_1946.JPG	2018-07-19 16:00:49	58.53810000	-135.87724722	219	Abundance	0	0	1	0	Good	LFT	2018-09-27	SO-2017.1	0
SO_C_20180719_A_1947.JPG	2018-07-19 16:00:50	58.53810833	-135.87640556	220	Abundance	0	0	1	0	Good	LFT	2018-09-27	SO-2017.1	0
SO_C_20180719_A_1948.JPG	2018-07-19 16:00:51	58.53813056	-135.87556389	220	Abundance	0	0	1	0	Good	LFT	2018-09-27	SO-2017.1	0
SO_C_20180719_A_1949.JPG	2018-07-19 16:00:52	58.53815556	-135.87471944	220	Abundance	0	0	0	0	Good	LFT	2018-09-27	SO-2017.1	0
SO_C_20180719_A_1950.JPG	2018-07-19 16:00:53	58.53818333	-135.87387778	221	Abundance	0	0	1	0	Good	LFT	2018-09-27	SO-2017.1	0
SO_C_20180719_A_1951.JPG	2018-07-19 16:00:54	58.53821111	-135.87303056	221	Abundance	0	0	1	0	Good	LFT	2018-09-27	SO-2017.1	0
SO_C_20180719_A_1952.JPG	2018-07-19 16:00:55	58.53824444	-135.87218889	222	Abundance	0	0	1	0	Good	LFT	2018-09-27	SO-2017.1	0
SO_C_20180719_A_1953.JPG	2018-07-19 16:00:56	58.53827778	-135.87135000	223	Abundance	0	0	1	0	Good	LFT	2018-09-27	SO-2017.1	0
SO_C_20180719_A_1954.JPG	2018-07-19 16:03:02	58.54162222	-135.86996944	214	Abundance	0	0	1	0	Good	LFT	2018-09-27	SO-2017.1	0
SO_C_20180719_A_1955.JPG	2018-07-19 16:03:03	58.54162222	-135.87082500	213	Abundance	0	0	1	0	Good	LFT	2018-09-27	SO-2017.1	0
SO_C_20180719_A_1956.JPG	2018-07-19 16:03:04	58.54163611	-135.87168333	211	Abundance	0	0	1	0	Good	LFT	2018-09-27	SO-2017.1	0
SO_C_20180719_A_1957.JPG	2018-07-19 16:03:05	58.54166111	-135.87254167	210	Abundance	0	0	1	0	Good	LFT	2018-09-27	SO-2017.1	0
SO_C_20180719_A_1958.JPG	2018-07-19 16:03:06	58.54168611	-135.87339722	209	Abundance	0	0	1	0	Good	LFT	2018-09-27	SO-2017.1	0
SO_C_20180719_A_1959.JPG	2018-07-19 16:03:07	58.54170833	-135.87425278	209	Abundance	0	0	1	0	Good	LFT	2018-09-27	SO-2017.1	0
SO_C_20180719_A_1960.JPG	2018-07-19 16:03:08	58.54173056	-135.87510000	208	Abundance	0	0	1	0	Good	LFT	2018-09-27	SO-2017.1	0
SO_C_20180719_A_1961.JPG	2018-07-19 16:03:09	58.54174722	-135.87593333	208	Abundance	0	0	1	0	Good	LFT	2018-09-27	SO-2017.1	0
SO_C_20180719_A_1962.JPG	2018-07-19 16:03:10	58.54176389	-135.87676111	208	Abundance	0	0	1	0	Good	LFT	2018-09-27	SO-2017.1	0
SO_C_20180719_A_1963.JPG	2018-07-19 16:03:11	58.54178333	-135.87758056	209	Abundance	0	0	0	0	Good	LFT	2018-09-27	SO-2017.1	0
SO_C_20180719_A_1964.JPG	2018-07-19 16:03:12	58.54180278	-135.87839444	210	Abundance	0	0	0	0	Good	LFT	2018-09-27	SO-2017.1	0
SO_C_20180719_A_1965.JPG	2018-07-19 16:03:13	58.54181944	-135.87920278	211	Abundance	0	0	0	0	Good	LFT	2018-09-27	SO-2017.1	0
SO_C_20180719_A_1966.JPG	2018-07-19 16:03:14	58.54183056	-135.88001111	213	Abundance	0	0	1	0	Good	LFT	2018-09-27	SO-2017.1	0
SO_C_20180719_A_1967.JPG	2018-07-19 16:03:15	58.54184167	-135.88081667	216	Abundance	0	0	1	1	Good	LFT	2018-09-27	SO-2017.1	0
SO_C_20180719_A_1968.JPG	2018-07-19 16:03:16	58.54185000	-135.88162778	218	Abundance	0	0	1	1	Good	LFT	2018-09-27	SO-2017.1	0
SO_C_20180719_A_1969.JPG	2018-07-19 16:03:17	58.54185556	-135.88244444	220	Abundance	0	0	0	1	Good	LFT	2018-09-27	SO-2017.1	0
SO_C_20180719_A_1970.JPG	2018-07-19 16:03:18	58.54186111	-135.88326667	223	Abundance	0	0	0	1	Good	LFT	2018-09-27	SO-2017.1	0
SO_C_20180719_A_1971.JPG	2018-07-19 16:03:19	58.54186667	-135.88410278	224	Abundance	0	0	0	1	Good	LFT	2018-09-27	SO-2017.1	0
SO_C_20180719_A_1972.JPG	2018-07-19 16:03:20	58.54187222	-135.88493333	225	Abundance	0	0	0	1	Good	LFT	2018-09-27	SO-2017.1	0
SO_C_20180719_A_1973.JPG	2018-07-19 16:03:21	58.54187500	-135.88576944	226	Abundance	0	0	0	1	Good	LFT	2018-09-27	SO-2017.1	0
SO_C_20180719_A_1974.JPG	2018-07-19 16:03:22	58.54188056	-135.88660556	226	Abundance	0	0	0	1	Good	LFT	2018-09-27	SO-2017.1	0
SO_C_20180719_A_1975.JPG	2018-07-19 16:03:23	58.54188333	-135.88744444	226	Abundance	0	0	0	1	Good	LFT	2018-09-27	SO-2017.1	0
SO_C_20180719_A_1976.JPG	2018-07-19 16:03:24	58.54188611	-135.88828333	226	Abundance	0	0	1	1	Good	LFT	2018-09-27	SO-2017.1	0
SO_C_20180719_A_1977.JPG	2018-07-19 16:03:25	58.54188611	-135.88912222	225	Abundance	0	0	1	1	Good	LFT	2018-09-27	SO-2017.1	0
SO_C_20180719_A_1978.JPG	2018-07-19 16:03:26	58.54187500	-135.88996111	224	Abundance	0	0	1	1	Good	LFT	2018-09-27	SO-2017.1	0
SO_C_20180719_A_1979.JPG	2018-07-19 16:03:27	58.54186111	-135.89080000	223	Abundance	0	0	1	0	Good	LFT	2018-09-27	SO-2017.1	0
SO_C_20180719_A_1980.JPG	2018-07-19 16:03:28	58.54184444	-135.89163333	222	Abundance	0	0	1	0	Good	LFT	2018-09-27	SO-2017.1	0
SO_C_20180719_A_1981.JPG	2018-07-19 16:03:29	58.54182778	-135.89246667	222	Abundance	0	0	1	0	Good	LFT	2018-09-27	SO-2017.1	0
SO_C_20180719_A_1982.JPG	2018-07-19 16:03:30	58.54180833	-135.89329444	221	Abundance	0	0	1	0	Good	LFT	2018-09-27	SO-2017.1	0
SO_C_20180719_A_1983.JPG	2018-07-19 16:03:31	58.54179444	-135.89411944	221	Abundance	0	0	0	0	Good	LFT	2018-09-27	SO-2017.1	0
SO_C_20180719_A_1984.JPG	2018-07-19 16:03:32	58.54177778	-135.89493889	221	Abundance	0	0	0	0	Good	LFT	2018-09-27	SO-2017.1	0
SO_C_20180719_A_1985.JPG	2018-07-19 16:03:33	58.54176389	-135.89575833	222	Abundance	0	0	1	0	Good	LFT	2018-09-27	SO-2017.1	0
SO_C_20180719_A_1986.JPG	2018-07-19 16:03:34	58.54175278	-135.89657222	222	Abundance	0	0	1	0	Good	LFT	2018-09-27	SO-2017.1	0
SO_C_20180719_A_1987.JPG	2018-07-19 16:03:35	58.54173889	-135.89738889	223	Abundance	0	0	1	0	Good	LFT	2018-09-27	SO-2017.1	0
SO_C_20180719_A_1988.JPG	2018-07-19 16:03:36	58.54172500	-135.89820278	224	Abundance	0	0	1	0	Good	LFT	2018-09-27	SO-2017.1	0
SO_C_20180719_A_1989.JPG	2018-07-19 16:03:37	58.54171111	-135.89902222	224	Abundance	0	0	1	0	Good	LFT	2018-09-27	SO-2017.1	0
SO_C_20180719_A_1990.JPG	2018-07-19 16:03:38	58.54169722	-135.89983889	225	Abundance	0	0	1	1	Good	LFT	2018-09-27	SO-2017.1	0
SO_C_20180719_A_1991.JPG	2018-07-19 16:03:39	58.54168333	-135.90065833	225	Abundance	0	0	0	1	Good	LFT	2018-09-27	SO-2017.1	0
SO_C_20180719_A_1992.JPG	2018-07-19 16:03:40	58.54166944	-135.90148056	225	Abundance	0	0	1	1	Good	LFT	2018-09-27	SO-2017.1	0
SO_C_20180719_A_1993.JPG	2018-07-19 16:03:41	58.54165556	-135.90230556	226	Abundance	0	0	1	0	Good	LFT	2018-09-27	SO-2017.1	0
SO_C_20180719_A_1994.JPG	2018-07-19 16:03:42	58.54164167	-135.90313333	225	Abundance	0	0	1	0	Good	LFT	2018-09-27	SO-2017.1	0
SO_C_20180719_A_1995.JPG	2018-07-19 16:03:43	58.54163056	-135.90396389	225	Abundance	0	0	1	0	Good	LFT	2018-09-27	SO-2017.1	0
SO_C_20180719_A_1996.JPG	2018-07-19 16:03:44	58.54162222	-135.90480000	225	Abundance	0	0	1	0	Good	LFT	2018-09-27	SO-2017.1	0
SO_C_20180719_A_1997.JPG	2018-07-19 16:03:45	58.54161667	-135.90563333	225	Abundance	0	0	1	1	Good	LFT	2018-09-27	SO-2017.1	0
SO_C_20180719_A_1998.JPG	2018-07-19 16:03:46	58.54160833	-135.90647222	224	Abundance	0	0	1	1	Good	LFT	2018-09-27	SO-2017.1	0
SO_C_20180719_A_1999.JPG	2018-07-19 16:03:47	58.54160278	-135.90731111	223	Abundance	0	0	0	1	Good	LFT	2018-09-27	SO-2017.1	0
SO_C_20180719_A_2000.JPG	2018-07-19 16:03:48	58.54159444	-135.90814722	223	Abundance	0	0	1	1	Good	LFT	2018-09-27	SO-2017.1	0
SO_C_20180719_A_2001.JPG	2018-07-19 16:03:49	58.54158611	-135.90898611	222	Abundance	0	0	0	1	Good	LFT	2018-09-27	SO-2017.1	0
SO_C_20180719_A_2002.JPG	2018-07-19 16:03:50	58.54158056	-135.90982500	221	Abundance	0	0	0	1	Good	LFT	2018-09-27	SO-2017.1	0
SO_C_20180719_A_2003.JPG	2018-07-19 16:03:51	58.54157500	-135.91066111	221	Abundance	0	0	0	1	Good	LFT	2018-09-27	SO-2017.1	0
SO_C_20180719_A_2004.JPG	2018-07-19 16:03:52	58.54157222	-135.91149722	221	Abundance	0	0	0	1	Good	LFT	2018-09-27	SO-2017.1	0
SO_C_20180719_A_2005.JPG	2018-07-19 16:03:53	58.54156389	-135.91233056	221	Abundance	0	0	0	1	Good	LFT	2018-09-27	SO-2017.1	0
SO_C_20180719_A_2006.JPG	2018-07-19 16:03:54	58.54155833	-135.91316111	220	Abundance	0	0	0	1	Good	LFT	2018-09-27	SO-2017.1	0
SO_C_20180719_A_2007.JPG	2018-07-19 16:03:55	58.54155278	-135.91399167	220	Abundance	0	0	0	1	Good	LFT	2018-09-27	SO-2017.1	0
SO_C_20180719_A_2008.JPG	2018-07-19 16:03:56	58.54155000	-135.91481944	221	Abundance	0	0	0	1	Good	LFT	2018-09-27	SO-2017.1	0
SO_C_20180719_A_2009.JPG	2018-07-19 16:03:57	58.54154722	-135.91564722	221	Abundance	0	0	0	1	Good	LFT	2018-09-27	SO-2017.1	0
SO_C_20180719_A_2010.JPG	2018-07-19 16:03:58	58.54155000	-135.91648056	221	Abundance	0	0	1	1	Good	LFT	2018-09-27	SO-2017.1	0
SO_C_20180719_A_2011.JPG	2018-07-19 16:03:59	58.54155278	-135.91731111	222	Abundance	0	0	1	1	Good	LFT	2018-09-27	SO-2017.1	0
SO_C_20180719_A_2012.JPG	2018-07-19 16:04:00	58.54155278	-135.91814722	222	Abundance	0	0	1	0	Good	LFT	2018-09-27	SO-2017.1	0
SO_C_20180719_A_2013.JPG	2018-07-19 16:04:01	58.54155556	-135.91898056	222	Abundance	0	0	1	1	Good	LFT	2018-09-27	SO-2017.1	0
SO_C_20180719_A_2014.JPG	2018-07-19 16:04:02	58.54155833	-135.91982222	223	Abundance	0	0	0	1	Good	LFT	2018-09-27	SO-2017.1	0
SO_C_20180719_A_2015.JPG	2018-07-19 16:04:03	58.54155556	-135.92066111	223	Abundance	0	0	0	1	Good	LFT	2018-09-27	SO-2017.1	0
SO_C_20180719_A_2016.JPG	2018-07-19 16:04:04	58.54155278	-135.92150556	223	Abundance	0	0	0	1	Good	LFT	2018-09-27	SO-2017.1	0
SO_C_20180719_A_2017.JPG	2018-07-19 16:04:05	58.54154722	-135.92234722	224	Abundance	0	0	0	1	Good	LFT	2018-09-27	SO-2017.1	0
SO_C_20180719_A_2018.JPG	2018-07-19 16:04:06	58.54154167	-135.92319167	224	Abundance	0	0	1	1	Good	LFT	2018-09-27	SO-2017.1	0
SO_C_20180719_A_2019.JPG	2018-07-19 16:04:07	58.54153333	-135.92403889	224	Abundance	0	0	1	1	Good	LFT	2018-09-27	SO-2017.1	0
[truncated: 2,836 more rows]
